# Supplementary material for: Comparative proteomics analysis reveals the difference during antler regeneration stage between red deer and sika deer
Source: PeerJ. 2019 Jul 17;7:e7299. doi: 10.7717/peerj.7299 (PMC6642628; doi:10.7717/peerj.7299)
Supplement: Table S1 [file peerj-07-7299-s001.xlsx]

## Sheet: proteinGroups
Table S1. The proteins identified in both sika deer (SD1) and red deer (RD) antler.
Protein	ProteinGroup	FastaHeaders	Proteins	Peptides	UniquePeptides	RazorUniquePeptides	Coverage	MolWeight	LFQ intensity SD1-1	LFQ intensity SD1-2	LFQ intensity SD1-3	LFQ intensity RD2-1	LFQ intensity RD2-2	LFQ intensity RD2-3
A0A172ZQ52	A0A172ZQ52;A0A0U1Z9A3;Q9MQJ9;Q85J31;Q53U58;Q4R1D5;Q2V095;Q001D8;J9JD41;G8DNT7;D3KCM3;D3KCL0;D3KCJ7;A0A172ITF8;A0A0M3R6T9	tr|A0A172ZQ52|A0A172ZQ52_CEREL ATP synthase protein 8 OS=Cervus elaphus alxaicus OX=1851208 GN=ATP8 PE=3 SV=1;tr|A0A0U1Z9A3|A0A0U1Z9A3_CEREL ATP synthase protein 8 OS=Cervus elaphus OX=9860 GN=ATP8 PE=3 SV=1;sp|Q9MQJ9|ATP8_CEREH ATP synthase protein 8 OS=C	15	2	2	2	33.3	7.9404	37991000	17115000	15414000	48864000	56619000	51945000
A7LLN2	A7LLN2;A7LLM6;A0A142BZ69;A0A212DJ72	tr|A7LLN2|A7LLN2_9CETA Porphobilinogen deaminase (Fragment) OS=Cervus canadensis canadensis OX=9861 GN=PBGD PE=4 SV=2;tr|A7LLM6|A7LLM6_CEREL Porphobilinogen deaminase (Fragment) OS=Cervus elaphus OX=9860 GN=PBGD PE=4 SV=2;tr|A0A142BZ69|A0A142BZ69_CEREL Por	4	2	2	2	20	21.305		12202000	16692000	15993000	16445000	18343000
Q15GJ0	Q15GJ0;Q15GG6;Q85J33;Q53U59;Q2V096;J7EV25;G8DNT6;E3VRF0;E3VRD7;D3KCM2;D3KCK9;A1YKC7;A0A172ITF9;Q4R1D6;D3KCJ6;A0A172ZQ51;A0A0U1Z6F8;Q001D9	tr|Q15GJ0|Q15GJ0_CEREL Cytochrome c oxidase subunit 2 (Fragment) OS=Cervus elaphus OX=9860 PE=3 SV=1;tr|Q15GG6|Q15GG6_CERNI Cytochrome c oxidase subunit 2 (Fragment) OS=Cervus nippon OX=9863 GN=COII PE=3 SV=1;tr|Q85J33|Q85J33_CERNY Cytochrome c oxidase sub	18	6	6	6	35.9	22.349	117130000	136930000	214440000	79551000	76074000	79626000
A0A212BZC3	A0A212BZC3	tr|A0A212BZC3|A0A212BZC3_CEREH CA5B OS=Cervus elaphus hippelaphus OX=46360 GN=Celaphus_00010125 PE=4 SV=1	1	1	1	1	3.7	27.996
A0A212BZD0	A0A212BZD0	tr|A0A212BZD0|A0A212BZD0_CEREH PLS3 (Fragment) OS=Cervus elaphus hippelaphus OX=46360 GN=Celaphus_00009806 PE=4 SV=1	1	5	5	5	25.7	23.892	257890000	125970000	123140000	158540000	199860000	165310000
A0A212BZH7	A0A212BZH7	tr|A0A212BZH7|A0A212BZH7_CEREH UBA1 OS=Cervus elaphus hippelaphus OX=46360 GN=Celaphus_00009899 PE=3 SV=1	1	8	8	8	13	116.56	73932000	39067000	51588000	30095000	72975000	32031000
A0A212BZP0	A0A212BZP0	tr|A0A212BZP0|A0A212BZP0_CEREH Biglycan OS=Cervus elaphus hippelaphus OX=46360 GN=Celaphus_00009647 PE=3 SV=1	1	14	14	14	44.9	45.07	2073700000	2000900000	2211900000	4671300000	4249600000	4867900000
A0A212BZP9	A0A212BZP9	tr|A0A212BZP9|A0A212BZP9_CEREH Uncharacterized protein OS=Cervus elaphus hippelaphus OX=46360 GN=Celaphus_00009657 PE=4 SV=1	1	5	5	5	36.4	18.885	128990000	343220000	275670000	358640000	238530000	219250000
A0A212BZU8	A0A212BZU8	tr|A0A212BZU8|A0A212BZU8_CEREH PLS3 (Fragment) OS=Cervus elaphus hippelaphus OX=46360 GN=Celaphus_00009807 PE=4 SV=1	1	8	6	6	37.6	28.318	109090000	107320000	108410000	150630000	97313000	136270000
A0A212BZX3	A0A212BZX3	tr|A0A212BZX3|A0A212BZX3_CEREH Rab GDP dissociation inhibitor OS=Cervus elaphus hippelaphus OX=46360 GN=Celaphus_00009676 PE=3 SV=1	1	10	7	7	29.3	50.566	182490000	93986000	118590000	134880000	142400000	131750000
A0A212C005	A0A212C005	tr|A0A212C005|A0A212C005_CEREH FHL1 (Fragment) OS=Cervus elaphus hippelaphus OX=46360 GN=Celaphus_00009554 PE=4 SV=1	1	7	7	7	40.4	22.104			27252000	35625000	53568000	48214000
A0A212C007	A0A212C007	tr|A0A212C007|A0A212C007_CEREH HSD17B10 OS=Cervus elaphus hippelaphus OX=46360 GN=Celaphus_00009962 PE=3 SV=1	1	4	4	4	27.2	27.137	115790000	76092000	56316000	72828000	78447000	68057000
A0A212C015	A0A212C015	tr|A0A212C015|A0A212C015_CEREH NONO OS=Cervus elaphus hippelaphus OX=46360 GN=Celaphus_00009862 PE=4 SV=1	1	4	4	4	13.2	54.121		24368000	18228000
A0A212C020	A0A212C020	tr|A0A212C020|A0A212C020_CEREH Uncharacterized protein (Fragment) OS=Cervus elaphus hippelaphus OX=46360 GN=Celaphus_00009698 PE=4 SV=1	1	3	1	1	17.5	24.465	34025000	20871000	29240000	20822000	19054000	19173000
A0A212C032	A0A212C032	tr|A0A212C032|A0A212C032_CEREH BCAP31 OS=Cervus elaphus hippelaphus OX=46360 GN=Celaphus_00009652 PE=4 SV=1	1	3	3	3	22.8	14.241	22082000		14725000
A0A212C051	A0A212C051	tr|A0A212C051|A0A212C051_CEREH LAMP2 (Fragment) OS=Cervus elaphus hippelaphus OX=46360 GN=Celaphus_00009486 PE=3 SV=1	1	2	2	2	8.3	22.651		145850000	180760000	175880000	136140000	151370000
A0A212C0B9	A0A212C0B9	tr|A0A212C0B9|A0A212C0B9_CEREH TRAPPC2 OS=Cervus elaphus hippelaphus OX=46360 GN=Celaphus_00010138 PE=4 SV=1	1	1	1	1	3.3	26.413	299750000	118090000	58804000	77101000	150510000	78048000
A0A212C0D2	A0A212C0D2;A0A212C356	tr|A0A212C0D2|A0A212C0D2_CEREH Uncharacterized protein (Fragment) OS=Cervus elaphus hippelaphus OX=46360 GN=Celaphus_00009848 PE=3 SV=1	2	11	11	11	40.9	33.147	162670000	111620000	177410000	101630000	63945000	135210000
A0A212C0F3	A0A212C0F3	tr|A0A212C0F3|A0A212C0F3_CEREH Hypoxanthine phosphoribosyltransferase (Fragment) OS=Cervus elaphus hippelaphus OX=46360 GN=Celaphus_00009540 PE=3 SV=1	1	5	5	5	26.6	24.3		37443000	35238000	25793000
A0A212C0K1	A0A212C0K1	tr|A0A212C0K1|A0A212C0K1_CEREH SLC25A5 OS=Cervus elaphus hippelaphus OX=46360 GN=Celaphus_00009470 PE=3 SV=1	1	6	2	2	24.7	32.528	58804000	43395000	31252000
A0A212C0M2	A0A212C0M2	tr|A0A212C0M2|A0A212C0M2_CEREH RBM3 (Fragment) OS=Cervus elaphus hippelaphus OX=46360 GN=Celaphus_00009920 PE=4 SV=1	1	3	3	3	27.3	19.946		85091000	53224000
A0A212C0M5	A0A212C0M5	tr|A0A212C0M5|A0A212C0M5_CEREH Uncharacterized protein OS=Cervus elaphus hippelaphus OX=46360 GN=Celaphus_00010009 PE=3 SV=1	1	2	1	1	4.4	40.101			47966000
A0A212C0Q8	A0A212C0Q8	tr|A0A212C0Q8|A0A212C0Q8_CEREH Phosphoglycerate kinase OS=Cervus elaphus hippelaphus OX=46360 GN=Celaphus_00009819 PE=3 SV=1	1	7	7	7	55.1	17.119	160430000	140620000	241860000	231060000	275510000	204520000
A0A212C0T0	A0A212C0T0	tr|A0A212C0T0|A0A212C0T0_CEREH NDUFB11 OS=Cervus elaphus hippelaphus OX=46360 GN=Celaphus_00009897 PE=4 SV=1	1	1	1	1	7.1	17.446		19244000
A0A212C0W0	A0A212C0W0;A0A212C111;A0A089ZXF2	tr|A0A212C0W0|A0A212C0W0_CEREH Uncharacterized protein OS=Cervus elaphus hippelaphus OX=46360 GN=Celaphus_00010160 PE=3 SV=1;tr|A0A212C111|A0A212C111_CEREH DDX3X OS=Cervus elaphus hippelaphus OX=46360 GN=Celaphus_00010008 PE=3 SV=1;tr|A0A089ZXF2|A0A089ZXF2	3	3	3	3	9.8	40.671		29959000	16380000	17472000	13803000	14131000
A0A212C0X5	A0A212C0X5	tr|A0A212C0X5|A0A212C0X5_CEREH RPL10 (Fragment) OS=Cervus elaphus hippelaphus OX=46360 GN=Celaphus_00009672 PE=4 SV=1	1	1	1	1	8.8	11.781	15721000
A0A212C0Z9	A0A212C0Z9	tr|A0A212C0Z9|A0A212C0Z9_CEREH Uncharacterized protein OS=Cervus elaphus hippelaphus OX=46360 GN=Celaphus_00009671 PE=4 SV=1	1	2	2	2	8.4	29.462	16787000
A0A212C160	A0A212C160	tr|A0A212C160|A0A212C160_CEREH MSN (Fragment) OS=Cervus elaphus hippelaphus OX=46360 GN=Celaphus_00009982 PE=4 SV=1	1	20	20	20	41.9	71.661	729770000	434320000	527670000	625610000	531380000	628160000
A0A212C161	A0A212C161	tr|A0A212C161|A0A212C161_CEREH PRDX4 OS=Cervus elaphus hippelaphus OX=46360 GN=Celaphus_00010070 PE=4 SV=1	1	5	5	5	20.7	34.363	415820000	435090000	246170000	239940000	188630000	278070000
A0A212C171	A0A212C171	tr|A0A212C171|A0A212C171_CEREH Peptidylprolyl isomerase OS=Cervus elaphus hippelaphus OX=46360 GN=Celaphus_00015722 PE=4 SV=1	1	5	5	5	19.4	26.663	65249000	85625000	100030000	156490000	145560000	203460000
A0A212C189	A0A212C189	tr|A0A212C189|A0A212C189_CEREH ITGAV (Fragment) OS=Cervus elaphus hippelaphus OX=46360 GN=Celaphus_00015684 PE=3 SV=1	1	2	2	2	4.7	68.154	20001000
A0A212C1D7	A0A212C1D7	tr|A0A212C1D7|A0A212C1D7_CEREH ACTR3 (Fragment) OS=Cervus elaphus hippelaphus OX=46360 GN=Celaphus_00015932 PE=3 SV=1	1	2	1	2	16.7	27.878		23771000	26224000	41012000	30680000	36742000
A0A212C1G6	A0A212C1G6	tr|A0A212C1G6|A0A212C1G6_CEREH Uncharacterized protein OS=Cervus elaphus hippelaphus OX=46360 GN=Celaphus_00015632 PE=4 SV=1	1	2	2	2	16.8	12.658		29118000	30907000			29523000
A0A212C1N8	A0A212C1N8	tr|A0A212C1N8|A0A212C1N8_CEREH SSB OS=Cervus elaphus hippelaphus OX=46360 GN=Celaphus_00015790 PE=4 SV=1	1	4	4	4	14.1	50.04		25558000	22323000	23281000	27446000	30278000
A0A212C1P4	A0A212C1P4	tr|A0A212C1P4|A0A212C1P4_CEREH HSPD1 OS=Cervus elaphus hippelaphus OX=46360 GN=Celaphus_00016005 PE=3 SV=1	1	18	18	18	37.9	60.975	524870000	483840000	474840000	329240000	417960000	324610000
A0A212C1U6	A0A212C1U6	tr|A0A212C1U6|A0A212C1U6_CEREH ACTR3 OS=Cervus elaphus hippelaphus OX=46360 GN=Celaphus_00015933 PE=4 SV=1	1	1	1	1	13.3	10.382		14712000	22389000
A0A212C220	A0A212C220	tr|A0A212C220|A0A212C220_CEREH Uncharacterized protein OS=Cervus elaphus hippelaphus OX=46360 GN=Celaphus_00015633 PE=4 SV=1	1	2	2	2	27	8.1378	55380000	43537000	23664000	34831000	85914000	50018000
A0A212C2A8	A0A212C2A8	tr|A0A212C2A8|A0A212C2A8_CEREH RALB OS=Cervus elaphus hippelaphus OX=46360 GN=Celaphus_00015960 PE=4 SV=1	1	1	1	1	6.8	23.438			10792000
A0A212C2C9	A0A212C2C9	tr|A0A212C2C9|A0A212C2C9_CEREH Probable tRNA N6-adenosine threonylcarbamoyltransferase, mitochondrial OS=Cervus elaphus hippelaphus OX=46360 GN=OSGEPL1 PE=3 SV=1	1	1	1	1	3.4	45.128
A0A212C2D4	A0A212C2D4	tr|A0A212C2D4|A0A212C2D4_CEREH HNRNPA3 (Fragment) OS=Cervus elaphus hippelaphus OX=46360 GN=Celaphus_00015732 PE=4 SV=1	1	1	1	1	7.7	23.049			32537000			14160000
A0A212C2D7	A0A212C2D7	tr|A0A212C2D7|A0A212C2D7_CEREH Uncharacterized protein OS=Cervus elaphus hippelaphus OX=46360 GN=Celaphus_00015701 PE=4 SV=1	1	2	2	2	7.5	27.336		29080000	25317000
A0A212C2H4	A0A212C2H4	tr|A0A212C2H4|A0A212C2H4_CEREH DBI OS=Cervus elaphus hippelaphus OX=46360 GN=Celaphus_00015946 PE=4 SV=1	1	2	2	2	41.3	7.3023	34088000	48393000			70257000
A0A212C2N7	A0A212C2N7	tr|A0A212C2N7|A0A212C2N7_CEREH VDAC3 (Fragment) OS=Cervus elaphus hippelaphus OX=46360 GN=Celaphus_00019378 PE=4 SV=1	1	1	1	1	6.1	23.498		13197000	39299000	9378600	9160300	10120000
A0A212C2P8	A0A212C2P8	tr|A0A212C2P8|A0A212C2P8_CEREH FNTA (Fragment) OS=Cervus elaphus hippelaphus OX=46360 GN=Celaphus_00019386 PE=4 SV=1	1	1	1	1	5.7	37.775						9579600
A0A212C2R0	A0A212C2R0	tr|A0A212C2R0|A0A212C2R0_CEREH Uncharacterized protein OS=Cervus elaphus hippelaphus OX=46360 GN=Celaphus_00015634 PE=4 SV=1	1	1	1	1	9.3	26.861						39409000
A0A212C2R1	A0A212C2R1	tr|A0A212C2R1|A0A212C2R1_CEREH SLC25A4 OS=Cervus elaphus hippelaphus OX=46360 GN=Celaphus_00019253 PE=3 SV=1	1	6	2	6	24.2	32.967	147570000	229090000	301130000	51294000	47758000	71176000
A0A212C2T2	A0A212C2T2	tr|A0A212C2T2|A0A212C2T2_CEREH Uncharacterized protein OS=Cervus elaphus hippelaphus OX=46360 GN=Celaphus_00019369 PE=4 SV=1	1	1	1	1	4	26.561		25585000	31615000
A0A212C2X4	A0A212C2X4	tr|A0A212C2X4|A0A212C2X4_CEREH Uncharacterized protein OS=Cervus elaphus hippelaphus OX=46360 GN=Celaphus_00019367 PE=4 SV=1	1	3	3	3	24.1	24.062		4188600
A0A212C2Z8	A0A212C2Z8	tr|A0A212C2Z8|A0A212C2Z8_CEREH ASAH1 OS=Cervus elaphus hippelaphus OX=46360 GN=Celaphus_00019275 PE=4 SV=1	1	2	2	2	8.1	25.598				10307000
A0A212C320	A0A212C320	tr|A0A212C320|A0A212C320_CEREH Uncharacterized protein OS=Cervus elaphus hippelaphus OX=46360 GN=Celaphus_00019370 PE=4 SV=1	1	2	2	2	3.8	70.023		41230000	20640000
A0A212C369	A0A212C369	tr|A0A212C369|A0A212C369_CEREH CASP3 OS=Cervus elaphus hippelaphus OX=46360 GN=Celaphus_00019247 PE=3 SV=1	1	1	1	1	7.2	28.49		4407500	4849800	3873100	8074500
A0A212C371	A0A212C371	tr|A0A212C371|A0A212C371_CEREH NSUN3 OS=Cervus elaphus hippelaphus OX=46360 GN=Celaphus_00019502 PE=3 SV=1	1	1	1	1	4.1	25.475		150310000	383120000	77987000	196580000
A0A212C394	A0A212C394	tr|A0A212C394|A0A212C394_CEREH ATP6V1A (Fragment) OS=Cervus elaphus hippelaphus OX=46360 GN=Celaphus_00019594 PE=4 SV=1	1	7	7	7	26.5	52.651	51664000	45363000	59512000	33863000	41569000	41283000
A0A212C3C2	A0A212C3C2;A0A212CZ50	tr|A0A212C3C2|A0A212C3C2_CEREH Histone acetyltransferase OS=Cervus elaphus hippelaphus OX=46360 GN=Celaphus_00019372 PE=3 SV=1;tr|A0A212CZ50|A0A212CZ50_CEREH Uncharacterized protein OS=Cervus elaphus hippelaphus OX=46360 GN=Celaphus_00006958 PE=3 SV=1	2	4	4	4	2.4	180.35		44137000	52183000	42350000	51272000	43201000
A0A212C3F8	A0A212C3F8	tr|A0A212C3F8|A0A212C3F8_CEREH CCT8 OS=Cervus elaphus hippelaphus OX=46360 GN=Celaphus_00019454 PE=4 SV=1	1	4	4	4	11.7	44.519			8990700
A0A212C3G0	A0A212C3G0	tr|A0A212C3G0|A0A212C3G0_CEREH Uncharacterized protein OS=Cervus elaphus hippelaphus OX=46360 GN=Celaphus_00019368 PE=4 SV=1	1	3	3	3	11.5	41.094		15821000
A0A212C3I7	A0A212C3I7	tr|A0A212C3I7|A0A212C3I7_CEREH ATP5O (Fragment) OS=Cervus elaphus hippelaphus OX=46360 GN=Celaphus_00019408 PE=3 SV=1	1	3	3	3	19	18.666	57717000	217670000	209820000	80518000	87758000	146590000
A0A212C3L3	A0A212C3L3	tr|A0A212C3L3|A0A212C3L3_CEREH Uncharacterized protein (Fragment) OS=Cervus elaphus hippelaphus OX=46360 GN=Celaphus_00016791 PE=4 SV=1	1	2	2	2	4.5	79.27		8772900	8183300	7623300	8772600	7114300
A0A212C3N0	A0A212C3N0	tr|A0A212C3N0|A0A212C3N0_CEREH Uncharacterized protein OS=Cervus elaphus hippelaphus OX=46360 GN=Celaphus_00019539 PE=4 SV=1	1	6	6	6	35.7	17.779	86429000	162210000	163490000	153250000	151020000	160830000
A0A212C3U9	A0A212C3U9	tr|A0A212C3U9|A0A212C3U9_CEREH TFG (Fragment) OS=Cervus elaphus hippelaphus OX=46360 GN=Celaphus_00019532 PE=4 SV=1	1	2	2	2	30.5	10.89		33197000	56973000	49952000	46936000	43404000
A0A212C3W6	A0A212C3W6;A0A212C3Y7;A0A212C4G2;A0A212C474;A0A212CPL1;A0A212CZI1;A0A212D4I9	tr|A0A212C3W6|A0A212C3W6_CEREH Uncharacterized protein (Fragment) OS=Cervus elaphus hippelaphus OX=46360 GN=Celaphus_00016742 PE=4 SV=1;tr|A0A212C3Y7|A0A212C3Y7_CEREH Uncharacterized protein (Fragment) OS=Cervus elaphus hippelaphus OX=46360 GN=Celaphus_000	7	2	2	2	12.9	13.034	39013000	25896000	19315000
A0A212C3Y1	A0A212C3Y1;A0A212C3F1	tr|A0A212C3Y1|A0A212C3Y1_CEREH RPL21 OS=Cervus elaphus hippelaphus OX=46360 GN=Celaphus_00016634 PE=4 SV=1	2	3	3	3	20.6	18.579		37554000	51299000		39201000	37506000
A0A212C414	A0A212C414	tr|A0A212C414|A0A212C414_CEREH Uncharacterized protein (Fragment) OS=Cervus elaphus hippelaphus OX=46360 GN=Celaphus_00016734 PE=4 SV=1	1	4	2	4	17.1	27.702	117990000	90011000	129850000
A0A212C418	A0A212C418	tr|A0A212C418|A0A212C418_CEREH Uncharacterized protein OS=Cervus elaphus hippelaphus OX=46360 GN=Celaphus_00016527 PE=4 SV=1	1	11	9	11	38.6	41.088	65454000	243520000	250060000	243490000	146600000	145350000
A0A212C465	A0A212C465	tr|A0A212C465|A0A212C465_CEREH PCDH17 OS=Cervus elaphus hippelaphus OX=46360 GN=Celaphus_00016488 PE=4 SV=1	1	2	2	2	2	93.282		97966000
A0A212C4B3	A0A212C4B3	tr|A0A212C4B3|A0A212C4B3_CEREH Uncharacterized protein OS=Cervus elaphus hippelaphus OX=46360 GN=Celaphus_00016693 PE=4 SV=1	1	4	4	4	13.4	33.936	57945000	85841000				96220000
A0A212C4D5	A0A212C4D5	tr|A0A212C4D5|A0A212C4D5_CEREH TPT1 (Fragment) OS=Cervus elaphus hippelaphus OX=46360 GN=Celaphus_00016518 PE=3 SV=1	1	2	2	2	12.4	13.563		75989000		27895000	55502000	38919000
A0A212C4D8	A0A212C4D8;A0A212C4J1;A0A212C4Q8	tr|A0A212C4D8|A0A212C4D8_CEREH Uncharacterized protein (Fragment) OS=Cervus elaphus hippelaphus OX=46360 GN=Celaphus_00016744 PE=4 SV=1;tr|A0A212C4J1|A0A212C4J1_CEREH Uncharacterized protein (Fragment) OS=Cervus elaphus hippelaphus OX=46360 GN=Celaphus_000	3	3	0	1	9.8	37.711	10756000	31892000	30759000
A0A212C4E1	A0A212C4E1	tr|A0A212C4E1|A0A212C4E1_CEREH Uncharacterized protein (Fragment) OS=Cervus elaphus hippelaphus OX=46360 GN=Celaphus_00016753 PE=4 SV=1	1	2	1	1	13	26.602	42247000	45237000	60292000
A0A212C4E9	A0A212C4E9	tr|A0A212C4E9|A0A212C4E9_CEREH POSTN OS=Cervus elaphus hippelaphus OX=46360 GN=Celaphus_00016574 PE=4 SV=1	1	21	5	5	42.9	79.211	192710000	169710000	306090000	204520000	244880000	251880000
A0A212CBH9	A0A212CBH9;A0A212C4F4	tr|A0A212CBH9|A0A212CBH9_CEREH Ferritin (Fragment) OS=Cervus elaphus hippelaphus OX=46360 GN=Celaphus_00007693 PE=3 SV=1;tr|A0A212C4F4|A0A212C4F4_CEREH Uncharacterized protein (Fragment) OS=Cervus elaphus hippelaphus OX=46360 GN=Celaphus_00016822 PE=4 SV=1	2	1	1	1	4	25.408		41549000
A0A212C4F6	A0A212C4F6	tr|A0A212C4F6|A0A212C4F6_CEREH Uncharacterized protein OS=Cervus elaphus hippelaphus OX=46360 GN=Celaphus_00016826 PE=3 SV=1	1	2	2	2	3.4	84.244	155690000	73329000	60668000			64552000
A0A212C4I9	A0A212C4I9	tr|A0A212C4I9|A0A212C4I9_CEREH IPO5 (Fragment) OS=Cervus elaphus hippelaphus OX=46360 GN=Celaphus_00016790 PE=4 SV=1	1	1	1	1	7.3	34.128
A0A212C4P3	A0A212C4P3	tr|A0A212C4P3|A0A212C4P3_CEREH Uncharacterized protein OS=Cervus elaphus hippelaphus OX=46360 GN=Celaphus_00016827 PE=3 SV=1	1	2	2	2	1.2	158.82
A0A212C4P6	A0A212C4P6	tr|A0A212C4P6|A0A212C4P6_CEREH Uncharacterized protein (Fragment) OS=Cervus elaphus hippelaphus OX=46360 GN=Celaphus_00016719 PE=4 SV=1	1	1	1	1	3.2	31.328		21016000	26981000
A0A212C4W5	A0A212C4W5;A0A212CGG7	tr|A0A212C4W5|A0A212C4W5_CEREH Uncharacterized protein OS=Cervus elaphus hippelaphus OX=46360 GN=Celaphus_00016690 PE=4 SV=1;tr|A0A212CGG7|A0A212CGG7_CEREH Calponin OS=Cervus elaphus hippelaphus OX=46360 GN=Celaphus_00002300 PE=3 SV=1	2	2	1	1	11.9	19.942		12597000	20186000
A0A212C4W7	A0A212C4W7;A0A212CU53	tr|A0A212C4W7|A0A212C4W7_CEREH Uncharacterized protein OS=Cervus elaphus hippelaphus OX=46360 GN=Celaphus_00018421 PE=4 SV=1	2	10	10	10	17.4	120.05		38797000	69911000	81964000	76181000	39009000
A0A212C529	A0A212C529	tr|A0A212C529|A0A212C529_CEREH HINT2 OS=Cervus elaphus hippelaphus OX=46360 GN=Celaphus_00018428 PE=4 SV=1	1	1	1	1	10.3	20.669		16279000				9224700
A0A212C541	A0A212C541	tr|A0A212C541|A0A212C541_CEREH Uncharacterized protein OS=Cervus elaphus hippelaphus OX=46360 GN=Celaphus_00018420 PE=3 SV=1	1	12	1	7	28.6	44.449	159650000	222700000	277070000	130960000	161900000	149560000
A0A212C5A0	A0A212C5A0;A0A212CSM0	tr|A0A212C5A0|A0A212C5A0_CEREH ALDH1A1 (Fragment) OS=Cervus elaphus hippelaphus OX=46360 GN=Celaphus_00018372 PE=3 SV=1	2	3	3	3	9.6	52.671		15435000		23841000
A0A212C5F0	A0A212C5F0	tr|A0A212C5F0|A0A212C5F0_CEREH GTP:AMP phosphotransferase AK3, mitochondrial OS=Cervus elaphus hippelaphus OX=46360 GN=AK3 PE=3 SV=1	1	3	3	3	14.5	32.125	18767000	30451000		22479000
A0A212C5F4	A0A212C5F4	tr|A0A212C5F4|A0A212C5F4_CEREH NANS OS=Cervus elaphus hippelaphus OX=46360 GN=Celaphus_00018460 PE=4 SV=1	1	2	2	2	10.1	22.63		13151000	21790000		18623000
A0A212C5F6	A0A212C5F6	tr|A0A212C5F6|A0A212C5F6_CEREH VCP OS=Cervus elaphus hippelaphus OX=46360 GN=Celaphus_00018404 PE=3 SV=1	1	20	20	20	31	92.362	109080000	314790000	361470000	339630000	286690000	476670000
A0A212C5H4	A0A212C5H4;A0A212CM75;A0A212CQA9	tr|A0A212C5H4|A0A212C5H4_CEREH 40S ribosomal protein S6 OS=Cervus elaphus hippelaphus OX=46360 GN=Celaphus_00018263 PE=3 SV=1;tr|A0A212CM75|A0A212CM75_CEREH Uncharacterized protein OS=Cervus elaphus hippelaphus OX=46360 GN=Celaphus_00018487 PE=4 SV=1;tr|A0	3	4	4	4	19.1	28.482		108670000	74689000	51232000	69531000	67172000
A0A212C5J0	A0A212C5J0	tr|A0A212C5J0|A0A212C5J0_CEREH ACO1 (Fragment) OS=Cervus elaphus hippelaphus OX=46360 GN=Celaphus_00018227 PE=4 SV=1	1	2	2	2	7	59.554		12949000	15422000	24284000	25394000	14181000
A0A212C5J8	A0A212C5J8	tr|A0A212C5J8|A0A212C5J8_CEREH GRHPR OS=Cervus elaphus hippelaphus OX=46360 GN=Celaphus_00018439 PE=3 SV=1	1	1	1	1	3.3	53.124
A0A212C5J9	A0A212C5J9	tr|A0A212C5J9|A0A212C5J9_CEREH Clathrin light chain OS=Cervus elaphus hippelaphus OX=46360 GN=Celaphus_00018433 PE=3 SV=1	1	2	2	2	7.4	25.336	24926000		7557300
A0A212C5P6	A0A212C5P6	tr|A0A212C5P6|A0A212C5P6_CEREH ECHDC1 OS=Cervus elaphus hippelaphus OX=46360 GN=Celaphus_00018786 PE=4 SV=1	1	4	4	4	11.9	47.302	218320000	72333000	70525000
A0A212C5Q1	A0A212C5Q1	tr|A0A212C5Q1|A0A212C5Q1_CEREH Annexin OS=Cervus elaphus hippelaphus OX=46360 GN=Celaphus_00018374 PE=3 SV=1	1	16	16	16	53.6	37.621	1003200000	670010000	585550000	661290000	478370000	419930000
A0A212C5S3	A0A212C5S3	tr|A0A212C5S3|A0A212C5S3_CEREH LAMA4 (Fragment) OS=Cervus elaphus hippelaphus OX=46360 GN=Celaphus_00018845 PE=4 SV=1	1	2	2	2	7.8	39.161		35448000	31638000		12361000	14534000
A0A212C5W0	A0A212C5W0	tr|A0A212C5W0|A0A212C5W0_CEREH Uncharacterized protein (Fragment) OS=Cervus elaphus hippelaphus OX=46360 GN=Celaphus_00018732 PE=4 SV=1	1	1	1	1	5.3	26.62			7175300
A0A212C613	A0A212C613	tr|A0A212C613|A0A212C613_CEREH Uncharacterized protein OS=Cervus elaphus hippelaphus OX=46360 GN=Celaphus_00018729 PE=4 SV=1	1	1	1	1	3.9	25.471
A0A212C614	A0A212C614	tr|A0A212C614|A0A212C614_CEREH COX7A2 OS=Cervus elaphus hippelaphus OX=46360 GN=Celaphus_00018753 PE=4 SV=1	1	1	1	1	14.5	7.7978	86037000
A0A212C618	A0A212C618	tr|A0A212C618|A0A212C618_CEREH PGM3 (Fragment) OS=Cervus elaphus hippelaphus OX=46360 GN=Celaphus_00018776 PE=4 SV=1	1	1	1	1	22.1	14.914		7122500	11997000	15382000	17583000	15792000
A0A212C628	A0A212C628	tr|A0A212C628|A0A212C628_CEREH COL12A1 OS=Cervus elaphus hippelaphus OX=46360 GN=Celaphus_00018752 PE=4 SV=1	1	18	18	18	35.4	73.064	1236900000	924120000	997970000	735840000	940890000	579290000
A0A212C632	A0A212C632	tr|A0A212C632|A0A212C632_CEREH LAMA4 (Fragment) OS=Cervus elaphus hippelaphus OX=46360 GN=Celaphus_00018844 PE=4 SV=1	1	1	1	1	5.2	25.415		14672000	9826400
A0A212C669	A0A212C669	tr|A0A212C669|A0A212C669_CEREH COL12A1 OS=Cervus elaphus hippelaphus OX=46360 GN=Celaphus_00018750 PE=4 SV=1	1	25	25	25	31.6	130.7	2814000000	1456200000	1608200000	1388100000	1429300000	1405200000
A0A212C6B1	A0A212C6B1	tr|A0A212C6B1|A0A212C6B1_CEREH Uncharacterized protein OS=Cervus elaphus hippelaphus OX=46360 GN=Celaphus_00018733 PE=4 SV=1	1	7	7	7	18.9	60.601	58057000	159480000	160540000
A0A212C6B7	A0A212C6B7	tr|A0A212C6B7|A0A212C6B7_CEREH Stathmin OS=Cervus elaphus hippelaphus OX=46360 GN=Celaphus_00018718 PE=3 SV=1	1	1	1	1	6.8	13.997			20058000
A0A212C6B8	A0A212C6B8	tr|A0A212C6B8|A0A212C6B8_CEREH LMAN1 (Fragment) OS=Cervus elaphus hippelaphus OX=46360 GN=Celaphus_00017828 PE=4 SV=1	1	3	3	3	9.9	48.39			19356000	20683000
A0A212C6C3	A0A212C6C3;A0A212CEC2	tr|A0A212C6C3|A0A212C6C3_CEREH Uncharacterized protein OS=Cervus elaphus hippelaphus OX=46360 GN=Celaphus_00017666 PE=4 SV=1;tr|A0A212CEC2|A0A212CEC2_CEREH Uncharacterized protein (Fragment) OS=Cervus elaphus hippelaphus OX=46360 GN=Celaphus_00016166 PE=4	2	3	3	3	23.2	16.234	114440000	98141000	110540000	91089000	55259000	59536000
A0A212C6F7	A0A212C6F7	tr|A0A212C6F7|A0A212C6F7_CEREH ATP synthase subunit alpha (Fragment) OS=Cervus elaphus hippelaphus OX=46360 GN=Celaphus_00017759 PE=3 SV=1	1	14	14	14	40.8	42.461	902490000	695370000	724500000	459210000	620910000	540950000
A0A212C6H9	A0A212C6H9	tr|A0A212C6H9|A0A212C6H9_CEREH COLEC12 (Fragment) OS=Cervus elaphus hippelaphus OX=46360 GN=Celaphus_00017677 PE=4 SV=1	1	1	1	1	3.1	43.924		33111000
A0A212C6J5	A0A212C6J5	tr|A0A212C6J5|A0A212C6J5_CEREH CYB5A (Fragment) OS=Cervus elaphus hippelaphus OX=46360 GN=Celaphus_00017573 PE=4 SV=1	1	2	2	2	34.7	10.619	82125000	148900000	142890000	147730000	111540000	140660000
A0A212C6M9	A0A212C6M9	tr|A0A212C6M9|A0A212C6M9_CEREH MYL12B OS=Cervus elaphus hippelaphus OX=46360 GN=Celaphus_00017690 PE=4 SV=1	1	4	0	1	34.5	13.61	21307000
A0A212C6P2	A0A212C6P2	tr|A0A212C6P2|A0A212C6P2_CEREH Tubulin beta chain OS=Cervus elaphus hippelaphus OX=46360 GN=Celaphus_00017732 PE=3 SV=1	1	10	1	1	31.3	44.626		10171000
A0A212C6V6	A0A212C6V6	tr|A0A212C6V6|A0A212C6V6_CEREH CDH2 (Fragment) OS=Cervus elaphus hippelaphus OX=46360 GN=Celaphus_00017639 PE=4 SV=1	1	1	1	1	5.9	48.744		13001000	15983000	24299000		25845000
A0A212C6Y8	A0A212C6Y8	tr|A0A212C6Y8|A0A212C6Y8_CEREH Transthyretin OS=Cervus elaphus hippelaphus OX=46360 GN=Celaphus_00017633 PE=3 SV=1	1	6	6	6	53.1	15.969	585640000	1150700000	1691700000	2674400000	3326600000	2483700000
A0A212C756	A0A212C756	tr|A0A212C756|A0A212C756_CEREH ACAA2 OS=Cervus elaphus hippelaphus OX=46360 GN=Celaphus_00017784 PE=3 SV=1	1	3	3	3	10.1	42.02	48352000	27698000	26039000
A0A212C784	A0A212C784	tr|A0A212C784|A0A212C784_CEREH Uncharacterized protein OS=Cervus elaphus hippelaphus OX=46360 GN=Celaphus_00017689 PE=4 SV=1	1	5	2	5	33.3	20.081	68704000	170150000	168340000	61828000	93342000	67302000
A0A212C794	A0A212C794	tr|A0A212C794|A0A212C794_CEREH NT5E (Fragment) OS=Cervus elaphus hippelaphus OX=46360 GN=Celaphus_00018966 PE=4 SV=1	1	1	1	1	3.7	26.637
A0A212C7H7	A0A212C7H7	tr|A0A212C7H7|A0A212C7H7_CEREH Uncharacterized protein OS=Cervus elaphus hippelaphus OX=46360 GN=Celaphus_00017772 PE=4 SV=1	1	1	1	1	6	21.778	26009000		18681000
A0A212C7I8	A0A212C7I8	tr|A0A212C7I8|A0A212C7I8_CEREH CNDP2 OS=Cervus elaphus hippelaphus OX=46360 GN=Celaphus_00017570 PE=4 SV=1	1	4	4	4	13.4	47.192		35269000	30372000	44080000	53839000	39673000
A0A212C7M4	A0A212C7M4;A0A212D3I1	tr|A0A212C7M4|A0A212C7M4_CEREH Uncharacterized protein OS=Cervus elaphus hippelaphus OX=46360 GN=Celaphus_00018963 PE=4 SV=1	2	5	5	5	9.2	69.375	62668000	33617000	60553000	47795000	46268000	56453000
A0A212C7N0	A0A212C7N0	tr|A0A212C7N0|A0A212C7N0_CEREH PSMB1 OS=Cervus elaphus hippelaphus OX=46360 GN=Celaphus_00019197 PE=4 SV=1	1	7	7	7	50.2	22.448	102690000	75364000	45814000		56945000	82145000
A0A212C7N9	A0A212C7N9	tr|A0A212C7N9|A0A212C7N9_CEREH EZR (Fragment) OS=Cervus elaphus hippelaphus OX=46360 GN=Celaphus_00019145 PE=4 SV=1	1	2	2	2	36.6	9.7222	17934000	48480000	54269000	132350000	98410000	106020000
A0A212C7P2	A0A212C7P2	tr|A0A212C7P2|A0A212C7P2_CEREH PLG (Fragment) OS=Cervus elaphus hippelaphus OX=46360 GN=Celaphus_00019151 PE=3 SV=1	1	21	14	21	34.9	78.534	573960000	340110000	392380000	205330000	237010000	239290000
A0A212C7S5	A0A212C7S5	tr|A0A212C7S5|A0A212C7S5_CEREH Uncharacterized protein (Fragment) OS=Cervus elaphus hippelaphus OX=46360 GN=Celaphus_00019117 PE=4 SV=1	1	1	1	1	2.4	42.093			21677000	15335000
A0A212C7U2	A0A212C7U2;A0A212D0N3	tr|A0A212C7U2|A0A212C7U2_CEREH 40S ribosomal protein S12 OS=Cervus elaphus hippelaphus OX=46360 GN=Celaphus_00019006 PE=3 SV=1	2	7	7	7	69.7	14.515	107090000	185300000	167560000	169130000	138370000	181900000
A0A212C7U4	A0A212C7U4	tr|A0A212C7U4|A0A212C7U4_CEREH Superoxide dismutase OS=Cervus elaphus hippelaphus OX=46360 GN=Celaphus_00019162 PE=3 SV=1	1	4	4	4	26.2	19.266		37494000	52116000	55694000	59075000	28412000
A0A212C7V5	A0A212C7V5	tr|A0A212C7V5|A0A212C7V5_CEREH Uncharacterized protein OS=Cervus elaphus hippelaphus OX=46360 GN=Celaphus_00018969 PE=4 SV=1	1	2	1	1	4.3	51.599	84650000	38785000	28068000	35919000		25022000
A0A212C7X7	A0A212C7X7	tr|A0A212C7X7|A0A212C7X7_CEREH Uncharacterized protein OS=Cervus elaphus hippelaphus OX=46360 GN=Celaphus_00018149 PE=4 SV=1	1	3	3	3	38.3	14.242	26782000	21920000	29133000	23694000	44765000	16578000
A0A212C7Y2	A0A212C7Y2	tr|A0A212C7Y2|A0A212C7Y2_CEREH PCMT1 OS=Cervus elaphus hippelaphus OX=46360 GN=Celaphus_00019083 PE=4 SV=1	1	3	3	3	37	18.788		27296000	27553000	17174000		36139000
A0A212C806	A0A212C806	tr|A0A212C806|A0A212C806_CEREH CCT5 OS=Cervus elaphus hippelaphus OX=46360 GN=Celaphus_00018115 PE=3 SV=1	1	2	2	2	5.5	60.097		8785700			24598000	12048000
A0A212C811	A0A212C811	tr|A0A212C811|A0A212C811_CEREH ACAT2 OS=Cervus elaphus hippelaphus OX=46360 GN=Celaphus_00019160 PE=3 SV=1	1	4	4	4	14.8	47.523		41731000	21443000	26721000	43214000	55182000
A0A212C826	A0A212C826	tr|A0A212C826|A0A212C826_CEREH C6 OS=Cervus elaphus hippelaphus OX=46360 GN=Celaphus_00018030 PE=4 SV=1	1	1	1	1	22.5	8.8828		7013400	8857300			45161000
A0A212C842	A0A212C842	tr|A0A212C842|A0A212C842_CEREH Uncharacterized protein (Fragment) OS=Cervus elaphus hippelaphus OX=46360 GN=Celaphus_00018992 PE=4 SV=1	1	1	1	1	12.7	14.379		17262000	30640000			19022000
A0A212C846	A0A212C846	tr|A0A212C846|A0A212C846_CEREH C9 (Fragment) OS=Cervus elaphus hippelaphus OX=46360 GN=Celaphus_00018042 PE=4 SV=1	1	2	2	2	7.7	31.25	71743000	31868000	31733000	29085000		28122000
A0A212CLT3	A0A212CLT3;A0A212C879;A0A212CL50	tr|A0A212CLT3|A0A212CLT3_CEREH Uncharacterized protein (Fragment) OS=Cervus elaphus hippelaphus OX=46360 GN=Celaphus_00012422 PE=4 SV=1;tr|A0A212C879|A0A212C879_CEREH NPM1 OS=Cervus elaphus hippelaphus OX=46360 GN=Celaphus_00017876 PE=4 SV=1	3	7	7	7	34.3	27.328		55488000	63173000	33730000	41727000	22528000
A0A212C899	A0A212C899	tr|A0A212C899|A0A212C899_CEREH TCP1 OS=Cervus elaphus hippelaphus OX=46360 GN=Celaphus_00019159 PE=3 SV=1	1	2	2	2	6	51.901		11096000		9780800
A0A212C8D3	A0A212C8D3	tr|A0A212C8D3|A0A212C8D3_CEREH Uncharacterized protein (Fragment) OS=Cervus elaphus hippelaphus OX=46360 GN=Celaphus_00018031 PE=4 SV=1	1	1	1	1	0.8	122.24			26581000		50768000
A0A212C8F9	A0A212C8F9	tr|A0A212C8F9|A0A212C8F9_CEREH NNT (Fragment) OS=Cervus elaphus hippelaphus OX=46360 GN=Celaphus_00018012 PE=4 SV=1	1	1	1	1	9.3	19.766	13590000	30569000	30585000
A0A212C8H6	A0A212C8H6	tr|A0A212C8H6|A0A212C8H6_CEREH Succinate dehydrogenase [ubiquinone] flavoprotein subunit, mitochondrial OS=Cervus elaphus hippelaphus OX=46360 GN=Celaphus_00018150 PE=3 SV=1	1	2	2	2	4.1	61.704		20470000	15037000	9978400	8230500	13910000
A0A212C8H8	A0A212C8H8	tr|A0A212C8H8|A0A212C8H8_CEREH TARS OS=Cervus elaphus hippelaphus OX=46360 GN=Celaphus_00018077 PE=3 SV=1	1	3	3	3	7.1	83.489		10346000			12814000
A0A212C8K3	A0A212C8K3	tr|A0A212C8K3|A0A212C8K3_CEREH SUB1 OS=Cervus elaphus hippelaphus OX=46360 GN=Celaphus_00018079 PE=4 SV=1	1	3	3	3	29.9	14.404	34772000	19729000	22420000
A0A212C8L5	A0A212C8L5	tr|A0A212C8L5|A0A212C8L5_CEREH Uncharacterized protein (Fragment) OS=Cervus elaphus hippelaphus OX=46360 GN=Celaphus_00018051 PE=4 SV=1	1	1	1	1	1.4	169.96	254860000		473510000	661590000	748870000	644250000
A0A212C8P0	A0A212C8P0	tr|A0A212C8P0|A0A212C8P0_CEREH Glutathione peroxidase OS=Cervus elaphus hippelaphus OX=46360 GN=Celaphus_00017986 PE=3 SV=1	1	3	3	3	17.8	29.382		34753000	28761000
A0A212C8U9	A0A212C8U9	tr|A0A212C8U9|A0A212C8U9_CEREH ITIH1 OS=Cervus elaphus hippelaphus OX=46360 GN=Celaphus_00010456 PE=4 SV=1	1	9	4	4	59.9	20.139		61347000	175330000	299060000	233060000	247480000
A8QJ91	A8QJ91;A0A212C928;A0A212C8V2	tr|A8QJ91|A8QJ91_CEREL Bactenecin (Fragment) OS=Cervus elaphus hispanicus OX=141655 PE=2 SV=1;tr|A0A212C928|A0A212C928_CEREH Uncharacterized protein OS=Cervus elaphus hippelaphus OX=46360 GN=Celaphus_00010585 PE=3 SV=1;tr|A0A212C8V2|A0A212C8V2_CEREH CATHL2	3	1	1	1	20.5	4.5279				22181000
A0A212C8Y6	A0A212C8Y6	tr|A0A212C8Y6|A0A212C8Y6_CEREH APEH OS=Cervus elaphus hippelaphus OX=46360 GN=Celaphus_00010565 PE=4 SV=1	1	1	1	1	2.1	81.011
A0A212C8Z7	A0A212C8Z7	tr|A0A212C8Z7|A0A212C8Z7_CEREH LTF OS=Cervus elaphus hippelaphus OX=46360 GN=Celaphus_00010614 PE=4 SV=1	1	1	1	1	11.3	13.159
A0A212C8Z8	A0A212C8Z8	tr|A0A212C8Z8|A0A212C8Z8_CEREH RAB7A OS=Cervus elaphus hippelaphus OX=46360 GN=Celaphus_00010683 PE=4 SV=1	1	3	3	3	26.4	16.088		19280000	15038000		19196000	34027000
A0A212C909	A0A212C909	tr|A0A212C909|A0A212C909_CEREH Microtubule-associated protein OS=Cervus elaphus hippelaphus OX=46360 GN=Celaphus_00010591 PE=4 SV=1	1	3	3	3	5.7	78.591	57822000	16689000
A0A212C915	A0A212C915	tr|A0A212C915|A0A212C915_CEREH FLNB OS=Cervus elaphus hippelaphus OX=46360 GN=Celaphus_00010412 PE=4 SV=1	1	2	2	2	5.4	40.796
A0A212C922	A0A212C922	tr|A0A212C922|A0A212C922_CEREH ITIH1 (Fragment) OS=Cervus elaphus hippelaphus OX=46360 GN=Celaphus_00010455 PE=4 SV=1	1	11	6	6	57.4	32.305	77612000	309130000	390810000	540870000	571360000	690700000
A0A212C923	A0A212C923	tr|A0A212C923|A0A212C923_CEREH AZI2 OS=Cervus elaphus hippelaphus OX=46360 GN=Celaphus_00010194 PE=4 SV=1	1	1	1	1	4.4	41.849				36333000	29576000
A0A212C934	A0A212C934	tr|A0A212C934|A0A212C934_CEREH RHOA (Fragment) OS=Cervus elaphus hippelaphus OX=46360 GN=Celaphus_00010518 PE=4 SV=1	1	2	1	2	20	14.896		31904000	27846000		23573000	38002000
A0A212C941	A0A212C941	tr|A0A212C941|A0A212C941_CEREH RPSA (Fragment) OS=Cervus elaphus hippelaphus OX=46360 GN=Celaphus_00010271 PE=4 SV=1	1	7	7	7	58.7	22.798	180420000	394410000	403850000	356980000	380840000	415940000
A0A212C973	A0A212C973	tr|A0A212C973|A0A212C973_CEREH PRA1 family protein OS=Cervus elaphus hippelaphus OX=46360 GN=Celaphus_00010374 PE=3 SV=1	1	1	1	1	15.4	13.996		23055000	38547000	17754000	15300000
A0A212C977	A0A212C977	tr|A0A212C977|A0A212C977_CEREH Glutathione peroxidase OS=Cervus elaphus hippelaphus OX=46360 GN=Celaphus_00010517 PE=3 SV=1	1	5	5	5	47.2	16.286	25432000	18372000	30174000	48376000	23409000	16916000
A0A212C982	A0A212C982	tr|A0A212C982|A0A212C982_CEREH GNAI2 OS=Cervus elaphus hippelaphus OX=46360 GN=Celaphus_00010546 PE=4 SV=1	1	3	3	3	11.6	38.646	24709000	23944000	39901000		26128000
A0A212C9A4	A0A212C9A4	tr|A0A212C9A4|A0A212C9A4_CEREH MAP4 (Fragment) OS=Cervus elaphus hippelaphus OX=46360 GN=Celaphus_00010590 PE=4 SV=1	1	3	3	3	2.9	157.65		44200000		72043000	41592000
A0A212C9D9	A0A212C9D9	tr|A0A212C9D9|A0A212C9D9_CEREH Dolichyl-diphosphooligosaccharide--protein glycosyltransferase subunit 1 OS=Cervus elaphus hippelaphus OX=46360 GN=Celaphus_00010684 PE=3 SV=1	1	6	6	6	20.7	38.39	31782000	86996000	54591000	32055000	16559000	21423000
A0A212C9E7	A0A212C9E7	tr|A0A212C9E7|A0A212C9E7_CEREH Uncharacterized protein OS=Cervus elaphus hippelaphus OX=46360 GN=Celaphus_00010687 PE=3 SV=1	1	1	1	1	3.7	29.718
A0A212C9F8	A0A212C9F8	tr|A0A212C9F8|A0A212C9F8_CEREH Uncharacterized protein OS=Cervus elaphus hippelaphus OX=46360 GN=Celaphus_00010679 PE=4 SV=1	1	1	1	1	10.8	10.067
A0A212C9G3	A0A212C9G3	tr|A0A212C9G3|A0A212C9G3_CEREH TKT OS=Cervus elaphus hippelaphus OX=46360 GN=Celaphus_00010446 PE=4 SV=1	1	11	11	11	35.2	52.607	145360000	97964000	123230000	111620000	143920000	177490000
A0A212C9G6	A0A212C9G6	tr|A0A212C9G6|A0A212C9G6_CEREH FLNB (Fragment) OS=Cervus elaphus hippelaphus OX=46360 GN=Celaphus_00010414 PE=4 SV=1	1	1	1	1	12.3	12.015
A0A212C9H1	A0A212C9H1	tr|A0A212C9H1|A0A212C9H1_CEREH PDHB (Fragment) OS=Cervus elaphus hippelaphus OX=46360 GN=Celaphus_00010408 PE=4 SV=1	1	1	1	1	2.6	45.361		15479000	12761000
A0A212C9I4	A0A212C9I4	tr|A0A212C9I4|A0A212C9I4_CEREH MGLL (Fragment) OS=Cervus elaphus hippelaphus OX=46360 GN=Celaphus_00010689 PE=4 SV=1	1	3	3	3	17.2	22.878		47544000	70194000
A0A212C9J5	A0A212C9J5	tr|A0A212C9J5|A0A212C9J5_CEREH ITIH3 OS=Cervus elaphus hippelaphus OX=46360 GN=Celaphus_00010453 PE=4 SV=1	1	11	4	11	16.3	89.762	95945000	136790000	109900000	196270000	156570000	224160000
A0A212C9K1	A0A212C9K1	tr|A0A212C9K1|A0A212C9K1_CEREH Uncharacterized protein OS=Cervus elaphus hippelaphus OX=46360 GN=Celaphus_00010598 PE=3 SV=1	1	1	1	1	6.8	21.249					19791000	20258000
A0A212C9M8	A0A212C9M8	tr|A0A212C9M8|A0A212C9M8_CEREH Uncharacterized protein OS=Cervus elaphus hippelaphus OX=46360 GN=Celaphus_00010324 PE=4 SV=1	1	4	4	4	13.7	29.411	135770000	84602000	94871000	74962000	52136000	75842000
A0A212C9P1	A0A212C9P1	tr|A0A212C9P1|A0A212C9P1_CEREH PLCD1 OS=Cervus elaphus hippelaphus OX=46360 GN=Celaphus_00010244 PE=4 SV=1	1	2	2	2	4.3	73.969			30871000
A0A212C9P4	A0A212C9P4	tr|A0A212C9P4|A0A212C9P4_CEREH Uncharacterized protein (Fragment) OS=Cervus elaphus hippelaphus OX=46360 GN=Celaphus_00010230 PE=4 SV=1	1	1	1	1	2.3	52.217
A0A212C9S0	A0A212C9S0	tr|A0A212C9S0|A0A212C9S0_CEREH FLNB OS=Cervus elaphus hippelaphus OX=46360 GN=Celaphus_00010416 PE=4 SV=1	1	6	5	6	4.1	199.93	38380000	25853000	23585000	32953000	30823000	50561000
A0A212C9U7	A0A212C9U7	tr|A0A212C9U7|A0A212C9U7_CEREH TMEM43 OS=Cervus elaphus hippelaphus OX=46360 GN=Celaphus_00010668 PE=4 SV=1	1	2	2	2	9.9	40.947
A0A212C9V5	A0A212C9V5	tr|A0A212C9V5|A0A212C9V5_CEREH LTF OS=Cervus elaphus hippelaphus OX=46360 GN=Celaphus_00010613 PE=4 SV=1	1	8	5	5	16.4	59.517			33713000	38783000	53502000	35581000
A0A212C9V7	A0A212C9V7	tr|A0A212C9V7|A0A212C9V7_CEREH Uncharacterized protein OS=Cervus elaphus hippelaphus OX=46360 GN=Celaphus_00010672 PE=4 SV=1	1	2	2	2	5.5	66.268		13616000	8364600
A0A212C9W1	A0A212C9W1	tr|A0A212C9W1|A0A212C9W1_CEREH PSMD6 OS=Cervus elaphus hippelaphus OX=46360 GN=Celaphus_00010388 PE=4 SV=1	1	1	1	1	3.8	45.268		15062000	12115000	14744000	22794000	15512000
A0A212C9X2	A0A212C9X2	tr|A0A212C9X2|A0A212C9X2_CEREH QARS OS=Cervus elaphus hippelaphus OX=46360 GN=Celaphus_00010505 PE=3 SV=1	1	2	2	2	4.4	83.862		6359400	15968000		7082100
A0A212C9X7	A0A212C9X7;A0A212C9I7	tr|A0A212C9X7|A0A212C9X7_CEREH Uncharacterized protein OS=Cervus elaphus hippelaphus OX=46360 GN=Celaphus_00010227 PE=3 SV=1;tr|A0A212C9I7|A0A212C9I7_CEREH Uncharacterized protein OS=Cervus elaphus hippelaphus OX=46360 GN=Celaphus_00010228 PE=4 SV=1	2	4	2	3	14.1	29.693	386560000	240510000	401150000	396520000	422590000	391300000
A0A212C9Z3	A0A212C9Z3	tr|A0A212C9Z3|A0A212C9Z3_CEREH ABHD14B OS=Cervus elaphus hippelaphus OX=46360 GN=Celaphus_00010485 PE=4 SV=1	1	2	2	2	11.9	22.44		17374000	18795000		16149000
A0A212C9Z8	A0A212C9Z8	tr|A0A212C9Z8|A0A212C9Z8_CEREH KIF15 OS=Cervus elaphus hippelaphus OX=46360 GN=Celaphus_00010309 PE=3 SV=1	1	1	1	1	0.7	159.13	17257000
A0A212CA05	A0A212CA05	tr|A0A212CA05|A0A212CA05_CEREH UQCRC1 (Fragment) OS=Cervus elaphus hippelaphus OX=46360 GN=Celaphus_00010572 PE=4 SV=1	1	1	1	1	12.8	24.826		22770000	17337000
A0A212CA55	A0A212CA55;A0A212C9D8	tr|A0A212CA55|A0A212CA55_CEREH COPG1 OS=Cervus elaphus hippelaphus OX=46360 GN=Celaphus_00010680 PE=4 SV=1	2	8	8	8	19	67.798	41419000	82782000	112430000	94501000	76985000	75113000
A0A212CA59	A0A212CA59	tr|A0A212CA59|A0A212CA59_CEREH Uncharacterized protein OS=Cervus elaphus hippelaphus OX=46360 GN=Celaphus_00010666 PE=4 SV=1	1	2	2	2	19.6	11.845		38442000	31578000
A0A212CA95	A0A212CA95	tr|A0A212CA95|A0A212CA95_CEREH Uncharacterized protein (Fragment) OS=Cervus elaphus hippelaphus OX=46360 GN=Celaphus_00010573 PE=4 SV=1	1	1	1	1	0.3	305.41		102200000	3523200	5392600		253800000
A0A212CAA8	A0A212CAA8	tr|A0A212CAA8|A0A212CAA8_CEREH MYL9 (Fragment) OS=Cervus elaphus hippelaphus OX=46360 GN=Celaphus_00007957 PE=4 SV=1	1	3	1	1	31.7	14.355			7322400
A0A212CAB6	A0A212CAB6	tr|A0A212CAB6|A0A212CAB6_CEREH ACAA1 OS=Cervus elaphus hippelaphus OX=46360 GN=Celaphus_00010248 PE=4 SV=1	1	1	1	1	16.3	13.032		1929500	3452200
A0A212CAC6	A0A212CAC6;A0A212CHR2	tr|A0A212CAC6|A0A212CAC6_CEREH GNAT1 OS=Cervus elaphus hippelaphus OX=46360 GN=Celaphus_00010548 PE=4 SV=1;tr|A0A212CHR2|A0A212CHR2_CEREH GNAT2 OS=Cervus elaphus hippelaphus OX=46360 GN=Celaphus_00002228 PE=4 SV=1	2	1	1	1	3.1	39.979	20030000
A0A212CAC7	A0A212CAC7	tr|A0A212CAC7|A0A212CAC7_CEREH PTGIS OS=Cervus elaphus hippelaphus OX=46360 GN=Celaphus_00008073 PE=3 SV=1	1	1	1	1	12.1	15.463		8435100
A0A212CAC8	A0A212CAC8	tr|A0A212CAC8|A0A212CAC8_CEREH VIM OS=Cervus elaphus hippelaphus OX=46360 GN=Celaphus_00007529 PE=3 SV=1	1	35	32	35	78	48.596	25372000000	18682000000	17850000000	11792000000	11701000000	11887000000
A0A212CAD5	A0A212CAD5;A0A212C227	tr|A0A212CAD5|A0A212CAD5_CEREH APMAP OS=Cervus elaphus hippelaphus OX=46360 GN=Celaphus_00007608 PE=4 SV=1	2	6	6	6	18.6	46.395	19760000	37879000	109530000	28510000	31439000	34038000
A0A212CAD9	A0A212CAD9	tr|A0A212CAD9|A0A212CAD9_CEREH MANF OS=Cervus elaphus hippelaphus OX=46360 GN=Celaphus_00010528 PE=4 SV=1	1	4	4	4	25.7	20.325		22133000	21686000	21497000	22819000
A0A212CAE3	A0A212CAE3;A0A212CRF4	tr|A0A212CAE3|A0A212CAE3_CEREH DSTN OS=Cervus elaphus hippelaphus OX=46360 GN=Celaphus_00007571 PE=3 SV=1;tr|A0A212CRF4|A0A212CRF4_CEREH Uncharacterized protein OS=Cervus elaphus hippelaphus OX=46360 GN=Celaphus_00010791 PE=3 SV=1	2	5	4	5	24.9	22.997	213290000	194240000	156240000	47578000	114680000	65069000
A0A212CAH5	A0A212CAH5	tr|A0A212CAH5|A0A212CAH5_CEREH Rab GDP dissociation inhibitor (Fragment) OS=Cervus elaphus hippelaphus OX=46360 GN=Celaphus_00007620 PE=3 SV=1	1	16	13	16	48.7	43.752	473260000	325790000	437410000	472120000	520030000	577820000
A0A212CAJ2	A0A212CAJ2	tr|A0A212CAJ2|A0A212CAJ2_CEREH CSE1L OS=Cervus elaphus hippelaphus OX=46360 GN=Celaphus_00008068 PE=4 SV=1	1	2	2	2	3.4	110.65				2882400000	103930000	196500000
A0A212CAK0	A0A212CAK0	tr|A0A212CAK0|A0A212CAK0_CEREH ATP synthase subunit gamma OS=Cervus elaphus hippelaphus OX=46360 GN=Celaphus_00007449 PE=3 SV=1	1	4	4	4	14.4	38.74	80471000	80302000	74526000	12017000		65364000
A0A212CAL2	A0A212CAL2;A0A212DFC1;A0A212C457;A0A212D233	tr|A0A212CAL2|A0A212CAL2_CEREH Elongation factor 1-alpha OS=Cervus elaphus hippelaphus OX=46360 GN=Celaphus_00007740 PE=3 SV=1	4	7	1	2	20.2	50.163	238710000		128650000	70651000	101900000	158170000
A0A212CAP9	A0A212CAP9	tr|A0A212CAP9|A0A212CAP9_CEREH PTGIS (Fragment) OS=Cervus elaphus hippelaphus OX=46360 GN=Celaphus_00008074 PE=4 SV=1	1	1	1	1	5.2	26.11			23495000
A0A212CAS3	A0A212CAS3	tr|A0A212CAS3|A0A212CAS3_CEREH Peptidylprolyl isomerase (Fragment) OS=Cervus elaphus hippelaphus OX=46360 GN=Celaphus_00007828 PE=4 SV=1	1	2	2	2	58.2	8.806		40642000	31454000	63457000	34761000	36422000
A0A212CAT6	A0A212CAT6	tr|A0A212CAT6|A0A212CAT6_CEREH PSMF1 OS=Cervus elaphus hippelaphus OX=46360 GN=Celaphus_00007833 PE=4 SV=1	1	1	1	1	15.8	11.12	16449000	36422000	21048000	39151000	60304000	49028000
A0A212CAT7	A0A212CAT7	tr|A0A212CAT7|A0A212CAT7_CEREH Adenosylhomocysteinase OS=Cervus elaphus hippelaphus OX=46360 GN=Celaphus_00007907 PE=3 SV=1	1	11	11	11	30.6	47.751	16443000	156570000	142390000	21694000	12477000	23893000
A0A212CAU1	A0A212CAU1	tr|A0A212CAU1|A0A212CAU1_CEREH CPNE1 OS=Cervus elaphus hippelaphus OX=46360 GN=Celaphus_00007937 PE=4 SV=1	1	1	1	1	3.9	55.765
A0A212CAW0	A0A212CAW0	tr|A0A212CAW0|A0A212CAW0_CEREH MAPRE1 OS=Cervus elaphus hippelaphus OX=46360 GN=Celaphus_00007872 PE=4 SV=1	1	2	2	2	8.2	30.051		21826000	15929000	21200000	13152000	11063000
A0A212CAX0	A0A212CAX0	tr|A0A212CAX0|A0A212CAX0_CEREH 40S ribosomal protein S21 OS=Cervus elaphus hippelaphus OX=46360 GN=Celaphus_00007763 PE=3 SV=1	1	2	2	2	22.9	9.1113			8592000
A0A212CAX6	A0A212CAX6	tr|A0A212CAX6|A0A212CAX6_CEREH PLTP OS=Cervus elaphus hippelaphus OX=46360 GN=Celaphus_00008043 PE=4 SV=1	1	5	5	5	16.7	42.016	85722000	35316000	43512000	46655000	26981000	44925000
A0A212CB75	A0A212CB75	tr|A0A212CB75|A0A212CB75_CEREH RSU1 (Fragment) OS=Cervus elaphus hippelaphus OX=46360 GN=Celaphus_00007524 PE=4 SV=1	1	3	3	3	22.6	17.582		34594000	28879000
A0A212CBB4	A0A212CBB4	tr|A0A212CBB4|A0A212CBB4_CEREH Glutathione synthetase OS=Cervus elaphus hippelaphus OX=46360 GN=Celaphus_00007917 PE=3 SV=1	1	1	1	1	3.9	47.109
A0A212CBC1	A0A212CBC1	tr|A0A212CBC1|A0A212CBC1_CEREH NSFL1C OS=Cervus elaphus hippelaphus OX=46360 GN=Celaphus_00007827 PE=4 SV=1	1	2	2	2	6.4	37.944	13185000	10520000	13505000
A0A212CBC5	A0A212CBC5;A0A212CEA2	tr|A0A212CBC5|A0A212CBC5_CEREH RPN2 OS=Cervus elaphus hippelaphus OX=46360 GN=Celaphus_00007962 PE=4 SV=1	2	6	6	6	20.7	45.805		97672000	86160000	91793000	77327000	82617000
A0A212CBD3	A0A212CBD3	tr|A0A212CBD3|A0A212CBD3_CEREH Uncharacterized protein OS=Cervus elaphus hippelaphus OX=46360 GN=Celaphus_00007572 PE=4 SV=1	1	35	35	35	40.9	120.61	937610000	731670000	852380000	1035100000	1017300000	889870000
A0A212CBF2	A0A212CBF2	tr|A0A212CBF2|A0A212CBF2_CEREH Uncharacterized protein (Fragment) OS=Cervus elaphus hippelaphus OX=46360 GN=Celaphus_00007909 PE=4 SV=1	1	2	2	2	34.7	10.858	61602000	31193000	27344000
A0A212CBJ4	A0A212CBJ4	tr|A0A212CBJ4|A0A212CBJ4_CEREH Proteasome subunit alpha type OS=Cervus elaphus hippelaphus OX=46360 GN=Celaphus_00007771 PE=3 SV=1	1	7	7	7	34.7	29.66	79723000	100810000	99124000	77057000	75418000	86695000
A0A212CBP5	A0A212CBP5	tr|A0A212CBP5|A0A212CBP5_CEREH SLC12A5 OS=Cervus elaphus hippelaphus OX=46360 GN=Celaphus_00008048 PE=4 SV=1	1	1	1	1	1.7	121.4		1028800000	1651100000	265030000	2938900000	7082800000
A0A212CBQ8	A0A212CBQ8	tr|A0A212CBQ8|A0A212CBQ8_CEREH TGM2 OS=Cervus elaphus hippelaphus OX=46360 GN=Celaphus_00007968 PE=4 SV=1	1	4	4	4	10.9	44.468		12758000
A0A212CBX0	A0A212CBX0	tr|A0A212CBX0|A0A212CBX0_CEREH Integrin beta (Fragment) OS=Cervus elaphus hippelaphus OX=46360 GN=Celaphus_00007481 PE=3 SV=1	1	2	2	2	13.3	25.437		18914000	20393000		18882000
A0A212CBZ2	A0A212CBZ2	tr|A0A212CBZ2|A0A212CBZ2_CEREH YWHAB (Fragment) OS=Cervus elaphus hippelaphus OX=46360 GN=Celaphus_00008004 PE=4 SV=1	1	4	3	3	36.2	11.905	223550000	241570000	184990000	178590000	267620000	202200000
A0A212CC12	A0A212CC12	tr|A0A212CC12|A0A212CC12_CEREH ITIH2 (Fragment) OS=Cervus elaphus hippelaphus OX=46360 GN=Celaphus_00007451 PE=4 SV=1	1	21	8	21	32.5	103.33	1823100000	1416600000	1544700000	1750500000	1439800000	1435000000
A0A212CC82	A0A212CC82	tr|A0A212CC82|A0A212CC82_CEREH Uncharacterized protein (Fragment) OS=Cervus elaphus hippelaphus OX=46360 GN=Celaphus_00014012 PE=4 SV=1	1	1	1	1	3	44.782		9267800		33865000
A0A212CCB7	A0A212CCB7	tr|A0A212CCB7|A0A212CCB7_CEREH PPARA OS=Cervus elaphus hippelaphus OX=46360 GN=Celaphus_00013689 PE=3 SV=1	1	1	1	1	5	45.326		60880000
A0A212CCE9	A0A212CCE9	tr|A0A212CCE9|A0A212CCE9_CEREH MGST1 (Fragment) OS=Cervus elaphus hippelaphus OX=46360 GN=Celaphus_00014035 PE=4 SV=1	1	1	1	1	18.3	8.1464		23779000	19980000
A0A212CCG8	A0A212CCG8	tr|A0A212CCG8|A0A212CCG8_CEREH GOLT1B OS=Cervus elaphus hippelaphus OX=46360 GN=Celaphus_00014045 PE=4 SV=1	1	1	1	1	10.1	15.425	22063000	26396000	15554000	11192000		16807000
A0A212CCI7	A0A212CCI7	tr|A0A212CCI7|A0A212CCI7_CEREH GAPDH OS=Cervus elaphus hippelaphus OX=46360 GN=Celaphus_00013909 PE=4 SV=1	1	9	3	3	57.3	22.238		262850000	218280000	157080000	305200000	301490000
A0A212CCP9	A0A212CCP9	tr|A0A212CCP9|A0A212CCP9_CEREH Galectin OS=Cervus elaphus hippelaphus OX=46360 GN=Celaphus_00013819 PE=4 SV=1	1	5	5	5	36.7	15.968	113110000	805150000	634770000	423930000	831960000	811070000
A0A212CCR1	A0A212CCR1;A0A212CQK3	tr|A0A212CCR1|A0A212CCR1_CEREH PHB2 OS=Cervus elaphus hippelaphus OX=46360 GN=Celaphus_00013935 PE=4 SV=1	2	7	7	7	34.8	28.186		200270000	200590000	187220000	209780000	170530000
A0A212CCS5	A0A212CCS5	tr|A0A212CCS5|A0A212CCS5_CEREH Tubulin alpha chain OS=Cervus elaphus hippelaphus OX=46360 GN=Celaphus_00013825 PE=3 SV=1	1	6	1	1	17.2	45.302		9374500	11655000	7340600		6585200
A0A212CCS7	A0A212CCS7	tr|A0A212CCS7|A0A212CCS7_CEREH MYH9 OS=Cervus elaphus hippelaphus OX=46360 GN=Celaphus_00014129 PE=3 SV=1	1	2	2	2	16.6	22.574	23216000	23864000	30900000
A0A212CCW0	A0A212CCW0	tr|A0A212CCW0|A0A212CCW0_CEREH A2M OS=Cervus elaphus hippelaphus OX=46360 GN=Celaphus_00013977 PE=4 SV=1	1	7	3	3	59.1	15.518	26538000	58523000				54339000
A0A212CCW5	A0A212CCW5	tr|A0A212CCW5|A0A212CCW5_CEREH NDUFA9 (Fragment) OS=Cervus elaphus hippelaphus OX=46360 GN=Celaphus_00013890 PE=4 SV=1	1	1	1	1	3	49.354		14749000	14055000	12625000	16610000
A0A212CCX5	A0A212CCX5	tr|A0A212CCX5|A0A212CCX5_CEREH Uncharacterized protein OS=Cervus elaphus hippelaphus OX=46360 GN=Celaphus_00014154 PE=4 SV=1	1	3	3	3	16.7	22.981		204010000	374680000	32187000	77808000	62681000
A0A212CCX6	A0A212CCX6	tr|A0A212CCX6|A0A212CCX6_CEREH Uncharacterized protein OS=Cervus elaphus hippelaphus OX=46360 GN=Celaphus_00014155 PE=4 SV=1	1	2	2	2	24.3	16.09		73123000	79527000
A0A212CCY8	A0A212CCY8;A0A212CLP9	tr|A0A212CCY8|A0A212CCY8_CEREH Uncharacterized protein OS=Cervus elaphus hippelaphus OX=46360 GN=Celaphus_00014136 PE=4 SV=1	2	7	0	7	20.3	46.743	274930000	636680000	803980000	672190000	1033300000	1059200000
A0A212CCZ3	A0A212CCZ3	tr|A0A212CCZ3|A0A212CCZ3_CEREH TOMM22 (Fragment) OS=Cervus elaphus hippelaphus OX=46360 GN=Celaphus_00013796 PE=4 SV=1	1	1	1	1	8.8	13.839	17942000	14731000	17020000
A0A212CD10	A0A212CD10	tr|A0A212CD10|A0A212CD10_CEREH C1S OS=Cervus elaphus hippelaphus OX=46360 GN=Celaphus_00013938 PE=3 SV=1	1	3	3	3	8.7	57.389		6083900			14941000	9218800
A0A212CD20	A0A212CD20	tr|A0A212CD20|A0A212CD20_CEREH A2M (Fragment) OS=Cervus elaphus hippelaphus OX=46360 GN=Celaphus_00013976 PE=4 SV=1	1	30	13	13	47.2	81.18	957190000	926240000	928880000	751990000	619620000	713350000
A0A212CD21	A0A212CD21	tr|A0A212CD21|A0A212CD21_CEREH ATP6V1E1 OS=Cervus elaphus hippelaphus OX=46360 GN=Celaphus_00013832 PE=4 SV=1	1	2	2	2	16	14.993	27184000	33291000	33483000
A0A212CD23	A0A212CD23	tr|A0A212CD23|A0A212CD23_CEREH Aconitate hydratase, mitochondrial OS=Cervus elaphus hippelaphus OX=46360 GN=Celaphus_00013755 PE=3 SV=1	1	11	11	11	16.7	97.135	30467000	44169000	28511000	69712000	50442000	48362000
A0A212CD44	A0A212CD44;A0A212CLV5	tr|A0A212CD44|A0A212CD44_CEREH RPL3 (Fragment) OS=Cervus elaphus hippelaphus OX=46360 GN=Celaphus_00013784 PE=3 SV=1	2	4	1	4	11.6	52.562		18313000	35201000
A0A212CD52	A0A212CD52;A0A212DC06	tr|A0A212CD52|A0A212CD52_CEREH Uncharacterized protein (Fragment) OS=Cervus elaphus hippelaphus OX=46360 GN=Celaphus_00014132 PE=4 SV=1	2	28	24	28	31.3	120.34	714320000	589700000	584990000	104330000	175370000	188990000
A0A212CD55	A0A212CD55	tr|A0A212CD55|A0A212CD55_CEREH MYH9 OS=Cervus elaphus hippelaphus OX=46360 GN=Celaphus_00014127 PE=3 SV=1	1	5	4	5	39.8	19.093	79519000	66533000	71104000	25695000	32577000	22777000
A0A212CD71	A0A212CD71	tr|A0A212CD71|A0A212CD71_CEREH Triosephosphate isomerase OS=Cervus elaphus hippelaphus OX=46360 GN=Celaphus_00013928 PE=3 SV=1	1	11	11	11	57.4	29.18	363190000	481310000	624750000	553290000	538130000	663190000
A0A212CD85	A0A212CD85	tr|A0A212CD85|A0A212CD85_CEREH FBLN1 (Fragment) OS=Cervus elaphus hippelaphus OX=46360 GN=Celaphus_00013693 PE=4 SV=1	1	6	3	3	11.1	67.312				38692000	45249000	59899000
A0A212CD87	A0A212CD87	tr|A0A212CD87|A0A212CD87_CEREH RTCB (Fragment) OS=Cervus elaphus hippelaphus OX=46360 GN=Celaphus_00014161 PE=3 SV=1	1	2	2	2	4.4	65.434		16966000
A0A212CDA3	A0A212CDA3	tr|A0A212CDA3|A0A212CDA3_CEREH APOL3 OS=Cervus elaphus hippelaphus OX=46360 GN=Celaphus_00014143 PE=4 SV=1	1	1	1	1	3.3	32.235		70382000	71258000	70021000	58085000	64667000
A0A212CDC3	A0A212CDC3	tr|A0A212CDC3|A0A212CDC3_CEREH Inhibitor of growth protein OS=Cervus elaphus hippelaphus OX=46360 GN=Celaphus_00013916 PE=3 SV=1	1	1	1	1	5.2	28.459
A0A212CDD0	A0A212CDD0	tr|A0A212CDD0|A0A212CDD0_CEREH Sulfurtransferase OS=Cervus elaphus hippelaphus OX=46360 GN=Celaphus_00014117 PE=4 SV=1	1	2	2	2	9.4	33.176			23375000
A0A212CDD7	A0A212CDD7	tr|A0A212CDD7|A0A212CDD7_CEREH ST13 OS=Cervus elaphus hippelaphus OX=46360 GN=Celaphus_00013769 PE=4 SV=1	1	2	2	2	8.5	30.217	38006000	19623000	12395000	29468000		31503000
A0A212CDE1	A0A212CDE1	tr|A0A212CDE1|A0A212CDE1_CEREH Uncharacterized protein (Fragment) OS=Cervus elaphus hippelaphus OX=46360 GN=Celaphus_00013978 PE=4 SV=1	1	15	14	14	19.7	112.71	176350000	345600000	223330000	49699000	35254000	53632000
A0A212CDF2	A0A212CDF2	tr|A0A212CDF2|A0A212CDF2_CEREH MYH9 OS=Cervus elaphus hippelaphus OX=46360 GN=Celaphus_00014131 PE=3 SV=1	1	3	1	1	27	12.783		48972000	17340000
A0A212CDG3	A0A212CDG3	tr|A0A212CDG3|A0A212CDG3_CEREH NADH-cytochrome b5 reductase OS=Cervus elaphus hippelaphus OX=46360 GN=Celaphus_00013723 PE=3 SV=1	1	5	5	5	23.1	34.929	67268000	61226000	86019000			50266000
A0A212CDI0	A0A212CDI0	tr|A0A212CDI0|A0A212CDI0_CEREH Ubiquitinyl hydrolase 1 OS=Cervus elaphus hippelaphus OX=46360 GN=Celaphus_00013927 PE=3 SV=1	1	3	3	3	6.9	95.768					18341000
A0A212CDI8	A0A212CDI8	tr|A0A212CDI8|A0A212CDI8_CEREH Uncharacterized protein (Fragment) OS=Cervus elaphus hippelaphus OX=46360 GN=Celaphus_00013979 PE=4 SV=1	1	1	1	1	5.1	20.226		30874000	34404000	10981000	18007000
A0A212CDJ2	A0A212CDJ2	tr|A0A212CDJ2|A0A212CDJ2_CEREH NAGA (Fragment) OS=Cervus elaphus hippelaphus OX=46360 GN=Celaphus_00013735 PE=3 SV=1	1	3	3	3	7.7	56.423		52035000	34446000	48772000	51199000	77664000
A0A212CDM9	A0A212CDM9;A0A212D9W4	tr|A0A212CDM9|A0A212CDM9_CEREH Uncharacterized protein OS=Cervus elaphus hippelaphus OX=46360 GN=Celaphus_00016262 PE=4 SV=1;tr|A0A212D9W4|A0A212D9W4_CEREH Uncharacterized protein OS=Cervus elaphus hippelaphus OX=46360 GN=Celaphus_00000655 PE=4 SV=1	2	2	2	2	16.9	14.843	328760000	142670000	161990000	166140000
A0A212CDN0	A0A212CDN0;A0A212C9B8;A0A212DBK0;A0A212DCL0;A0A212CTX1	tr|A0A212CDN0|A0A212CDN0_CEREH CPNE3 OS=Cervus elaphus hippelaphus OX=46360 GN=Celaphus_00016453 PE=4 SV=1;tr|A0A212C9B8|A0A212C9B8_CEREH Uncharacterized protein OS=Cervus elaphus hippelaphus OX=46360 GN=Celaphus_00010331 PE=4 SV=1;tr|A0A212DBK0|A0A212DBK0	5	2	2	2	4.7	59.594		6921000
A0A212CDN7	A0A212CDN7	tr|A0A212CDN7|A0A212CDN7_CEREH Uncharacterized protein (Fragment) OS=Cervus elaphus hippelaphus OX=46360 GN=Celaphus_00016446 PE=4 SV=1	1	1	1	1	14.8	9.2195
A0A212CDP2	A0A212CDP2	tr|A0A212CDP2|A0A212CDP2_CEREH STRAP OS=Cervus elaphus hippelaphus OX=46360 GN=Celaphus_00014033 PE=4 SV=1	1	1	1	1	4.6	38.497			8765500
A0A212CDR6	A0A212CDR6;A0A212C3N2;A0A212CX04	tr|A0A212CDR6|A0A212CDR6_CEREH RPL7 OS=Cervus elaphus hippelaphus OX=46360 GN=Celaphus_00016310 PE=4 SV=1	3	5	5	5	32	20.503	63645000	138120000	207840000	123470000	131240000	102570000
A0A212CDR7	A0A212CDR7	tr|A0A212CDR7|A0A212CDR7_CEREH Syndecan OS=Cervus elaphus hippelaphus OX=46360 GN=Celaphus_00016422 PE=3 SV=1	1	2	2	2	10.7	22.52
A0A212CDR8	A0A212CDR8	tr|A0A212CDR8|A0A212CDR8_CEREH Uncharacterized protein OS=Cervus elaphus hippelaphus OX=46360 GN=Celaphus_00013748 PE=4 SV=1	1	1	1	1	16.4	8.0624	21664000
A0A212CDR9	A0A212CDR9	tr|A0A212CDR9|A0A212CDR9_CEREH Ribosome biogenesis protein BOP1 OS=Cervus elaphus hippelaphus OX=46360 GN=BOP1 PE=3 SV=1	1	1	1	1	2	79.633			13255000
A0A212CDT2	A0A212CDT2	tr|A0A212CDT2|A0A212CDT2_CEREH EEF1D OS=Cervus elaphus hippelaphus OX=46360 GN=Celaphus_00016134 PE=3 SV=1	1	3	3	3	8.8	44.819		54405000	46374000		70097000
A0A212CDU4	A0A212CDU4	tr|A0A212CDU4|A0A212CDU4_CEREH ATP6V1H OS=Cervus elaphus hippelaphus OX=46360 GN=Celaphus_00016249 PE=4 SV=1	1	2	2	2	10.1	44.339		19520000	18121000	28189000	14164000	12153000
A0A212CDV3	A0A212CDV3;A0A212CE27	tr|A0A212CDV3|A0A212CDV3_CEREH Uncharacterized protein OS=Cervus elaphus hippelaphus OX=46360 GN=Celaphus_00016118 PE=4 SV=1	2	27	27	27	11.4	345.91	113290000	219620000	231510000	145510000	26723000	149200000
A0A212CDV9	A0A212CDV9;A0A212CGP4	tr|A0A212CDV9|A0A212CDV9_CEREH Polyadenylate-binding protein OS=Cervus elaphus hippelaphus OX=46360 GN=Celaphus_00016402 PE=3 SV=1	2	3	3	3	8.8	60.587			12705000
A0A212CDW6	A0A212CDW6	tr|A0A212CDW6|A0A212CDW6_CEREH TPD52 OS=Cervus elaphus hippelaphus OX=46360 GN=Celaphus_00016332 PE=4 SV=1	1	2	2	2	9.4	29.533		7572500	13459000	9408600	10949000	13668000
A0A212CDX3	A0A212CDX3	tr|A0A212CDX3|A0A212CDX3_CEREH Uncharacterized protein OS=Cervus elaphus hippelaphus OX=46360 GN=Celaphus_00016078 PE=4 SV=1	1	2	2	2	15.3	20.676		51336000	35383000			24263000
A0A212CDX8	A0A212CDX8	tr|A0A212CDX8|A0A212CDX8_CEREH Uncharacterized protein OS=Cervus elaphus hippelaphus OX=46360 GN=Celaphus_00016074 PE=3 SV=1	1	3	3	3	22.2	28.024			21547000
A0A212CDZ9	A0A212CDZ9	tr|A0A212CDZ9|A0A212CDZ9_CEREH LYPLA1 OS=Cervus elaphus hippelaphus OX=46360 GN=Celaphus_00016252 PE=4 SV=1	1	1	1	1	8.4	17.91			8747400	10629000	13231000	9623200
A0A212CE19	A0A212CE19	tr|A0A212CE19|A0A212CE19_CEREH MATN2 OS=Cervus elaphus hippelaphus OX=46360 GN=Celaphus_00016417 PE=4 SV=1	1	1	1	1	3.6	46.286
A0A212CE28	A0A212CE28	tr|A0A212CE28|A0A212CE28_CEREH Uncharacterized protein OS=Cervus elaphus hippelaphus OX=46360 GN=Celaphus_00016408 PE=4 SV=1	1	2	2	2	14.6	11.77	46387000	25982000	24174000
A0A212CE59	A0A212CE59	tr|A0A212CE59|A0A212CE59_CEREH NDUFB9 OS=Cervus elaphus hippelaphus OX=46360 GN=Celaphus_00016210 PE=3 SV=1	1	2	2	2	12.3	21.791			6560700
A6YLM6	A6YLM6;A0A212CE72	sp|A6YLM6|FABP4_CEREL Fatty acid-binding protein, adipocyte OS=Cervus elaphus OX=9860 GN=FABP4 PE=2 SV=1;tr|A0A212CE72|A0A212CE72_CEREH FABP4 OS=Cervus elaphus hippelaphus OX=46360 GN=Celaphus_00016340 PE=3 SV=1	2	8	8	8	63.6	14.588	173380000	347990000	374560000	343740000	448690000	370610000
A0A212CE90	A0A212CE90	tr|A0A212CE90|A0A212CE90_CEREH Uncharacterized protein (Fragment) OS=Cervus elaphus hippelaphus OX=46360 GN=Celaphus_00016476 PE=4 SV=1	1	5	5	5	15.3	53.572		34825000	30523000	50599000	26602000	49551000
A0A212CE91	A0A212CE91	tr|A0A212CE91|A0A212CE91_CEREH CA3 OS=Cervus elaphus hippelaphus OX=46360 GN=Celaphus_00016458 PE=4 SV=1	1	13	13	13	55.4	33.182	299430000	310700000	276780000	551760000	772500000	490680000
A0A212CEE6	A0A212CEE6	tr|A0A212CEE6|A0A212CEE6_CEREH FABP5 OS=Cervus elaphus hippelaphus OX=46360 GN=Celaphus_00016338 PE=3 SV=1	1	7	7	7	64.2	11.778	79939000	151150000	206600000	32198000	43175000	21565000
A0A212CEH0	A0A212CEH0	tr|A0A212CEH0|A0A212CEH0_CEREH YWHAZ OS=Cervus elaphus hippelaphus OX=46360 GN=Celaphus_00016401 PE=3 SV=1	1	5	4	4	58.1	13.351	313100000	324810000	351360000	371190000	304100000	273900000
A0A212CEK8	A0A212CEK8;A0A212CFQ3	tr|A0A212CEK8|A0A212CEK8_CEREH Uncharacterized protein OS=Cervus elaphus hippelaphus OX=46360 GN=Celaphus_00016293 PE=4 SV=1;tr|A0A212CFQ3|A0A212CFQ3_CEREH NASP (Fragment) OS=Cervus elaphus hippelaphus OX=46360 GN=Celaphus_00002601 PE=4 SV=1	2	1	1	1	11.5	21.109		5194900	6622400	6224200	5497800
A0A212CEK9	A0A212CEK9	tr|A0A212CEK9|A0A212CEK9_CEREH SDR16C6 OS=Cervus elaphus hippelaphus OX=46360 GN=Celaphus_00016266 PE=4 SV=1	1	4	4	4	17.3	30.534	88081000	49268000	48589000
A0A212CEM5	A0A212CEM5	tr|A0A212CEM5|A0A212CEM5_CEREH UBE2V2 OS=Cervus elaphus hippelaphus OX=46360 GN=Celaphus_00016238 PE=3 SV=1	1	2	2	2	9.7	20.012	30738000		17316000		23424000
A0A212CES3	A0A212CES3	tr|A0A212CES3|A0A212CES3_CEREH Inositol-1-monophosphatase (Fragment) OS=Cervus elaphus hippelaphus OX=46360 GN=Celaphus_00016469 PE=3 SV=1	1	6	6	6	24.3	28.339	66056000	84019000	49285000	79640000	54105000	95428000
A0A212CEU4	A0A212CEU4	tr|A0A212CEU4|A0A212CEU4_CEREH C8B (Fragment) OS=Cervus elaphus hippelaphus OX=46360 GN=Celaphus_00002492 PE=4 SV=1	1	4	4	4	9.9	77.143	20676000	17989000	21228000	21778000	25009000	24858000
A0A212CEU6	A0A212CEU6	tr|A0A212CEU6|A0A212CEU6_CEREH Uncharacterized protein OS=Cervus elaphus hippelaphus OX=46360 GN=Celaphus_00016416 PE=3 SV=1	1	7	7	7	66.1	12.784	161680000	126260000	108360000	106650000	122670000	141790000
A0A212CEW6	A0A212CEW6	tr|A0A212CEW6|A0A212CEW6_CEREH Proteasome subunit beta OS=Cervus elaphus hippelaphus OX=46360 GN=Celaphus_00002028 PE=3 SV=1	1	6	6	6	32.6	29.027	63477000	46731000	49002000	48514000	51875000	38025000
A0A212CEX5	A0A212CEX5	tr|A0A212CEX5|A0A212CEX5_CEREH CAPZA1 (Fragment) OS=Cervus elaphus hippelaphus OX=46360 GN=Celaphus_00002179 PE=3 SV=1	1	7	6	7	45.4	31.391	198620000	161000000	149200000	167400000	136250000	121340000
A0A212CEZ8	A0A212CEZ8	tr|A0A212CEZ8|A0A212CEZ8_CEREH CTHRC1 (Fragment) OS=Cervus elaphus hippelaphus OX=46360 GN=Celaphus_00016387 PE=4 SV=1	1	3	3	3	14.3	21.303	33173000	43607000	47943000
A0A212CF41	A0A212CF41;A0A212C6H0	tr|A0A212CF41|A0A212CF41_CEREH Cytochrome b-c1 complex subunit 6 OS=Cervus elaphus hippelaphus OX=46360 GN=Celaphus_00002586 PE=3 SV=1;tr|A0A212C6H0|A0A212C6H0_CEREH PSTPIP2 OS=Cervus elaphus hippelaphus OX=46360 GN=Celaphus_00017758 PE=4 SV=1	2	2	2	2	31.9	10.658			21342000		6272000
A0A212CF44	A0A212CF44	tr|A0A212CF44|A0A212CF44_CEREH Uncharacterized protein OS=Cervus elaphus hippelaphus OX=46360 GN=Celaphus_00002134 PE=4 SV=1	1	2	2	2	15.3	12.203	28504000	38920000		32491000	33053000
A0A212CF55	A0A212CF55;A0A212D5D5	tr|A0A212CF55|A0A212CF55_CEREH Adenylyl cyclase-associated protein OS=Cervus elaphus hippelaphus OX=46360 GN=Celaphus_00002698 PE=3 SV=1	2	19	19	19	54.6	51.107	159230000	516350000	627360000	588610000	492440000	527010000
A0A212CF60	A0A212CF60	tr|A0A212CF60|A0A212CF60_CEREH UBQLN4 OS=Cervus elaphus hippelaphus OX=46360 GN=Celaphus_00001912 PE=4 SV=1	1	1	1	1	3.8	45.961		16489000	7917400
A0A212CF73	A0A212CF73	tr|A0A212CF73|A0A212CF73_CEREH GNG12 OS=Cervus elaphus hippelaphus OX=46360 GN=Celaphus_00002440 PE=4 SV=1	1	1	1	1	18.6	6.6716		14233000	9958700
A0A212CF98	A0A212CF98	tr|A0A212CF98|A0A212CF98_CEREH Histone H2A OS=Cervus elaphus hippelaphus OX=46360 GN=Celaphus_00002074 PE=3 SV=1	1	4	1	1	38	14.994		23751000	40802000	48105000	18129000	14712000
A0A212CFB1	A0A212CFB1	tr|A0A212CFB1|A0A212CFB1_CEREH Uncharacterized protein OS=Cervus elaphus hippelaphus OX=46360 GN=Celaphus_00002851 PE=4 SV=1	1	8	8	8	16.9	67.388	34976000	32350000	37517000	66362000	40706000	42469000
A0A212CFD5	A0A212CFD5	tr|A0A212CFD5|A0A212CFD5_CEREH PRDX1 OS=Cervus elaphus hippelaphus OX=46360 GN=Celaphus_00002663 PE=4 SV=1	1	1	1	1	5.3	16.543	9677400	90478000	45301000	50698000	58676000	56365000
A0A212CFD7	A0A212CFD7	tr|A0A212CFD7|A0A212CFD7_CEREH Uncharacterized protein OS=Cervus elaphus hippelaphus OX=46360 GN=Celaphus_00002694 PE=4 SV=1	1	2	2	2	4.5	57.172		13612000	16717000
A0A212CFH8	A0A212CFH8	tr|A0A212CFH8|A0A212CFH8_CEREH Protein S100 OS=Cervus elaphus hippelaphus OX=46360 GN=Celaphus_00001984 PE=3 SV=1	1	2	2	2	38.3	10.518	30859000	309840000	341280000	73155000	121150000	79556000
A0A212CFI6	A0A212CFI6	tr|A0A212CFI6|A0A212CFI6_CEREH Protein S100 OS=Cervus elaphus hippelaphus OX=46360 GN=Celaphus_00001990 PE=3 SV=1	1	4	4	4	36.6	11.776	120510000	76520000	130130000	134550000	112660000	128160000
A0A212CFK4	A0A212CFK4	tr|A0A212CFK4|A0A212CFK4_CEREH Glucosylceramidase OS=Cervus elaphus hippelaphus OX=46360 GN=Celaphus_00001930 PE=3 SV=1	1	1	1	1	2.9	61.845		2155800			5308000	9321600
A0A212CFL8	A0A212CFL8	tr|A0A212CFL8|A0A212CFL8_CEREH FAAH OS=Cervus elaphus hippelaphus OX=46360 GN=Celaphus_00002583 PE=4 SV=1	1	3	3	3	6	59.111	51909000	20750000	16446000	20797000	18457000	17893000
A0A212CFL9	A0A212CFL9	tr|A0A212CFL9|A0A212CFL9_CEREH S100A14 OS=Cervus elaphus hippelaphus OX=46360 GN=Celaphus_00001986 PE=3 SV=1	1	1	1	1	8.7	11.434	22368000
A0A212CFN2	A0A212CFN2	tr|A0A212CFN2|A0A212CFN2_CEREH NAD(P)H-hydrate epimerase OS=Cervus elaphus hippelaphus OX=46360 GN=APOA1BP PE=3 SV=1	1	2	2	2	10.4	31.389		19576000	15617000	13791000		22750000
A0A212CFR1	A0A212CFR1	tr|A0A212CFR1|A0A212CFR1_CEREH Transgelin OS=Cervus elaphus hippelaphus OX=46360 GN=Celaphus_00001829 PE=3 SV=1	1	12	12	12	71.4	22.425	444370000	385180000	394020000	328840000	307150000	280140000
A0A212CFT3	A0A212CFT3	tr|A0A212CFT3|A0A212CFT3_CEREH Uncharacterized protein OS=Cervus elaphus hippelaphus OX=46360 GN=Celaphus_00002108 PE=3 SV=1	1	4	4	4	24.7	24.756		76073000	68131000	53942000	47471000	84992000
A0A212CFT8	A0A212CFT8	tr|A0A212CFT8|A0A212CFT8_CEREH SCP2 (Fragment) OS=Cervus elaphus hippelaphus OX=46360 GN=Celaphus_00002534 PE=4 SV=1	1	3	3	3	13.3	15.236			21059000
A0A212CFW7	A0A212CFW7	tr|A0A212CFW7|A0A212CFW7_CEREH Cathepsin K OS=Cervus elaphus hippelaphus OX=46360 GN=Celaphus_00002051 PE=3 SV=1	1	4	4	4	17.6	37.153		31897000	29582000			28172000
A0A212CFX7	A0A212CFX7	tr|A0A212CFX7|A0A212CFX7_CEREH Uncharacterized protein (Fragment) OS=Cervus elaphus hippelaphus OX=46360 GN=Celaphus_00002442 PE=4 SV=1	1	1	1	1	2.9	60.416		16465000	20790000
A0A212CFY7	A0A212CFY7	tr|A0A212CFY7|A0A212CFY7_CEREH Glutathione peroxidase OS=Cervus elaphus hippelaphus OX=46360 GN=Celaphus_00002538 PE=3 SV=1	1	4	4	4	23.8	17.034	144970000	29761000	53580000	24352000	57350000	36732000
A0A212CFZ0	A0A212CFZ0	tr|A0A212CFZ0|A0A212CFZ0_CEREH SARS OS=Cervus elaphus hippelaphus OX=46360 GN=Celaphus_00002239 PE=4 SV=1	1	1	1	1	2.9	58.678		17161000				19255000
A0A212CFZ8	A0A212CFZ8;A0A212DFC4	tr|A0A212CFZ8|A0A212CFZ8_CEREH Uncharacterized protein OS=Cervus elaphus hippelaphus OX=46360 GN=Celaphus_00002203 PE=4 SV=1;tr|A0A212DFC4|A0A212DFC4_CEREH RAP1B OS=Cervus elaphus hippelaphus OX=46360 GN=Celaphus_00011617 PE=4 SV=1	2	2	2	2	12.5	20.987	6539600				152630000	147760000
A0A212CG07	A0A212CG07	tr|A0A212CG07|A0A212CG07_CEREH S100A12 OS=Cervus elaphus hippelaphus OX=46360 GN=Celaphus_00001998 PE=3 SV=1	1	4	4	4	65.4	9.1454	623460000	245000000	173950000	167310000	132140000	218040000
A0A212CG33	A0A212CG33	tr|A0A212CG33|A0A212CG33_CEREH GSTM1 OS=Cervus elaphus hippelaphus OX=46360 GN=Celaphus_00002226 PE=4 SV=1	1	5	1	1	16	29.634
A0A212CG34	A0A212CG34;A0A212CH76;A0A212CH54;A0A212DDH1;A0A212C4I6;A0A212DDE4	tr|A0A212CG34|A0A212CG34_CEREH Sodium/potassium-transporting ATPase subunit alpha OS=Cervus elaphus hippelaphus OX=46360 GN=Celaphus_00002139 PE=3 SV=1	6	9	9	9	11.9	109.43	44238000	23669000	88506000			34924000
A0A212CG46	A0A212CG46	tr|A0A212CG46|A0A212CG46_CEREH Uncharacterized protein (Fragment) OS=Cervus elaphus hippelaphus OX=46360 GN=Celaphus_00001846 PE=4 SV=1	1	3	3	3	29.4	18.823
A0A212CG63	A0A212CG63	tr|A0A212CG63|A0A212CG63_CEREH ATP5F1 OS=Cervus elaphus hippelaphus OX=46360 GN=Celaphus_00002198 PE=4 SV=1	1	7	7	7	30.1	28.709	31033000				28792000	28982000
A0A212CG71	A0A212CG71	tr|A0A212CG71|A0A212CG71_CEREH CMPK1 (Fragment) OS=Cervus elaphus hippelaphus OX=46360 GN=Celaphus_00002562 PE=3 SV=1	1	3	3	3	20.2	20.001		47508000	57323000	52856000	77395000	76833000
A0A212CG89	A0A212CG89	tr|A0A212CG89|A0A212CG89_CEREH C8A OS=Cervus elaphus hippelaphus OX=46360 GN=Celaphus_00002493 PE=4 SV=1	1	3	3	3	13	38.945		31702000	32561000	42966000	42865000	38727000
A0A212CGC3	A0A212CGC3	tr|A0A212CGC3|A0A212CGC3_CEREH PPT1 OS=Cervus elaphus hippelaphus OX=46360 GN=Celaphus_00002697 PE=4 SV=1	1	1	1	1	5.8	29.222			8346000
A0A212CGG5	A0A212CGG5	tr|A0A212CGG5|A0A212CGG5_CEREH Uncharacterized protein OS=Cervus elaphus hippelaphus OX=46360 GN=Celaphus_00001817 PE=4 SV=1	1	1	1	1	14.6	15.04					17952000	7266300
A0A212CGG9	A0A212CGG9	tr|A0A212CGG9|A0A212CGG9_CEREH PPP1R7 OS=Cervus elaphus hippelaphus OX=46360 GN=Celaphus_00002849 PE=4 SV=1	1	1	1	1	3.5	31.981			15109000
A0A212CGH4	A0A212CGH4	tr|A0A212CGH4|A0A212CGH4_CEREH Nucleolar GTP-binding protein 2 OS=Cervus elaphus hippelaphus OX=46360 GN=Celaphus_00002729 PE=3 SV=1	1	1	1	1	2.3	65.74
A0A212CGI7	A0A212CGI7	tr|A0A212CGI7|A0A212CGI7_CEREH OLFML3 OS=Cervus elaphus hippelaphus OX=46360 GN=Celaphus_00002158 PE=4 SV=1	1	3	3	3	14.2	28.227		38791000	25706000	26836000		39522000
A0A212CGK0	A0A212CGK0;A0A212CFP1;A0A212CG22	tr|A0A212CGK0|A0A212CGK0_CEREH GSTM1 OS=Cervus elaphus hippelaphus OX=46360 GN=Celaphus_00002224 PE=4 SV=1	3	14	10	14	56	51.746	2168400000	1066300000	1021200000	1709900000	1614900000	1925200000
A0A212CGK4	A0A212CGK4	tr|A0A212CGK4|A0A212CGK4_CEREH Uncharacterized protein OS=Cervus elaphus hippelaphus OX=46360 GN=Celaphus_00002766 PE=4 SV=1	1	3	3	3	10.2	48.86		20929000	20516000		20949000
A0A212CGL8	A0A212CGL8	tr|A0A212CGL8|A0A212CGL8_CEREH PFDN2 OS=Cervus elaphus hippelaphus OX=46360 GN=Celaphus_00001793 PE=4 SV=1	1	2	2	2	16.9	16.648		12516000				14445000
A0A212CGM4	A0A212CGM4;A0A212DAS9;A0A212CCH0	tr|A0A212CGM4|A0A212CGM4_CEREH YBX1 OS=Cervus elaphus hippelaphus OX=46360 GN=Celaphus_00002669 PE=4 SV=1	3	4	4	4	21.1	30.495	100560000	82135000
A0A212CGM8	A0A212CGM8	tr|A0A212CGM8|A0A212CGM8_CEREH Coatomer subunit alpha OS=Cervus elaphus hippelaphus OX=46360 GN=Celaphus_00001814 PE=4 SV=1	1	6	6	6	6.3	133.14	10316000		16559000		13305000
A0A212CGN9	A0A212CGN9	tr|A0A212CGN9|A0A212CGN9_CEREH Protein S100 OS=Cervus elaphus hippelaphus OX=46360 GN=Celaphus_00001992 PE=3 SV=1	1	10	10	10	59.4	11.477	6326600000	3748800000	4370400000	2661000000	2541000000	2779800000
A0A212CGQ3	A0A212CGQ3	tr|A0A212CGQ3|A0A212CGQ3_CEREH Uncharacterized protein (Fragment) OS=Cervus elaphus hippelaphus OX=46360 GN=Celaphus_00002496 PE=4 SV=1	1	1	1	1	4	28.248	68915000	77822000	80827000	26287000	45039000	34749000
A0A212CGR6	A0A212CGR6	tr|A0A212CGR6|A0A212CGR6_CEREH MYCBP (Fragment) OS=Cervus elaphus hippelaphus OX=46360 GN=Celaphus_00002714 PE=4 SV=1	1	2	2	2	25.5	16.55		9827000	17969000
A0A212CGS9	A0A212CGS9	tr|A0A212CGS9|A0A212CGS9_CEREH SELENBP1 OS=Cervus elaphus hippelaphus OX=46360 GN=Celaphus_00002029 PE=4 SV=1	1	6	6	6	19.9	47.402	12716000	20350000	51531000	93890000	125250000	73101000
A0A212CGW8	A0A212CGW8	tr|A0A212CGW8|A0A212CGW8_CEREH RPS27 OS=Cervus elaphus hippelaphus OX=46360 GN=Celaphus_00001968 PE=4 SV=1	1	1	1	1	10.7	11.952	26969000
A0A212CGX3	A0A212CGX3	tr|A0A212CGX3|A0A212CGX3_CEREH PSMD4 OS=Cervus elaphus hippelaphus OX=46360 GN=Celaphus_00002033 PE=4 SV=1	1	1	1	1	4	40.784
A0A212CGY9	A0A212CGY9	tr|A0A212CGY9|A0A212CGY9_CEREH LMNA (Fragment) OS=Cervus elaphus hippelaphus OX=46360 GN=Celaphus_00001909 PE=3 SV=1	1	27	26	27	48.4	60.003	1625900000	1250300000	1324500000	916880000	990160000	1065600000
A0A212CGZ9	A0A212CGZ9	tr|A0A212CGZ9|A0A212CGZ9_CEREH Proteasome subunit alpha type OS=Cervus elaphus hippelaphus OX=46360 GN=Celaphus_00002234 PE=3 SV=1	1	9	9	9	45.1	25.883	102550000	130090000	117940000	131370000	110680000	128280000
A0A212CH16	A0A212CH16	tr|A0A212CH16|A0A212CH16_CEREH TPM3 OS=Cervus elaphus hippelaphus OX=46360 GN=Celaphus_00001965 PE=3 SV=1	1	10	3	3	28.9	32.888	56696000	202500000	233620000	125720000	117710000	93644000
A0A212CH24	A0A212CH24	tr|A0A212CH24|A0A212CH24_CEREH ALDH9A1 OS=Cervus elaphus hippelaphus OX=46360 GN=Celaphus_00001741 PE=3 SV=1	1	3	3	3	9.7	34.308		11599000			36978000
A0A212CH34	A0A212CH34;A0A212CWZ7	tr|A0A212CH34|A0A212CH34_CEREH RPL5 OS=Cervus elaphus hippelaphus OX=46360 GN=Celaphus_00002320 PE=3 SV=1;tr|A0A212CWZ7|A0A212CWZ7_CEREH ROCK2 (Fragment) OS=Cervus elaphus hippelaphus OX=46360 GN=Celaphus_00005298 PE=4 SV=1	2	3	2	3	12.4	29.765		37583000	38978000
A0A212CH36	A0A212CH36	tr|A0A212CH36|A0A212CH36_CEREH PHGDH OS=Cervus elaphus hippelaphus OX=46360 GN=Celaphus_00002117 PE=4 SV=1	1	2	2	2	6.3	40.354		26252000	17876000			10366000
A0A212CH37	A0A212CH37	tr|A0A212CH37|A0A212CH37_CEREH S100A13 OS=Cervus elaphus hippelaphus OX=46360 GN=Celaphus_00001985 PE=3 SV=1	1	3	3	3	28.6	11.185
A0A212CH77	A0A212CH77	tr|A0A212CH77|A0A212CH77_CEREH S100A7 OS=Cervus elaphus hippelaphus OX=46360 GN=Celaphus_00001995 PE=4 SV=1	1	2	2	2	8.4	18.709		11392000	36251000		29955000	35095000
A0A212CH81	A0A212CH81	tr|A0A212CH81|A0A212CH81_CEREH SPTA1 (Fragment) OS=Cervus elaphus hippelaphus OX=46360 GN=Celaphus_00001845 PE=4 SV=1	1	11	11	11	9.9	168.68	66486000	119050000	53542000	21914000	26418000	31850000
A0A212CHB6	A0A212CHB6	tr|A0A212CHB6|A0A212CHB6_CEREH Uncharacterized protein OS=Cervus elaphus hippelaphus OX=46360 GN=Celaphus_00002806 PE=4 SV=1	1	82	82	82	48.8	262.33	5328100000	4965800000	5015400000	4941600000	4772800000	5138100000
A0A212CHC0	A0A212CHC0	tr|A0A212CHC0|A0A212CHC0_CEREH Protein S100 OS=Cervus elaphus hippelaphus OX=46360 GN=Celaphus_00001987 PE=3 SV=1	1	2	2	2	20.4	11.817		14352000
A0A212CHC1	A0A212CHC1	tr|A0A212CHC1|A0A212CHC1_CEREH Uncharacterized protein (Fragment) OS=Cervus elaphus hippelaphus OX=46360 GN=Celaphus_00002138 PE=4 SV=1	1	1	1	1	15.9	12.433
A0A212CHG3	A0A212CHG3	tr|A0A212CHG3|A0A212CHG3_CEREH S100A8 OS=Cervus elaphus hippelaphus OX=46360 GN=Celaphus_00001997 PE=3 SV=1	1	4	4	4	51.7	10.449	132800000	292680000	290730000	255900000	329930000	245900000
A0A212CHI1	A0A212CHI1	tr|A0A212CHI1|A0A212CHI1_CEREH SF3B4 OS=Cervus elaphus hippelaphus OX=46360 GN=Celaphus_00002071 PE=4 SV=1	1	1	1	1	5.4	44.371		11211000
A0A212CHM9	A0A212CHM9	tr|A0A212CHM9|A0A212CHM9_CEREH AKR1A1 OS=Cervus elaphus hippelaphus OX=46360 GN=Celaphus_00002602 PE=4 SV=1	1	12	12	12	47.7	36.556	89846000	35671000	45489000	44990000	54298000	61265000
A0A212CHQ2	A0A212CHQ2	tr|A0A212CHQ2|A0A212CHQ2_CEREH Protein S100 OS=Cervus elaphus hippelaphus OX=46360 GN=Celaphus_00001988 PE=3 SV=1	1	4	4	4	44.3	10.879	297790000	264930000	214170000	273440000	154780000	170870000
A0A212CHQ9	A0A212CHQ9	tr|A0A212CHQ9|A0A212CHQ9_CEREH P3H1 OS=Cervus elaphus hippelaphus OX=46360 GN=Celaphus_00002667 PE=4 SV=1	1	5	5	5	7.3	82.028		22684000			14584000
A0A212DBY9	A0A212DBY9;A0A212CHR4	tr|A0A212DBY9|A0A212DBY9_CEREH Uncharacterized protein OS=Cervus elaphus hippelaphus OX=46360 GN=Celaphus_00004843 PE=4 SV=1;tr|A0A212CHR4|A0A212CHR4_CEREH ILF2 OS=Cervus elaphus hippelaphus OX=46360 GN=Celaphus_00001981 PE=4 SV=1	2	1	1	1	11.2	13.837		12104000	14494000	13683000	16088000
A0A212CHT9	A0A212CHT9	tr|A0A212CHT9|A0A212CHT9_CEREH Glutathione S-transferase OS=Cervus elaphus hippelaphus OX=46360 GN=Celaphus_00002221 PE=3 SV=1	1	13	10	11	59.6	26.818		148210000	190720000	423250000	381210000	549360000
A0A212CHY1	A0A212CHY1	tr|A0A212CHY1|A0A212CHY1_CEREH PEX19 OS=Cervus elaphus hippelaphus OX=46360 GN=Celaphus_00001815 PE=4 SV=1	1	1	1	1	5	32.611
A0A212CHY4	A0A212CHY4	tr|A0A212CHY4|A0A212CHY4_CEREH CPN2 OS=Cervus elaphus hippelaphus OX=46360 GN=Celaphus_00012616 PE=4 SV=1	1	1	1	1	4	60.035		10846000			7820000
A0A212CHZ1	A0A212CHZ1	tr|A0A212CHZ1|A0A212CHZ1_CEREH COPB2 (Fragment) OS=Cervus elaphus hippelaphus OX=46360 GN=Celaphus_00012983 PE=4 SV=1	1	8	8	8	21	65.283		47221000	60499000	37149000		59034000
A0A212CI00	A0A212CI00	tr|A0A212CI00|A0A212CI00_CEREH PGM1 OS=Cervus elaphus hippelaphus OX=46360 GN=Celaphus_00002465 PE=4 SV=1	1	1	1	1	9.1	22.172		16210000	23521000	27108000	18836000	30268000
A0A212CI06	A0A212CI06	tr|A0A212CI06|A0A212CI06_CEREH 40S ribosomal protein S8 OS=Cervus elaphus hippelaphus OX=46360 GN=Celaphus_00002620 PE=3 SV=1	1	7	7	7	38.5	24.191		180890000	185680000	102410000	66226000	241860000
A0A212CI11	A0A212CI11;CON__P12763	tr|A0A212CI11|A0A212CI11_CEREH AHSG OS=Cervus elaphus hippelaphus OX=46360 GN=Celaphus_00012581 PE=3 SV=1	2	11	11	11	42.6	38.168	3609800000	3774500000	3134800000	2779700000	3261200000	3328700000
A0A212CI17	A0A212CI17;CON__ENSEMBL:ENSBTAP00000031360	tr|A0A212CI17|A0A212CI17_CEREH CD5L OS=Cervus elaphus hippelaphus OX=46360 GN=Celaphus_00001862 PE=4 SV=1	2	8	8	8	24.6	45.116	251910000	212060000	207120000	163750000	114720000	176240000
A0A212CI20	A0A212CI20	tr|A0A212CI20|A0A212CI20_CEREH CRYZ (Fragment) OS=Cervus elaphus hippelaphus OX=46360 GN=Celaphus_00002422 PE=4 SV=1	1	1	1	1	7.6	15.636	31672000		21354000
A0A212CI43	A0A212CI43	tr|A0A212CI43|A0A212CI43_CEREH Transcription factor BTF3 OS=Cervus elaphus hippelaphus OX=46360 GN=Celaphus_00002543 PE=3 SV=1	1	1	1	1	4.7	51.153	17896000	14130000	27008000			15037000
A0A212CI88	A0A212CI88	tr|A0A212CI88|A0A212CI88_CEREH Uncharacterized protein (Fragment) OS=Cervus elaphus hippelaphus OX=46360 GN=Celaphus_00012847 PE=4 SV=1	1	2	1	1	30.3	8.854
A0A212CI98	A0A212CI98	tr|A0A212CI98|A0A212CI98_CEREH Uncharacterized protein OS=Cervus elaphus hippelaphus OX=46360 GN=Celaphus_00012841 PE=4 SV=1	1	1	1	1	16.8	12.083
A0A212CIC4	A0A212CIC4;CON__Q58D62	tr|A0A212CIC4|A0A212CIC4_CEREH FETUB (Fragment) OS=Cervus elaphus hippelaphus OX=46360 GN=Celaphus_00012582 PE=4 SV=1	2	12	12	12	37	39.577	1920500000	1069800000	923280000	334690000	238170000	478350000
A0A212CIE0	A0A212CIE0	tr|A0A212CIE0|A0A212CIE0_CEREH ATP-dependent 6-phosphofructokinase OS=Cervus elaphus hippelaphus OX=46360 GN=Celaphus_00012864 PE=3 SV=1	1	4	4	4	5.9	96.516		17086000	17287000	20968000	16239000	22130000
A0A212CIE6	A0A212CIE6	tr|A0A212CIE6|A0A212CIE6_CEREH CSTB OS=Cervus elaphus hippelaphus OX=46360 GN=Celaphus_00012846 PE=4 SV=1	1	5	4	5	63.3	11.125	74742000	136480000	126430000	220930000	130820000	142130000
A0A212CIF3	A0A212CIF3	tr|A0A212CIF3|A0A212CIF3_CEREH PLS1 (Fragment) OS=Cervus elaphus hippelaphus OX=46360 GN=Celaphus_00013006 PE=4 SV=1	1	2	2	2	17.8	13.132				11724000	14112000	9824600
A0A212CIG4	A0A212CIG4	tr|A0A212CIG4|A0A212CIG4_CEREH DNA-directed RNA polymerases I, II, and III subunit RPABC3 OS=Cervus elaphus hippelaphus OX=46360 GN=Celaphus_00012559 PE=3 SV=1	1	1	1	1	8	17.143		14311000	15195000	16362000	9349000
A0A212CIG5	A0A212CIG5	tr|A0A212CIG5|A0A212CIG5_CEREH RAB5A (Fragment) OS=Cervus elaphus hippelaphus OX=46360 GN=Celaphus_00012917 PE=4 SV=1	1	3	2	2	23.1	17.801
A0A212CIM7	A0A212CIM7	tr|A0A212CIM7|A0A212CIM7_CEREH HRG OS=Cervus elaphus hippelaphus OX=46360 GN=Celaphus_00012584 PE=4 SV=1	1	7	7	7	18.9	46.608	309040000	213050000	263970000	219560000	246520000	215940000
A0A212CIN1	A0A212CIN1	tr|A0A212CIN1|A0A212CIN1_CEREH PLS1 (Fragment) OS=Cervus elaphus hippelaphus OX=46360 GN=Celaphus_00013005 PE=4 SV=1	1	3	3	3	21.2	18.595			22756000		28400000	27278000
A0A212CIN4	A0A212CIN4	tr|A0A212CIN4|A0A212CIN4_CEREH COL6A2 OS=Cervus elaphus hippelaphus OX=46360 GN=Celaphus_00012836 PE=4 SV=1	1	15	15	15	19.1	105.28	101310000	675290000	709270000	440060000	481600000	554850000
A0A212CIP3	A0A212CIP3	tr|A0A212CIP3|A0A212CIP3_CEREH TF OS=Cervus elaphus hippelaphus OX=46360 GN=Celaphus_00012935 PE=4 SV=1	1	26	14	26	58.1	58.414	20493000000	19323000000	16441000000	24249000000	21155000000	20556000000
A0A212CIR2	A0A212CIR2	tr|A0A212CIR2|A0A212CIR2_CEREH RPL35A (Fragment) OS=Cervus elaphus hippelaphus OX=46360 GN=Celaphus_00012665 PE=4 SV=1	1	3	3	3	32.4	8.1913	140320000	70415000	128360000	50583000	44492000	50407000
A0A212CIW6	A0A212CIW6	tr|A0A212CIW6|A0A212CIW6_CEREH RBP1 (Fragment) OS=Cervus elaphus hippelaphus OX=46360 GN=Celaphus_00012985 PE=3 SV=1	1	2	2	2	11.9	22.996	24832000	18920000		7572700		7625200
A0A212CIZ9	A0A212CIZ9	tr|A0A212CIZ9|A0A212CIZ9_CEREH Uncharacterized protein OS=Cervus elaphus hippelaphus OX=46360 GN=Celaphus_00012837 PE=4 SV=1	1	12	12	12	46.4	32.928	744040000	813930000	844820000	470800000	367090000	432480000
A0A212CJ19	A0A212CJ19	tr|A0A212CJ19|A0A212CJ19_CEREH CP (Fragment) OS=Cervus elaphus hippelaphus OX=46360 GN=Celaphus_00013026 PE=3 SV=1	1	22	11	22	30.7	107.47	357770000	327200000	400050000	396760000	428100000	391820000
A0A212CJ24	A0A212CJ24	tr|A0A212CJ24|A0A212CJ24_CEREH Uncharacterized protein OS=Cervus elaphus hippelaphus OX=46360 GN=Celaphus_00012943 PE=3 SV=1	1	1	1	1	6.7	28.464		13685000	15290000	9857500	9955500	9190200
A0A212CJ25	A0A212CJ25;CON__P01045-1;CON__Q2KJ62;CON__P01044-1	tr|A0A212CJ25|A0A212CJ25_CEREH Uncharacterized protein OS=Cervus elaphus hippelaphus OX=46360 GN=Celaphus_00012585 PE=4 SV=1	4	8	8	8	17.7	61.053	94367000	115030000	201110000	84242000	124170000	81143000
A0A212CJ52	A0A212CJ52;Q2Q1M5	tr|A0A212CJ52|A0A212CJ52_CEREH Apolipoprotein D OS=Cervus elaphus hippelaphus OX=46360 GN=Celaphus_00012628 PE=3 SV=1;tr|Q2Q1M5|Q2Q1M5_CEREL Apolipoprotein D OS=Cervus elaphus OX=9860 GN=APOD PE=2 SV=1	2	4	4	4	27.5	21.47	54434000	90654000	56100000	22055000
A0A212CJ59	A0A212CJ59	tr|A0A212CJ59|A0A212CJ59_CEREH Uncharacterized protein (Fragment) OS=Cervus elaphus hippelaphus OX=46360 GN=Celaphus_00012932 PE=4 SV=1	1	5	2	2	12.3	51.937	7279500					32464000
A0A212CJD3	A0A212CJD3	tr|A0A212CJD3|A0A212CJD3_CEREH PSMD2 (Fragment) OS=Cervus elaphus hippelaphus OX=46360 GN=Celaphus_00012555 PE=4 SV=1	1	3	3	3	7	74.79		4038800	5314800	5142100		5250300
A0A212CJF4	A0A212CJF4;CON__Q3Y5Z3	tr|A0A212CJF4|A0A212CJF4_CEREH Uncharacterized protein OS=Cervus elaphus hippelaphus OX=46360 GN=Celaphus_00012588 PE=4 SV=1	2	4	4	4	21.3	25.942	64432000	92812000	74722000	57017000	51798000	42475000
A0A212CJH4	A0A212CJH4	tr|A0A212CJH4|A0A212CJH4_CEREH COL6A2 OS=Cervus elaphus hippelaphus OX=46360 GN=Celaphus_00012835 PE=4 SV=1	1	9	9	9	57.3	18.815	424760000	272630000	333000000	220810000	226370000	251750000
A0A212CJH6	A0A212CJH6	tr|A0A212CJH6|A0A212CJH6_CEREH Uncharacterized protein OS=Cervus elaphus hippelaphus OX=46360 GN=Celaphus_00012933 PE=4 SV=1	1	4	1	1	28.1	21.805		11643000	15201000	15438000	13984000	11720000
A0A212CJL4	A0A212CJL4	tr|A0A212CJL4|A0A212CJL4_CEREH SNX4 OS=Cervus elaphus hippelaphus OX=46360 GN=Celaphus_00012668 PE=4 SV=1	1	1	1	1	2.4	44.285
A0A212CJQ0	A0A212CJQ0	tr|A0A212CJQ0|A0A212CJQ0_CEREH Uncharacterized protein OS=Cervus elaphus hippelaphus OX=46360 GN=Celaphus_00012549 PE=3 SV=1	1	1	1	1	3.5	49.403
A0A212CJQ4	A0A212CJQ4	tr|A0A212CJQ4|A0A212CJQ4_CEREH CAPZA2 (Fragment) OS=Cervus elaphus hippelaphus OX=46360 GN=Celaphus_00012021 PE=3 SV=1	1	3	2	2	15.8	31.434		39308000	39051000	43637000	40880000	35616000
A0A212CJS2	A0A212CJS2	tr|A0A212CJS2|A0A212CJS2_CEREH Uncharacterized protein (Fragment) OS=Cervus elaphus hippelaphus OX=46360 GN=Celaphus_00012785 PE=4 SV=1	1	2	2	2	2.8	162.46		6839200	7713500	19482000	12578000	14934000
A0A212CJT1	A0A212CJT1	tr|A0A212CJT1|A0A212CJT1_CEREH COL1A2 OS=Cervus elaphus hippelaphus OX=46360 GN=Celaphus_00011872 PE=4 SV=1	1	18	18	18	20.6	125.52	62975000000	32572000000	33954000000	66270000000	69777000000	67529000000
A0A212CJU2	A0A212CJU2	tr|A0A212CJU2|A0A212CJU2_CEREH SCIN OS=Cervus elaphus hippelaphus OX=46360 GN=Celaphus_00011900 PE=4 SV=1	1	1	1	1	9	24.987			18091000
A0A212CJX7	A0A212CJX7	tr|A0A212CJX7|A0A212CJX7_CEREH DNAJB11 OS=Cervus elaphus hippelaphus OX=46360 GN=Celaphus_00012580 PE=4 SV=1	1	1	1	1	4.5	40.503
A0A212CJY2	A0A212CJY2	tr|A0A212CJY2|A0A212CJY2_CEREH PTX3 OS=Cervus elaphus hippelaphus OX=46360 GN=Celaphus_00013069 PE=4 SV=1	1	12	12	12	35.9	42.04	356130000	437600000	327710000	299670000	355460000	362720000
A0A212CK07	A0A212CK07	tr|A0A212CK07|A0A212CK07_CEREH UBN2 OS=Cervus elaphus hippelaphus OX=46360 GN=Celaphus_00012295 PE=4 SV=1	1	2	2	2	1.8	152.42	34239000	143720000	103730000	99086000	263040000	183390000
A0A212CK12	A0A212CK12	tr|A0A212CK12|A0A212CK12_CEREH CALU OS=Cervus elaphus hippelaphus OX=46360 GN=Celaphus_00012231 PE=4 SV=1	1	9	9	9	26.8	49.36		219630000	252920000	41929000	17120000
A0A212CK22	A0A212CK22	tr|A0A212CK22|A0A212CK22_CEREH Uncharacterized protein OS=Cervus elaphus hippelaphus OX=46360 GN=Celaphus_00012786 PE=4 SV=1	1	1	1	1	2.7	55.701						9581400
A0A212CK37	A0A212CK37;REV__A0A212DEN0	tr|A0A212CK37|A0A212CK37_CEREH CALD1 OS=Cervus elaphus hippelaphus OX=46360 GN=Celaphus_00012269 PE=4 SV=1	2	12	12	12	22.1	59.958	246830000	144160000	151920000		85283000	54434000
A0A212CK41	A0A212CK41	tr|A0A212CK41|A0A212CK41_CEREH Uncharacterized protein OS=Cervus elaphus hippelaphus OX=46360 GN=Celaphus_00012946 PE=4 SV=1	1	1	1	1	9.4	18.944	37883000	34323000	22854000	24387000	30882000	30346000
A0A212CK62	A0A212CK62	tr|A0A212CK62|A0A212CK62_CEREH Proteasome endopeptidase complex (Fragment) OS=Cervus elaphus hippelaphus OX=46360 GN=Celaphus_00012165 PE=3 SV=1	1	3	2	3	37.8	16.815		53903000	47548000	47003000	56507000	64958000
A0A212CK64	A0A212CK64	tr|A0A212CK64|A0A212CK64_CEREH Peptidylprolyl isomerase OS=Cervus elaphus hippelaphus OX=46360 GN=Celaphus_00012062 PE=4 SV=1	1	1	1	1	16.2	15.608				5777400
A0A212CK65	A0A212CK65	tr|A0A212CK65|A0A212CK65_CEREH AKR1B1 OS=Cervus elaphus hippelaphus OX=46360 GN=Celaphus_00012266 PE=4 SV=1	1	3	3	3	14.8	31.684		20127000
A0A212CK87	A0A212CK87	tr|A0A212CK87|A0A212CK87_CEREH Uncharacterized protein OS=Cervus elaphus hippelaphus OX=46360 GN=Celaphus_00011876 PE=4 SV=1	1	2	2	2	7.3	34.864
A0A212CK95	A0A212CK95	tr|A0A212CK95|A0A212CK95_CEREH SSBP1 OS=Cervus elaphus hippelaphus OX=46360 GN=Celaphus_00012320 PE=3 SV=1	1	2	2	2	22.3	17.193		7285500
A0A212CK98	A0A212CK98	tr|A0A212CK98|A0A212CK98_CEREH H2AFV (Fragment) OS=Cervus elaphus hippelaphus OX=46360 GN=Celaphus_00012145 PE=4 SV=1	1	1	1	1	8.3	13.478	142360000	217770000	188370000	161000000	293300000	250960000
A0A212CKA1	A0A212CKA1;A0A212DGD6;A0A212CHP7	tr|A0A212CKA1|A0A212CKA1_CEREH Peptidyl-prolyl cis-trans isomerase OS=Cervus elaphus hippelaphus OX=46360 GN=Celaphus_00012146 PE=3 SV=1	3	7	7	7	57.9	17.869	911910000	1289500000	1307300000	1092200000	1142000000	1347500000
A0A212CKF9	A0A212CKF9	tr|A0A212CKF9|A0A212CKF9_CEREH Caveolin OS=Cervus elaphus hippelaphus OX=46360 GN=Celaphus_00012019 PE=3 SV=1	1	2	2	2	27.7	15.2			24639000
A0A212CKI1	A0A212CKI1	tr|A0A212CKI1|A0A212CKI1_CEREH PON1 (Fragment) OS=Cervus elaphus hippelaphus OX=46360 GN=Celaphus_00011875 PE=4 SV=1	1	3	3	3	19.2	22.13		90528000	119030000	54785000	70911000	67225000
A0A212CKI7	A0A212CKI7	tr|A0A212CKI7|A0A212CKI7_CEREH AQP1 OS=Cervus elaphus hippelaphus OX=46360 GN=Celaphus_00012071 PE=3 SV=1	1	1	1	1	4.4	16.814		12381000
A0A212CKI9	A0A212CKI9	tr|A0A212CKI9|A0A212CKI9_CEREH V-type proton ATPase subunit F OS=Cervus elaphus hippelaphus OX=46360 GN=Celaphus_00012235 PE=3 SV=1	1	4	4	4	51.3	13.398		25249000	19002000	11628000		16158000
A0A212CKK1	A0A212CKK1	tr|A0A212CKK1|A0A212CKK1_CEREH COPG2 (Fragment) OS=Cervus elaphus hippelaphus OX=46360 GN=Celaphus_00012260 PE=4 SV=1	1	2	2	2	6.8	48.857			16223000	8774900
A0A212CKQ2	A0A212CKQ2	tr|A0A212CKQ2|A0A212CKQ2_CEREH Peptidylprolyl isomerase (Fragment) OS=Cervus elaphus hippelaphus OX=46360 GN=Celaphus_00012063 PE=4 SV=1	1	4	4	4	17.7	33.335		46206000	89172000	74430000	58239000	55904000
A0A212CKS3	A0A212CKS3	tr|A0A212CKS3|A0A212CKS3_CEREH Uncharacterized protein (Fragment) OS=Cervus elaphus hippelaphus OX=46360 GN=Celaphus_00012326 PE=3 SV=1	1	1	1	1	0.9	122.95		20937000	12699000	14462000	12305000	12123000
A0A212CKS4	A0A212CKS4;A0A212D4C4;A0A212CH26;A0A212CMP9	tr|A0A212CKS4|A0A212CKS4_CEREH Uncharacterized protein OS=Cervus elaphus hippelaphus OX=46360 GN=Celaphus_00012107 PE=4 SV=1	4	10	10	10	39	29.923	391770000	750260000	614170000	417750000	513880000	483210000
A0A212CKV2	A0A212CKV2	tr|A0A212CKV2|A0A212CKV2_CEREH Uncharacterized protein OS=Cervus elaphus hippelaphus OX=46360 GN=Celaphus_00012158 PE=4 SV=1	1	8	8	8	8.8	136.69	181660000	55317000	65048000	65094000	45912000	65372000
A0A212CKV3	A0A212CKV3	tr|A0A212CKV3|A0A212CKV3_CEREH GARS (Fragment) OS=Cervus elaphus hippelaphus OX=46360 GN=Celaphus_00012079 PE=4 SV=1	1	1	1	1	5.5	43.216		8760600			4387000
A0A212CKW6	A0A212CKW6	tr|A0A212CKW6|A0A212CKW6_CEREH FLNC OS=Cervus elaphus hippelaphus OX=46360 GN=Celaphus_00012234 PE=4 SV=1	1	5	4	4	2.5	278.56		31867000	25538000	36054000	20734000	42097000
A0A212CKX9	A0A212CKX9	tr|A0A212CKX9|A0A212CKX9_CEREH Uncharacterized protein OS=Cervus elaphus hippelaphus OX=46360 GN=Celaphus_00012219 PE=3 SV=1	1	4	2	2	30	20.529	152620000	116640000	149390000	110240000	69533000	61158000
A0A212CKY6	A0A212CKY6	tr|A0A212CKY6|A0A212CKY6_CEREH PDIA4 OS=Cervus elaphus hippelaphus OX=46360 GN=Celaphus_00012437 PE=3 SV=1	1	13	13	13	27.6	61.358		183760000	56517000	38188000	20694000
A0A212CL29	A0A212CL29	tr|A0A212CL29|A0A212CL29_CEREH Uncharacterized protein OS=Cervus elaphus hippelaphus OX=46360 GN=Celaphus_00012189 PE=4 SV=1	1	2	1	1	9.7	28.864		24229000	16515000
A0A212CL93	A0A212CL93	tr|A0A212CL93|A0A212CL93_CEREH Uncharacterized protein OS=Cervus elaphus hippelaphus OX=46360 GN=Celaphus_00012149 PE=3 SV=1	1	3	2	2	17.1	24.969		16857000	18213000
A0A212CLA5	A0A212CLA5	tr|A0A212CLA5|A0A212CLA5_CEREH SEPT7 (Fragment) OS=Cervus elaphus hippelaphus OX=46360 GN=Celaphus_00012054 PE=3 SV=1	1	2	2	2	9.2	27.973	20739000	24557000	20254000	23044000	21689000	29599000
A0A212CLA9	A0A212CLA9	tr|A0A212CLA9|A0A212CLA9_CEREH YKT6 OS=Cervus elaphus hippelaphus OX=46360 GN=Celaphus_00012153 PE=3 SV=1	1	2	2	2	10.4	23.493
A0A212CLE9	A0A212CLE9	tr|A0A212CLE9|A0A212CLE9_CEREH DLD (Fragment) OS=Cervus elaphus hippelaphus OX=46360 GN=Celaphus_00012000 PE=4 SV=1	1	2	2	2	24.5	10.517
A0A212CLG8	A0A212CLG8	tr|A0A212CLG8|A0A212CLG8_CEREH Uncharacterized protein (Fragment) OS=Cervus elaphus hippelaphus OX=46360 GN=Celaphus_00018692 PE=4 SV=1	1	2	2	2	60.7	6.6233		38603000	29023000	29657000	32850000	34279000
A0A212CLH4	A0A212CLH4	tr|A0A212CLH4|A0A212CLH4_CEREH ADH5 OS=Cervus elaphus hippelaphus OX=46360 GN=Celaphus_00018601 PE=3 SV=1	1	2	2	2	14.3	35.083		23569000	35398000	41822000	50591000	39865000
A0A212CLJ7	A0A212CLJ7	tr|A0A212CLJ7|A0A212CLJ7_CEREH OSTC (Fragment) OS=Cervus elaphus hippelaphus OX=46360 GN=Celaphus_00018549 PE=4 SV=1	1	1	1	1	8.6	15.451	27917000	23113000	19514000	23698000
A0A212CLK7	A0A212CLK7	tr|A0A212CLK7|A0A212CLK7_CEREH NDUFA4 OS=Cervus elaphus hippelaphus OX=46360 GN=Celaphus_00011897 PE=4 SV=1	1	1	1	1	14.6	9.3246	121250000	100610000	99940000	54749000	92703000	66275000
A0A212CLQ4	A0A212CLQ4	tr|A0A212CLQ4|A0A212CLQ4_CEREH CAMK2D (Fragment) OS=Cervus elaphus hippelaphus OX=46360 GN=Celaphus_00018500 PE=4 SV=1	1	2	2	2	25.8	15.081		17733000	16562000	25287000	20233000	37670000
A0A212CLS6	A0A212CLS6	tr|A0A212CLS6|A0A212CLS6_CEREH LAP3 OS=Cervus elaphus hippelaphus OX=46360 GN=Celaphus_00018640 PE=4 SV=1	1	7	7	7	19.8	50.882		33937000	37145000	45713000	54048000	38017000
A0A212CLU1	A0A212CLU1	tr|A0A212CLU1|A0A212CLU1_CEREH PGM2 (Fragment) OS=Cervus elaphus hippelaphus OX=46360 GN=Celaphus_00018681 PE=3 SV=1	1	1	1	1	4.9	40.964		51891000	28535000	39973000	45949000	57803000
A0A212CLV1	A0A212CLV1	tr|A0A212CLV1|A0A212CLV1_CEREH HADH (Fragment) OS=Cervus elaphus hippelaphus OX=46360 GN=Celaphus_00018552 PE=4 SV=1	1	2	2	2	24.4	18.762	24635000	33623000	36394000			11975000
A0A212CLV3	A0A212CLV3	tr|A0A212CLV3|A0A212CLV3_CEREH Uncharacterized protein (Fragment) OS=Cervus elaphus hippelaphus OX=46360 GN=Celaphus_00018537 PE=4 SV=1	1	9	9	9	9.8	95.091	86198000	61264000	59778000	111760000	53372000	58532000
A0A212CLX0	A0A212CLX0;A0A212D0V9	tr|A0A212CLX0|A0A212CLX0_CEREH Uncharacterized protein OS=Cervus elaphus hippelaphus OX=46360 GN=Celaphus_00018577 PE=3 SV=1;tr|A0A212D0V9|A0A212D0V9_CEREH Uncharacterized protein OS=Cervus elaphus hippelaphus OX=46360 GN=Celaphus_00003652 PE=3 SV=1	2	1	1	1	13.3	9.585			29654000
A0A212CLX2	A0A212CLX2;CON__Q32PI4	tr|A0A212CLX2|A0A212CLX2_CEREH CFI (Fragment) OS=Cervus elaphus hippelaphus OX=46360 GN=Celaphus_00018518 PE=4 SV=1	2	6	6	6	20	45.857		29246000	54744000	44277000	29428000	50156000
A0A212CLX8	A0A212CLX8	tr|A0A212CLX8|A0A212CLX8_CEREH CASP6 OS=Cervus elaphus hippelaphus OX=46360 GN=Celaphus_00018544 PE=3 SV=1	1	3	3	3	13.9	40.848		43349000		22420000
A0A212CM12	A0A212CM12	tr|A0A212CM12|A0A212CM12_CEREH Uncharacterized protein OS=Cervus elaphus hippelaphus OX=46360 GN=Celaphus_00018531 PE=3 SV=1	1	4	4	4	37.9	11.271	310420000	412370000	471080000	399240000	329530000	253970000
A0A212CM16	A0A212CM16	tr|A0A212CM16|A0A212CM16_CEREH Annexin (Fragment) OS=Cervus elaphus hippelaphus OX=46360 GN=Celaphus_00018477 PE=3 SV=1	1	6	6	6	58.1	11.999	364100000	623530000	609610000	624180000	642950000	665820000
A0A212CM31	A0A212CM31	tr|A0A212CM31|A0A212CM31_CEREH Uncharacterized protein (Fragment) OS=Cervus elaphus hippelaphus OX=46360 GN=Celaphus_00018564 PE=4 SV=1	1	2	2	2	26.1	12.451		10368000	5369600	13551000	14435000	14599000
A0A212CM44	A0A212CM44	tr|A0A212CM44|A0A212CM44_CEREH TNC (Fragment) OS=Cervus elaphus hippelaphus OX=46360 GN=Celaphus_00016893 PE=4 SV=1	1	9	9	9	40.9	31.015	565700000	680310000	646190000	613900000	708410000	715790000
A0A212CM52	A0A212CM52	tr|A0A212CM52|A0A212CM52_CEREH TXN (Fragment) OS=Cervus elaphus hippelaphus OX=46360 GN=Celaphus_00016942 PE=4 SV=1	1	5	5	5	44.3	10.882	260960000	258420000	278970000	257040000	235310000	611710000
A0A212CM59	A0A212CM59	tr|A0A212CM59|A0A212CM59_CEREH Uncharacterized protein OS=Cervus elaphus hippelaphus OX=46360 GN=Celaphus_00017129 PE=4 SV=1	1	1	1	1	9.5	18.325	11113000000	5571400000	3906600000	2279700000	3198000000	1077600000
A0A212CM74	A0A212CM74	tr|A0A212CM74|A0A212CM74_CEREH AIMP1 (Fragment) OS=Cervus elaphus hippelaphus OX=46360 GN=Celaphus_00018558 PE=4 SV=1	1	2	2	2	18.4	13.986	28329000
A0A212CM83	A0A212CM83	tr|A0A212CM83|A0A212CM83_CEREH OGN OS=Cervus elaphus hippelaphus OX=46360 GN=Celaphus_00017025 PE=4 SV=1	1	10	10	10	37.2	33.991	526880000	670630000	603220000	1727600000	1431300000	1729400000
A0A212CMB3	A0A212CMB3	tr|A0A212CMB3|A0A212CMB3_CEREH Uncharacterized protein (Fragment) OS=Cervus elaphus hippelaphus OX=46360 GN=Celaphus_00017128 PE=4 SV=1	1	12	12	12	44.8	48.205	26799000000	15726000000	18003000000	20408000000	19670000000	19929000000
A0A212CMB6	A0A212CMB6	tr|A0A212CMB6|A0A212CMB6_CEREH RPL9 (Fragment) OS=Cervus elaphus hippelaphus OX=46360 GN=Celaphus_00018695 PE=4 SV=1	1	1	1	1	25	8.7931			30744000	22271000		22265000
A0A212CMB9	A0A212CMB9	tr|A0A212CMB9|A0A212CMB9_CEREH DCTN3 OS=Cervus elaphus hippelaphus OX=46360 GN=Celaphus_00017078 PE=4 SV=1	1	1	1	1	8.6	21.131		7326600			6677900	7543000
A0A212CMD6	A0A212CMD6;A0A212CY06	tr|A0A212CMD6|A0A212CMD6_CEREH ATP6V1B2 OS=Cervus elaphus hippelaphus OX=46360 GN=Celaphus_00017170 PE=3 SV=1	2	9	9	9	24.9	56.576		84604000	90710000	71077000	81602000	82999000
A0A212CMJ8	A0A212CMJ8	tr|A0A212CMJ8|A0A212CMJ8_CEREH OMD OS=Cervus elaphus hippelaphus OX=46360 GN=Celaphus_00017024 PE=4 SV=1	1	1	1	1	4.8	19.524	100730000	84128000	99253000	187140000	256270000	120950000
A0A212CMK7	A0A212CMK7	tr|A0A212CMK7|A0A212CMK7_CEREH PSMD5 OS=Cervus elaphus hippelaphus OX=46360 GN=Celaphus_00016885 PE=4 SV=1	1	1	1	1	2.1	47.457			4319900
A0A212D4Z9	A0A212D4Z9;A0A212CML7	tr|A0A212D4Z9|A0A212D4Z9_CEREH V-type proton ATPase subunit G OS=Cervus elaphus hippelaphus OX=46360 GN=Celaphus_00014461 PE=3 SV=1;tr|A0A212CML7|A0A212CML7_CEREH V-type proton ATPase subunit G OS=Cervus elaphus hippelaphus OX=46360 GN=Celaphus_00016898 PE	2	1	1	1	12.7	13.565	39119000	29701000	36588000			20227000
A0A212CML8	A0A212CML8	tr|A0A212CML8|A0A212CML8_CEREH Uncharacterized protein OS=Cervus elaphus hippelaphus OX=46360 GN=Celaphus_00016923 PE=3 SV=1	1	2	2	2	8	31.674				24297000	39352000	36846000
A0A212CMM8	A0A212CMM8;A0A212D5S3	tr|A0A212CMM8|A0A212CMM8_CEREH Uncharacterized protein (Fragment) OS=Cervus elaphus hippelaphus OX=46360 GN=Celaphus_00017112 PE=4 SV=1	2	3	3	3	48.4	9.8151	78135000	50940000	59474000	93704000	79307000	91691000
A0A212CMQ7	A0A212CMQ7	tr|A0A212CMQ7|A0A212CMQ7_CEREH Asporin (Fragment) OS=Cervus elaphus hippelaphus OX=46360 GN=Celaphus_00017023 PE=3 SV=1	1	4	4	4	26.2	26.016	266270000	291800000	344510000	249050000	313870000	322860000
A0A212CMR4	A0A212CMR4	tr|A0A212CMR4|A0A212CMR4_CEREH RAB14 (Fragment) OS=Cervus elaphus hippelaphus OX=46360 GN=Celaphus_00016880 PE=4 SV=1	1	6	6	6	29.9	31.683	38295000	58652000	58497000	70170000	29060000	49965000
A0A212CMT9	A0A212CMT9	tr|A0A212CMT9|A0A212CMT9_CEREH Uncharacterized protein OS=Cervus elaphus hippelaphus OX=46360 GN=Celaphus_00017190 PE=4 SV=1	1	2	2	2	21.2	9.923		51320000	61724000	49432000	59586000	42497000
A0A212CMU7	A0A212CMU7	tr|A0A212CMU7|A0A212CMU7_CEREH DPYSL2 OS=Cervus elaphus hippelaphus OX=46360 GN=Celaphus_00017111 PE=4 SV=1	1	8	6	8	23.2	46.303	37339000	84837000	52277000	111150000	69790000	92198000
A0A212CMV3	A0A212CMV3	tr|A0A212CMV3|A0A212CMV3_CEREH GSN (Fragment) OS=Cervus elaphus hippelaphus OX=46360 GN=Celaphus_00016879 PE=4 SV=1	1	4	1	1	47.9	13.323		63376000	121220000	97751000	48442000	170330000
A0A212CMX1	A0A212CMX1	tr|A0A212CMX1|A0A212CMX1_CEREH PPP2R2A (Fragment) OS=Cervus elaphus hippelaphus OX=46360 GN=Celaphus_00017115 PE=4 SV=1	1	1	1	1	6.6	25.022					16594000	9868800
A0A212CMY9	A0A212CMY9	tr|A0A212CMY9|A0A212CMY9_CEREH Uncharacterized protein (Fragment) OS=Cervus elaphus hippelaphus OX=46360 GN=Celaphus_00017124 PE=4 SV=1	1	13	8	13	51.3	56.182	2546700000	3263800000	3656300000	3194600000	3571200000	3661800000
A0A212CN08	A0A212CN08	tr|A0A212CN08|A0A212CN08_CEREH PTGR1 (Fragment) OS=Cervus elaphus hippelaphus OX=46360 GN=Celaphus_00016933 PE=4 SV=1	1	1	1	1	11.5	21.692			11081000
A0A212CN14	A0A212CN14	tr|A0A212CN14|A0A212CN14_CEREH HNRNPK (Fragment) OS=Cervus elaphus hippelaphus OX=46360 GN=Celaphus_00017060 PE=4 SV=1	1	4	4	4	28	17.107	34785000	53925000	56944000		26030000
A0A212CN21	A0A212CN21	tr|A0A212CN21|A0A212CN21_CEREH XPNPEP1 OS=Cervus elaphus hippelaphus OX=46360 GN=Celaphus_00008676 PE=3 SV=1	1	1	1	1	2.6	68.112			8078900			15726000
A0A212CN42	A0A212CN42;CON__P00978	tr|A0A212CN42|A0A212CN42_CEREH AMBP OS=Cervus elaphus hippelaphus OX=46360 GN=Celaphus_00016906 PE=4 SV=1	2	8	8	8	22.4	39.303	361120000	319680000	291410000	390740000	407090000	378250000
A0A212CN46	A0A212CN46;A0A212CKL0	tr|A0A212CN46|A0A212CN46_CEREH 40S ribosomal protein S7 OS=Cervus elaphus hippelaphus OX=46360 GN=Celaphus_00016874 PE=3 SV=1	2	7	7	7	45.3	23.916	166770000	451300000	381480000	300790000	307640000	328560000
A0A212CN58	A0A212CN58	tr|A0A212CN58|A0A212CN58_CEREH Uncharacterized protein OS=Cervus elaphus hippelaphus OX=46360 GN=Celaphus_00016877 PE=4 SV=1	1	5	5	5	35.8	23.359	67431000	52798000	64822000	63184000	48942000	59285000
A0A212CN73	A0A212CN73	tr|A0A212CN73|A0A212CN73_CEREH OAT OS=Cervus elaphus hippelaphus OX=46360 GN=Celaphus_00008773 PE=3 SV=1	1	5	5	5	19.5	41.134		18245000	19861000	37743000	24448000	29775000
A0A212CNA7	A0A212CNA7	tr|A0A212CNA7|A0A212CNA7_CEREH IFIT5 OS=Cervus elaphus hippelaphus OX=46360 GN=Celaphus_00008459 PE=4 SV=1	1	1	1	1	3.3	55.857					6730600
A0A212CNB3	A0A212CNB3	tr|A0A212CNB3|A0A212CNB3_CEREH Delta-aminolevulinic acid dehydratase OS=Cervus elaphus hippelaphus OX=46360 GN=Celaphus_00016912 PE=3 SV=1	1	4	4	4	22.2	35.612		40384000	45777000	39499000	46753000	45968000
A0A212CNC6	A0A212CNC6;CON__Q3SZR3	tr|A0A212CNC6|A0A212CNC6_CEREH ORM1 OS=Cervus elaphus hippelaphus OX=46360 GN=Celaphus_00016902 PE=4 SV=1	2	12	12	12	50	23.283	155510000	947690000	907280000	2351800000	2315800000	2035300000
A0A212CND6	A0A212CND6	tr|A0A212CND6|A0A212CND6_CEREH ERP44 (Fragment) OS=Cervus elaphus hippelaphus OX=46360 GN=Celaphus_00017187 PE=4 SV=1	1	2	2	2	8.4	21.208		25276000
A0A212CNF1	A0A212CNF1	tr|A0A212CNF1|A0A212CNF1_CEREH 40S ribosomal protein S24 OS=Cervus elaphus hippelaphus OX=46360 GN=Celaphus_00008329 PE=3 SV=1	1	2	2	2	19.8	15.168	45549000	80064000	209810000	64605000	67425000	64668000
A0A212CNF4	A0A212CNF4	tr|A0A212CNF4|A0A212CNF4_CEREH TNC (Fragment) OS=Cervus elaphus hippelaphus OX=46360 GN=Celaphus_00016894 PE=4 SV=1	1	26	26	26	28.8	139.15	1421400000	946410000	1023900000	1068200000	981080000	952970000
A0A212CNM0	A0A212CNM0	tr|A0A212CNM0|A0A212CNM0_CEREH Uncharacterized protein (Fragment) OS=Cervus elaphus hippelaphus OX=46360 GN=Celaphus_00008316 PE=4 SV=1	1	1	1	1	8.9	12.957
A0A212CNM9	A0A212CNM9	tr|A0A212CNM9|A0A212CNM9_CEREH FAM213A OS=Cervus elaphus hippelaphus OX=46360 GN=Celaphus_00008347 PE=4 SV=1	1	3	3	3	15.7	25.627	34124000	17304000	22693000		15661000	16560000
A0A212CNQ0	A0A212CNQ0;A0A212CXU1	tr|A0A212CNQ0|A0A212CNQ0_CEREH PRDX3 OS=Cervus elaphus hippelaphus OX=46360 GN=Celaphus_00008734 PE=4 SV=1	2	5	5	5	13.1	42.89	88892000	69675000	67644000	62045000	73312000	87312000
A0A212CNR3	A0A212CNR3	tr|A0A212CNR3|A0A212CNR3_CEREH GLUD1 OS=Cervus elaphus hippelaphus OX=46360 GN=Celaphus_00008370 PE=3 SV=1	1	5	5	5	10.9	61.663		38940000	54592000	60397000	52063000	50256000
A0A212CNV8	A0A212CNV8	tr|A0A212CNV8|A0A212CNV8_CEREH ACTN2 (Fragment) OS=Cervus elaphus hippelaphus OX=46360 GN=Celaphus_00008161 PE=4 SV=1	1	4	1	2	14.9	33.784				48421000	23634000	34129000
A0A212CNW7	A0A212CNW7	tr|A0A212CNW7|A0A212CNW7_CEREH VPS26A OS=Cervus elaphus hippelaphus OX=46360 GN=Celaphus_00008230 PE=4 SV=1	1	2	2	2	7.6	38.155	6170600
A0A212CNY4	A0A212CNY4	tr|A0A212CNY4|A0A212CNY4_CEREH COL17A1 OS=Cervus elaphus hippelaphus OX=46360 GN=Celaphus_00008654 PE=4 SV=1	1	1	1	1	0.6	137.26		22044000	23699000
A0A212CP05	A0A212CP05	tr|A0A212CP05|A0A212CP05_CEREH Uncharacterized protein OS=Cervus elaphus hippelaphus OX=46360 GN=Celaphus_00008240 PE=3 SV=1	1	2	1	2	8	35.274			20272000
A0A212CP07	A0A212CP07	tr|A0A212CP07|A0A212CP07_CEREH Transmembrane 9 superfamily member OS=Cervus elaphus hippelaphus OX=46360 GN=Celaphus_00008542 PE=3 SV=1	1	1	1	1	2.2	53.396		12140000	17065000
A0A212CP34	A0A212CP34	tr|A0A212CP34|A0A212CP34_CEREH VDAC2 (Fragment) OS=Cervus elaphus hippelaphus OX=46360 GN=Celaphus_00008312 PE=4 SV=1	1	5	5	5	14.2	38.582	85400000	95778000	122810000	26912000	36722000	34421000
A0A212CP36	A0A212CP36	tr|A0A212CP36|A0A212CP36_CEREH TSNAX (Fragment) OS=Cervus elaphus hippelaphus OX=46360 GN=Celaphus_00008112 PE=4 SV=1	1	1	1	1	13	16.325		3135400
A0A212CP48	A0A212CP48	tr|A0A212CP48|A0A212CP48_CEREH GOT1 OS=Cervus elaphus hippelaphus OX=46360 GN=Celaphus_00008571 PE=4 SV=1	1	1	1	1	4.9	29.641	38500000				22162000	18251000
A0A212CP58	A0A212CP58;A0A212CPE8	tr|A0A212CP58|A0A212CP58_CEREH GSTO1 (Fragment) OS=Cervus elaphus hippelaphus OX=46360 GN=Celaphus_00008658 PE=4 SV=1;tr|A0A212CPE8|A0A212CPE8_CEREH GSTO1 OS=Cervus elaphus hippelaphus OX=46360 GN=Celaphus_00008657 PE=4 SV=1	2	2	2	2	15.9	16.078		22849000			25146000
A0A212CP82	A0A212CP82	tr|A0A212CP82|A0A212CP82_CEREH HK1 (Fragment) OS=Cervus elaphus hippelaphus OX=46360 GN=Celaphus_00008235 PE=3 SV=1	1	1	1	1	2.3	72.708		3806900	2628900
A0A212CP93	A0A212CP93	tr|A0A212CP93|A0A212CP93_CEREH ECHS1 (Fragment) OS=Cervus elaphus hippelaphus OX=46360 GN=Celaphus_00008664 PE=3 SV=1	1	2	2	2	14.3	28.394		26109000	35199000	20644000	33218000	19682000
A0A212CP99	A0A212CP99	tr|A0A212CP99|A0A212CP99_CEREH VCL OS=Cervus elaphus hippelaphus OX=46360 GN=Celaphus_00008304 PE=4 SV=1	1	20	20	20	25.7	108.23	179870000	275100000	174270000	213220000	155430000	134780000
A0A212CPB8	A0A212CPB8	tr|A0A212CPB8|A0A212CPB8_CEREH GLRX3 OS=Cervus elaphus hippelaphus OX=46360 GN=Celaphus_00008798 PE=4 SV=1	1	1	1	1	4	37.393					15275000
A0A212CPH0	A0A212CPH0	tr|A0A212CPH0|A0A212CPH0_CEREH HNRNPH3 OS=Cervus elaphus hippelaphus OX=46360 GN=Celaphus_00008218 PE=4 SV=1	1	2	2	2	7.5	36.926		18029000	14817000		10997000	9235500
A0A212CPI9	A0A212CPI9	tr|A0A212CPI9|A0A212CPI9_CEREH Annexin (Fragment) OS=Cervus elaphus hippelaphus OX=46360 GN=Celaphus_00008375 PE=3 SV=1	1	10	10	10	35.2	30.834	156950000	106280000	55300000	24022000		21082000
A0A212CPK9	A0A212CPK9;A0A212C9Z2	tr|A0A212CPK9|A0A212CPK9_CEREH Phosphoglycerate mutase OS=Cervus elaphus hippelaphus OX=46360 GN=Celaphus_00008550 PE=3 SV=1	2	11	11	11	58.3	28.822	526310000	425560000	415290000	498210000	558200000	508550000
A0A212CPL0	A0A212CPL0	tr|A0A212CPL0|A0A212CPL0_CEREH P4HA1 (Fragment) OS=Cervus elaphus hippelaphus OX=46360 GN=Celaphus_00008276 PE=4 SV=1	1	2	2	2	57.1	5.5692		69037000	51777000	69456000	60523000	173940000
A0A212CPN3	A0A212CPN3	tr|A0A212CPN3|A0A212CPN3_CEREH Uncharacterized protein (Fragment) OS=Cervus elaphus hippelaphus OX=46360 GN=Celaphus_00008632 PE=4 SV=1	1	1	1	1	7.7	22.622		17205000	22419000	23186000	17358000	17668000
A0A212CPZ2	A0A212CPZ2	tr|A0A212CPZ2|A0A212CPZ2_CEREH PPA1 OS=Cervus elaphus hippelaphus OX=46360 GN=Celaphus_00008244 PE=4 SV=1	1	2	2	2	9.1	19.977	22914000
A0A212CQ03	A0A212CQ03;A0A212D0J8	tr|A0A212CQ03|A0A212CQ03_CEREH SAR1A OS=Cervus elaphus hippelaphus OX=46360 GN=Celaphus_00008243 PE=3 SV=1	2	7	7	7	45.5	22.409	41451000	124600000	225840000	132370000	181260000	97741000
A0A212CQ10	A0A212CQ10	tr|A0A212CQ10|A0A212CQ10_CEREH CFH OS=Cervus elaphus hippelaphus OX=46360 GN=Celaphus_00010786 PE=4 SV=1	1	2	1	1	15.3	13.155		9930900
A0A212CQ43	A0A212CQ43	tr|A0A212CQ43|A0A212CQ43_CEREH PSAP OS=Cervus elaphus hippelaphus OX=46360 GN=Celaphus_00008265 PE=4 SV=1	1	6	6	6	13.7	57.862	41109000	142690000	195920000	265710000	226630000	118370000
A0A212D7Q2	A0A212D7Q2;A0A212CQ66	tr|A0A212D7Q2|A0A212D7Q2_CEREH VAMP2 OS=Cervus elaphus hippelaphus OX=46360 GN=Celaphus_00001001 PE=4 SV=1;tr|A0A212CQ66|A0A212CQ66_CEREH VAMP3 (Fragment) OS=Cervus elaphus hippelaphus OX=46360 GN=Celaphus_00010992 PE=4 SV=1	2	1	1	1	13.8	13.324		19940000
A0A212CQ79	A0A212CQ79	tr|A0A212CQ79|A0A212CQ79_CEREH OGDHL OS=Cervus elaphus hippelaphus OX=46360 GN=Celaphus_00008400 PE=4 SV=1	1	1	1	1	1.3	112.15		9348800
A0A212CQ82	A0A212CQ82	tr|A0A212CQ82|A0A212CQ82_CEREH Apolipoprotein D OS=Cervus elaphus hippelaphus OX=46360 GN=Celaphus_00008486 PE=3 SV=1	1	4	4	4	28.5	18.286	68808000	92034000	71530000	70022000	57675000	73250000
A0A212CQC9	A0A212CQC9;A0A212CQT5	tr|A0A212CQC9|A0A212CQC9_CEREH CFH (Fragment) OS=Cervus elaphus hippelaphus OX=46360 GN=Celaphus_00010787 PE=4 SV=1	2	9	1	2	19.1	68.223			17522000
A0A212CQE7	A0A212CQE7	tr|A0A212CQE7|A0A212CQE7_CEREH PGD OS=Cervus elaphus hippelaphus OX=46360 GN=Celaphus_00010966 PE=4 SV=1	1	11	11	11	36.2	46.866	39335000	92012000	87949000	87290000	100340000	87653000
A0A212CQF6	A0A212CQF6;A6YLM5;A0A212D927;A0A212CCY3;A0A212CQS6	tr|A0A212CQF6|A0A212CQF6_CEREH ENO1 OS=Cervus elaphus hippelaphus OX=46360 GN=Celaphus_00010984 PE=3 SV=1;tr|A6YLM5|A6YLM5_CEREL Enolase 1 alpha (Fragment) OS=Cervus elaphus OX=9860 GN=ENO1 PE=2 SV=1	5	16	16	16	41.9	54.72	1056800000	974290000	1049900000	1128400000	1200500000	1222300000
A0A212CQK4	A0A212CQK4;A0A212CG60	tr|A0A212CQK4|A0A212CQK4_CEREH EFHD2 OS=Cervus elaphus hippelaphus OX=46360 GN=Celaphus_00011098 PE=4 SV=1	2	3	3	3	24.3	23.959	56561000	55721000	49188000	33623000	112850000	33249000
A0A212CQN3	A0A212CQN3	tr|A0A212CQN3|A0A212CQN3_CEREH SERPINC1 OS=Cervus elaphus hippelaphus OX=46360 GN=Celaphus_00011133 PE=3 SV=1	1	21	12	21	53.3	49.119	1368800000	1742100000	1574600000	2021600000	2178900000	1953800000
A0A212CQS3	A0A212CQS3	tr|A0A212CQS3|A0A212CQS3_CEREH Uncharacterized protein OS=Cervus elaphus hippelaphus OX=46360 GN=Celaphus_00011140 PE=4 SV=1	1	9	9	9	17.5	109.1	155890000	156670000	174540000	71678000
A0A212CQU1	A0A212CQU1	tr|A0A212CQU1|A0A212CQU1_CEREH CAPN2 (Fragment) OS=Cervus elaphus hippelaphus OX=46360 GN=Celaphus_00010839 PE=3 SV=1	1	1	1	1	3.2	52.635
A0A212CQV1	A0A212CQV1;CON__ENSEMBL:ENSBTAP00000034412	tr|A0A212CQV1|A0A212CQV1_CEREH C4BPA OS=Cervus elaphus hippelaphus OX=46360 GN=Celaphus_00010776 PE=4 SV=1	2	5	5	5	27.7	22.008	81165000	68946000	73302000
A0A212CR36	A0A212CR36	tr|A0A212CR36|A0A212CR36_CEREH Uncharacterized protein (Fragment) OS=Cervus elaphus hippelaphus OX=46360 GN=Celaphus_00010775 PE=4 SV=1	1	2	1	1	22.1	9.8132	78713000	51423000	31350000
A0A212CR39	A0A212CR39	tr|A0A212CR39|A0A212CR39_CEREH PRDX6 OS=Cervus elaphus hippelaphus OX=46360 GN=Celaphus_00011126 PE=4 SV=1	1	12	12	12	57.6	25.067	493040000	444970000	453030000	579840000	547260000	586780000
A0A212CR70	A0A212CR70	tr|A0A212CR70|A0A212CR70_CEREH Signal recognition particle 9 kDa protein OS=Cervus elaphus hippelaphus OX=46360 GN=Celaphus_00010854 PE=3 SV=1	1	1	1	1	12.8	10.072
A0A212CR92	A0A212CR92	tr|A0A212CR92|A0A212CR92_CEREH FH OS=Cervus elaphus hippelaphus OX=46360 GN=Celaphus_00010892 PE=4 SV=1	1	1	1	1	5.7	23.331	19297000	13840000	9613000		11037000
A0A212CRB3	A0A212CRB3	tr|A0A212CRB3|A0A212CRB3_CEREH HNRNPU (Fragment) OS=Cervus elaphus hippelaphus OX=46360 GN=Celaphus_00010878 PE=4 SV=1	1	2	2	2	6	46.213		29100000	32116000			36909000
A0A212CRF8	A0A212CRF8	tr|A0A212CRF8|A0A212CRF8_CEREH FMOD OS=Cervus elaphus hippelaphus OX=46360 GN=Celaphus_00010710 PE=4 SV=1	1	6	6	6	21.5	41.363	824370000	526160000	616360000	717400000	597020000	623810000
A0A212CRI8	A0A212CRI8	tr|A0A212CRI8|A0A212CRI8_CEREH C4BPA OS=Cervus elaphus hippelaphus OX=46360 GN=Celaphus_00010774 PE=4 SV=1	1	3	2	2	42.7	8.3226		25364000	17259000
A0A212CRK0	A0A212CRK0	tr|A0A212CRK0|A0A212CRK0_CEREH Uncharacterized protein OS=Cervus elaphus hippelaphus OX=46360 GN=Celaphus_00010988 PE=4 SV=1	1	3	2	2	19.6	22.444	47734000	177230000	92384000	265140000	191270000	190400000
A0A212CRK2	A0A212CRK2	tr|A0A212CRK2|A0A212CRK2_CEREH Uncharacterized protein (Fragment) OS=Cervus elaphus hippelaphus OX=46360 GN=Celaphus_00011009 PE=4 SV=1	1	2	2	2	27	10.519	61924000	79228000	87517000			44781000
A0A212CRK5	A0A212CRK5	tr|A0A212CRK5|A0A212CRK5_CEREH ACBD3 OS=Cervus elaphus hippelaphus OX=46360 GN=Celaphus_00010862 PE=4 SV=1	1	1	1	1	2.6	40.247
A0A212CRS4	A0A212CRS4	tr|A0A212CRS4|A0A212CRS4_CEREH EPRS (Fragment) OS=Cervus elaphus hippelaphus OX=46360 GN=Celaphus_00010815 PE=4 SV=1	1	3	3	3	4.8	119.31		27490000	36892000	34163000	29094000	36388000
A0A212CRV5	A0A212CRV5	tr|A0A212CRV5|A0A212CRV5_CEREH CFH (Fragment) OS=Cervus elaphus hippelaphus OX=46360 GN=Celaphus_00010781 PE=4 SV=1	1	5	2	2	20.4	38.264		26868000	10703000
A0A212CRW2	A0A212CRW2	tr|A0A212CRW2|A0A212CRW2_CEREH CFL2 (Fragment) OS=Cervus elaphus hippelaphus OX=46360 GN=Celaphus_00015415 PE=3 SV=1	1	3	1	1	23	18.605
A0A212CRW4	A0A212CRW4	tr|A0A212CRW4|A0A212CRW4_CEREH SERPINA3-7 OS=Cervus elaphus hippelaphus OX=46360 GN=Celaphus_00015514 PE=3 SV=1	1	4	3	3	21	34.075		216440000	297440000	100730000	92009000	70683000
A0A212CRY4	A0A212CRY4	tr|A0A212CRY4|A0A212CRY4_CEREH Isocitrate dehydrogenase [NADP] OS=Cervus elaphus hippelaphus OX=46360 GN=Celaphus_00015215 PE=3 SV=1	1	8	7	8	20.1	50.71	67843000	151850000	156190000	164630000	176260000	131290000
A0A212CS45	A0A212CS45;A0A212D1Y6	tr|A0A212CS45|A0A212CS45_CEREH Uncharacterized protein OS=Cervus elaphus hippelaphus OX=46360 GN=Celaphus_00015197 PE=4 SV=1;tr|A0A212D1Y6|A0A212D1Y6_CEREH Uncharacterized protein (Fragment) OS=Cervus elaphus hippelaphus OX=46360 GN=Celaphus_00002929 PE=4	2	2	2	2	7	54.591		16398000	23615000	18258000	13599000	7900400
A0A212CS86	A0A212CS86	tr|A0A212CS86|A0A212CS86_CEREH CSPG4 OS=Cervus elaphus hippelaphus OX=46360 GN=Celaphus_00015339 PE=4 SV=1	1	3	3	3	5.4	92.993		10263000	9141200	8653500	9937500	10812000
A0A212CSA3	A0A212CSA3	tr|A0A212CSA3|A0A212CSA3_CEREH ACAN OS=Cervus elaphus hippelaphus OX=46360 GN=Celaphus_00015196 PE=4 SV=1	1	33	33	33	19	218	1130200000	1687500000	1259200000	436900000	424070000	470780000
A0A212CSA5	A0A212CSA5	tr|A0A212CSA5|A0A212CSA5_CEREH Aminopeptidase OS=Cervus elaphus hippelaphus OX=46360 GN=Celaphus_00015210 PE=3 SV=1	1	14	14	14	21.1	106.98	45102000	170010000	205440000	220440000	171120000	230640000
A0A212CSA9	A0A212CSA9	tr|A0A212CSA9|A0A212CSA9_CEREH WDR61 (Fragment) OS=Cervus elaphus hippelaphus OX=46360 GN=Celaphus_00015313 PE=4 SV=1	1	2	2	2	8.2	40.653		3537300
A0A212CSB5	A0A212CSB5	tr|A0A212CSB5|A0A212CSB5_CEREH Uncharacterized protein OS=Cervus elaphus hippelaphus OX=46360 GN=Celaphus_00015433 PE=4 SV=1	1	3	3	3	8.6	54.001		10567000			15618000
A0A212CSE0	A0A212CSE0	tr|A0A212CSE0|A0A212CSE0_CEREH Uncharacterized protein OS=Cervus elaphus hippelaphus OX=46360 GN=Celaphus_00015149 PE=3 SV=1	1	2	2	2	5.5	47.307		10013000	11953000	4626700	7369900	25981000
A0A212CSF5	A0A212CSF5	tr|A0A212CSF5|A0A212CSF5_CEREH Uncharacterized protein OS=Cervus elaphus hippelaphus OX=46360 GN=Celaphus_00015551 PE=4 SV=1	1	1	1	1	2.5	88.673		3793100
A0A212CSG3	A0A212CSG3	tr|A0A212CSG3|A0A212CSG3_CEREH Proteasome endopeptidase complex (Fragment) OS=Cervus elaphus hippelaphus OX=46360 GN=Celaphus_00015423 PE=3 SV=1	1	5	5	5	28.8	25.195	47631000	59774000	79093000	60368000	50282000	52652000
A0A212CSJ5	A0A212CSJ5	tr|A0A212CSJ5|A0A212CSJ5_CEREH ETFA OS=Cervus elaphus hippelaphus OX=46360 GN=Celaphus_00015328 PE=4 SV=1	1	5	5	5	23.7	34.689	57446000	37919000	29814000	25553000	31207000	21619000
A0A212CSM8	A0A212CSM8	tr|A0A212CSM8|A0A212CSM8_CEREH SERPINA3-8 (Fragment) OS=Cervus elaphus hippelaphus OX=46360 GN=Celaphus_00015516 PE=3 SV=1	1	7	6	6	71.3	12.586		92814000	133960000	151590000	154330000	138460000
A0A212CSP3	A0A212CSP3	tr|A0A212CSP3|A0A212CSP3_CEREH Proteasome endopeptidase complex (Fragment) OS=Cervus elaphus hippelaphus OX=46360 GN=Celaphus_00015319 PE=3 SV=1	1	2	2	2	18.1	18.891	47499000	46700000	50111000		83403000	60924000
A0A212CSP9	A0A212CSP9	tr|A0A212CSP9|A0A212CSP9_CEREH Uncharacterized protein OS=Cervus elaphus hippelaphus OX=46360 GN=Celaphus_00015315 PE=3 SV=1	1	10	10	10	50.8	21.782	754670000	867180000	804460000	1632100000	1311100000	1702500000
A0A212CST5	A0A212CST5;A0A212CBU8	tr|A0A212CST5|A0A212CST5_CEREH Uncharacterized protein (Fragment) OS=Cervus elaphus hippelaphus OX=46360 GN=Celaphus_00015434 PE=4 SV=1	2	3	3	3	14.1	31.14	42791000	30835000	27047000	33127000	27787000	32020000
A0A212CSU3	A0A212CSU3	tr|A0A212CSU3|A0A212CSU3_CEREH DYNC1H1 OS=Cervus elaphus hippelaphus OX=46360 GN=Celaphus_00015550 PE=4 SV=1	1	2	2	2	2.1	225.87			22740000
A0A212CSU9	A0A212CSU9	tr|A0A212CSU9|A0A212CSU9_CEREH SERPINA3-6 OS=Cervus elaphus hippelaphus OX=46360 GN=Celaphus_00015517 PE=3 SV=1	1	11	8	11	41.8	34.994	2560100000	3734600000	3278100000	5040500000	5025200000	5197000000
A0A212CSV2	A0A212CSV2	tr|A0A212CSV2|A0A212CSV2_CEREH SERPINA3-5 (Fragment) OS=Cervus elaphus hippelaphus OX=46360 GN=Celaphus_00015515 PE=3 SV=1	1	5	3	3	18.7	35.27	899100000	662300000	674330000
A0A212CSV5	A0A212CSV5	tr|A0A212CSV5|A0A212CSV5_CEREH SERPINA3-5 (Fragment) OS=Cervus elaphus hippelaphus OX=46360 GN=Celaphus_00015510 PE=3 SV=1	1	7	4	5	32.1	29.349	619330000	1170600000	1006500000	1190600000	1375700000	1163300000
A0A212CSY2	A0A212CSY2	tr|A0A212CSY2|A0A212CSY2_CEREH RPS17 OS=Cervus elaphus hippelaphus OX=46360 GN=Celaphus_00015243 PE=4 SV=1	1	2	2	2	38.3	9.1806	35125000	80361000	86028000			17546000
A0A212CSZ1	A0A212CSZ1;CON__Q9N2I2	tr|A0A212CSZ1|A0A212CSZ1_CEREH SERPINA5 OS=Cervus elaphus hippelaphus OX=46360 GN=Celaphus_00015509 PE=3 SV=1	2	8	8	8	27	45.197	172070000	92407000	105790000	98910000	85670000	83932000
A0A212CSZ5	A0A212CSZ5	tr|A0A212CSZ5|A0A212CSZ5_CEREH Uncharacterized protein OS=Cervus elaphus hippelaphus OX=46360 GN=Celaphus_00015412 PE=4 SV=1	1	2	1	1	14.1	17.186	74394000	63195000	45726000	37427000	33059000	39974000
A0A212CT11	A0A212CT11;A0A212D1T8	tr|A0A212CT11|A0A212CT11_CEREH Uncharacterized protein OS=Cervus elaphus hippelaphus OX=46360 GN=Celaphus_00015464 PE=3 SV=1;tr|A0A212D1T8|A0A212D1T8_CEREH CKMT2 OS=Cervus elaphus hippelaphus OX=46360 GN=Celaphus_00003844 PE=3 SV=1	2	1	1	1	3.8	46.97	80457000	50684000	50288000	54627000	65353000	11336000
A0A212CT24	A0A212CT24	tr|A0A212CT24|A0A212CT24_CEREH Protein disulfide-isomerase OS=Cervus elaphus hippelaphus OX=46360 GN=Celaphus_00015467 PE=3 SV=1	1	19	19	19	44.9	55.645	981010000	680950000	717500000	444130000	479010000	482760000
A0A212CT48	A0A212CT48	tr|A0A212CT48|A0A212CT48_CEREH WARS OS=Cervus elaphus hippelaphus OX=46360 GN=Celaphus_00015539 PE=3 SV=1	1	3	3	3	10	62.4	21113000	28670000	34258000	38999000	41619000	23868000
A0A212CT53	A0A212CT53	tr|A0A212CT53|A0A212CT53_CEREH MFGE8 OS=Cervus elaphus hippelaphus OX=46360 GN=Celaphus_00015198 PE=4 SV=1	1	3	3	3	7.6	48.397			15243000
A0A212CT67	A0A212CT67	tr|A0A212CT67|A0A212CT67_CEREH Uncharacterized protein OS=Cervus elaphus hippelaphus OX=46360 GN=Celaphus_00015232 PE=4 SV=1	1	10	10	10	11.4	174.68		50519000	84194000	69443000	90175000	75465000
A0A212CT69	A0A212CT69;A0A212CDJ0	tr|A0A212CT69|A0A212CT69_CEREH Uncharacterized protein (Fragment) OS=Cervus elaphus hippelaphus OX=46360 GN=Celaphus_00006296 PE=4 SV=1	2	3	2	2	18.5	19.197		91033000	81072000	99322000		92949000
A0A212CT83	A0A212CT83	tr|A0A212CT83|A0A212CT83_CEREH Uncharacterized protein OS=Cervus elaphus hippelaphus OX=46360 GN=Celaphus_00015333 PE=4 SV=1	1	3	3	3	11.8	27.669		25559000	21961000
A0A212CT84	A0A212CT84	tr|A0A212CT84|A0A212CT84_CEREH DNA-(apurinic or apyrimidinic site) lyase OS=Cervus elaphus hippelaphus OX=46360 GN=Celaphus_00006381 PE=3 SV=1	1	1	1	1	7.2	28.177			4937400	8809600		9217900
A0A212CTB7	A0A212CTB7	tr|A0A212CTB7|A0A212CTB7_CEREH Alpha-1,4 glucan phosphorylase OS=Cervus elaphus hippelaphus OX=46360 GN=Celaphus_00006288 PE=3 SV=1	1	1	1	1	7.6	19.157		9039000	10482000	8253600
A0A212CTC3	A0A212CTC3;A0A212CEZ4	tr|A0A212CTC3|A0A212CTC3_CEREH Pyruvate kinase (Fragment) OS=Cervus elaphus hippelaphus OX=46360 GN=Celaphus_00006562 PE=3 SV=1	2	25	25	25	55.5	57.036	1333700000	1126400000	1343900000	1446800000	1456900000	1346300000
A0A212CTQ3	A0A212CTQ3;A0A212DEA3	tr|A0A212CTQ3|A0A212CTQ3_CEREH Uncharacterized protein OS=Cervus elaphus hippelaphus OX=46360 GN=Celaphus_00006126 PE=4 SV=1;tr|A0A212DEA3|A0A212DEA3_CEREH COX4I1 (Fragment) OS=Cervus elaphus hippelaphus OX=46360 GN=Celaphus_00004017 PE=4 SV=1	2	5	3	3	15.1	34.969	57504000	52147000	87892000	75536000		77052000
A0A212CTV3	A0A212CTV3	tr|A0A212CTV3|A0A212CTV3_CEREH PSME1 OS=Cervus elaphus hippelaphus OX=46360 GN=Celaphus_00006521 PE=4 SV=1	1	5	5	5	24.3	26.823		25260000	23136000		19857000	34441000
A0A212CTV4	A0A212CTV4;A0A212DC95	tr|A0A212CTV4|A0A212CTV4_CEREH Uncharacterized protein (Fragment) OS=Cervus elaphus hippelaphus OX=46360 GN=Celaphus_00006255 PE=4 SV=1;tr|A0A212DC95|A0A212DC95_CEREH Uncharacterized protein OS=Cervus elaphus hippelaphus OX=46360 GN=Celaphus_00004838 PE=4	2	2	2	2	11	11.259	56781000	45651000	53869000	43598000		43662000
A0A212CTW7	A0A212CTW7	tr|A0A212CTW7|A0A212CTW7_CEREH FBN1 OS=Cervus elaphus hippelaphus OX=46360 GN=Celaphus_00006169 PE=4 SV=1	1	3	3	3	1.3	251.18		12857000	14642000
A0A212CTX7	A0A212CTX7;A0A212CB58	tr|A0A212CTX7|A0A212CTX7_CEREH Uncharacterized protein OS=Cervus elaphus hippelaphus OX=46360 GN=Celaphus_00005891 PE=4 SV=1	2	9	2	9	48.7	16.966	1171900000	2322400000	2002400000	1538400000	1496400000	1276200000
A0A212DDQ1	A0A212DDQ1;A0A212CTZ9	tr|A0A212DDQ1|A0A212DDQ1_CEREH GMFG OS=Cervus elaphus hippelaphus OX=46360 GN=Celaphus_00004419 PE=4 SV=1;tr|A0A212CTZ9|A0A212CTZ9_CEREH GMFB OS=Cervus elaphus hippelaphus OX=46360 GN=Celaphus_00006139 PE=4 SV=1	2	1	1	1	6.5	15.934			26330000			15650000
A0A212CU10	A0A212CU10	tr|A0A212CU10|A0A212CU10_CEREH FERMT2 OS=Cervus elaphus hippelaphus OX=46360 GN=Celaphus_00006145 PE=4 SV=1	1	1	1	1	5.8	30.11		17368000	20970000	42976000	16967000	32273000
A0A212CU17	A0A212CU17	tr|A0A212CU17|A0A212CU17_CEREH HEXA OS=Cervus elaphus hippelaphus OX=46360 GN=Celaphus_00006558 PE=4 SV=1	1	4	4	4	15.3	43.257		13730000	11708000	24064000	18269000	19069000
A0A212CU41	A0A212CU41;A0A212DEX6;A0A212C739	tr|A0A212CU41|A0A212CU41_CEREH Uncharacterized protein OS=Cervus elaphus hippelaphus OX=46360 GN=Celaphus_00006619 PE=3 SV=1	3	3	3	3	16.9	19.905	21973000	52141000	63033000	30874000	51215000	36267000
A0A212CU54	A0A212CU54	tr|A0A212CU54|A0A212CU54_CEREH TPM1 OS=Cervus elaphus hippelaphus OX=46360 GN=Celaphus_00006250 PE=3 SV=1	1	9	1	1	30.2	28.721	22913000
A0A212CU61	A0A212CU61	tr|A0A212CU61|A0A212CU61_CEREH RPLP1 OS=Cervus elaphus hippelaphus OX=46360 GN=Celaphus_00006572 PE=3 SV=1	1	2	2	2	51.3	11.832	252940000	281980000	312600000	232180000	260040000	203830000
A0A212CUA0	A0A212CUA0;A0A212C202	tr|A0A212CUA0|A0A212CUA0_CEREH Uncharacterized protein (Fragment) OS=Cervus elaphus hippelaphus OX=46360 GN=Celaphus_00006282 PE=4 SV=1	2	3	3	3	23.4	19.883		9310800	8375300	5596000
A0A212CUB3	A0A212CUB3	tr|A0A212CUB3|A0A212CUB3_CEREH HNRNPC (Fragment) OS=Cervus elaphus hippelaphus OX=46360 GN=Celaphus_00006486 PE=4 SV=1	1	2	2	2	15	16.72		14933000			18374000	18086000
A0A212CUJ7	A0A212CUJ7	tr|A0A212CUJ7|A0A212CUJ7_CEREH NEK9 OS=Cervus elaphus hippelaphus OX=46360 GN=Celaphus_00005979 PE=4 SV=1	1	3	3	3	3.2	124.33		48039000	43370000		40755000	45918000
A0A212CUK9	A0A212CUK9;A0A212CNJ3;A0A212CN01;A0A212CVL7;A0A212D9D9	tr|A0A212CUK9|A0A212CUK9_CEREH Uncharacterized protein OS=Cervus elaphus hippelaphus OX=46360 GN=Celaphus_00006415 PE=3 SV=1;tr|A0A212CNJ3|A0A212CNJ3_CEREH Uncharacterized protein OS=Cervus elaphus hippelaphus OX=46360 GN=Celaphus_00008450 PE=3 SV=1;tr|A0A	5	14	7	14	47.5	42.019	12558000000	9447300000	10386000000	10524000000	8688400000	9732500000
A0A212CUS9	A0A212CUS9	tr|A0A212CUS9|A0A212CUS9_CEREH DLST (Fragment) OS=Cervus elaphus hippelaphus OX=46360 GN=Celaphus_00005986 PE=4 SV=1	1	5	5	5	15.2	39.277		83194000	66397000		45639000
A0A212CUT3	A0A212CUT3	tr|A0A212CUT3|A0A212CUT3_CEREH Proteasome subunit alpha type OS=Cervus elaphus hippelaphus OX=46360 GN=Celaphus_00006119 PE=3 SV=1	1	1	1	1	5.5	28.419		71822000	29733000	60124000	19518000	58700000
A0A212CUV1	A0A212CUV1	tr|A0A212CUV1|A0A212CUV1_CEREH ACTR10 OS=Cervus elaphus hippelaphus OX=46360 GN=Celaphus_00006120 PE=3 SV=1	1	1	1	1	5.1	39.506			3323700
A0A212CUW8	A0A212CUW8	tr|A0A212CUW8|A0A212CUW8_CEREH Alpha-1,4 glucan phosphorylase OS=Cervus elaphus hippelaphus OX=46360 GN=Celaphus_00006289 PE=3 SV=1	1	4	4	4	9.6	60.285		7686200	10109000	9804700	13191000	12374000
A0A212CUX4	A0A212CUX4;A0A212CNL0	tr|A0A212CUX4|A0A212CUX4_CEREH Peptidyl-prolyl cis-trans isomerase (Fragment) OS=Cervus elaphus hippelaphus OX=46360 GN=Celaphus_00006267 PE=3 SV=1	2	8	7	8	46	19.387	800750000	1361900000	1170100000	1040800000	1154300000	1027000000
A0A212CUY1	A0A212CUY1	tr|A0A212CUY1|A0A212CUY1_CEREH Uncharacterized protein OS=Cervus elaphus hippelaphus OX=46360 GN=Celaphus_00006066 PE=4 SV=1	1	1	1	1	3.6	37.608
A0A212CV04	A0A212CV04	tr|A0A212CV04|A0A212CV04_CEREH ATP6V1D OS=Cervus elaphus hippelaphus OX=46360 GN=Celaphus_00006067 PE=4 SV=1	1	1	1	1	12.2	14.576		25090000
A0A212CV09	A0A212CV09	tr|A0A212CV09|A0A212CV09_CEREH Spectrin beta chain OS=Cervus elaphus hippelaphus OX=46360 GN=Celaphus_00006080 PE=3 SV=1	1	24	24	24	13.8	264.92	3819200	276850000	121780000	17098000	13534000	20836000
A0A212CV20	A0A212CV20	tr|A0A212CV20|A0A212CV20_CEREH DUOX1 OS=Cervus elaphus hippelaphus OX=46360 GN=Celaphus_00006150 PE=4 SV=1	1	1	1	1	0.7	156.99			42072000	32967000
A0A212CV25	A0A212CV25;A0A212CNB0	tr|A0A212CV25|A0A212CV25_CEREH ACTN1 OS=Cervus elaphus hippelaphus OX=46360 GN=Celaphus_00006051 PE=4 SV=1	2	16	13	16	29.8	78.026	199050000	647660000	631420000	705320000	681070000	887540000
A0A212CV68	A0A212CV68	tr|A0A212CV68|A0A212CV68_CEREH ACTN1 (Fragment) OS=Cervus elaphus hippelaphus OX=46360 GN=Celaphus_00006050 PE=4 SV=1	1	7	4	4	27.9	28.145	27019000	25876000	27054000	36896000	41564000
A0A212CV82	A0A212CV82	tr|A0A212CV82|A0A212CV82_CEREH Dolichyl-diphosphooligosaccharide--protein glycosyltransferase subunit DAD1 OS=Cervus elaphus hippelaphus OX=46360 GN=Celaphus_00006465 PE=3 SV=1	1	3	3	3	26.4	13.511	29893000	26453000	44033000
A0A212CVB9	A0A212CVB9	tr|A0A212CVB9|A0A212CVB9_CEREH RAB2B OS=Cervus elaphus hippelaphus OX=46360 GN=Celaphus_00006481 PE=4 SV=1	1	4	4	4	21.8	24.115	32836000	99033000	143830000	98096000	99438000	72572000
A0A212CVD5	A0A212CVD5;Q1HI14	tr|A0A212CVD5|A0A212CVD5_CEREH Beta-2-microglobulin OS=Cervus elaphus hippelaphus OX=46360 GN=Celaphus_00005883 PE=3 SV=1;tr|Q1HI14|Q1HI14_CEREL Beta-2-microglobulin (Fragment) OS=Cervus elaphus OX=9860 PE=2 SV=1	2	2	2	2	20.3	13.576		8116100
A0A212CVE3	A0A212CVE3	tr|A0A212CVE3|A0A212CVE3_CEREH RPL4 OS=Cervus elaphus hippelaphus OX=46360 GN=Celaphus_00006592 PE=4 SV=1	1	3	1	1	12	32.975		10107000	23143000
A0A212CVF4	A0A212CVF4	tr|A0A212CVF4|A0A212CVF4_CEREH RNASE4 OS=Cervus elaphus hippelaphus OX=46360 GN=Celaphus_00006444 PE=3 SV=1	1	1	1	1	2.9	51.727		12434000
A0A212CVF8	A0A212CVF8	tr|A0A212CVF8|A0A212CVF8_CEREH REEP5 (Fragment) OS=Cervus elaphus hippelaphus OX=46360 GN=Celaphus_00006682 PE=4 SV=1	1	1	1	1	11.4	7.7051		97646000	82497000	14557000		21509000
A0A212CVG3	A0A212CVG3	tr|A0A212CVG3|A0A212CVG3_CEREH TPM1 (Fragment) OS=Cervus elaphus hippelaphus OX=46360 GN=Celaphus_00006249 PE=4 SV=1	1	7	3	3	54.9	13.868	58018000	64476000	54869000			77502000
A0A212CVI7	A0A212CVI7;G5CW09	tr|A0A212CVI7|A0A212CVI7_CEREH Uncharacterized protein OS=Cervus elaphus hippelaphus OX=46360 GN=Celaphus_00005334 PE=4 SV=1	2	4	4	4	1.3	490.88		19586000	23835000
A0A212CVJ8	A0A212CVJ8	tr|A0A212CVJ8|A0A212CVJ8_CEREH HPCAL1 OS=Cervus elaphus hippelaphus OX=46360 GN=Celaphus_00005292 PE=4 SV=1	1	3	3	3	11.8	28.711		10432000	12326000	15926000		20657000
A0A212CVP2	A0A212CVP2	tr|A0A212CVP2|A0A212CVP2_CEREH HADHA OS=Cervus elaphus hippelaphus OX=46360 GN=Celaphus_00005371 PE=3 SV=1	1	1	1	1	2.8	83.47			6874800
A0A212CVP8	A0A212CVP8	tr|A0A212CVP8|A0A212CVP8_CEREH CCT4 (Fragment) OS=Cervus elaphus hippelaphus OX=46360 GN=Celaphus_00005485 PE=3 SV=1	1	2	2	2	8.3	34.766
A0A212CVQ5	A0A212CVQ5	tr|A0A212CVQ5|A0A212CVQ5_CEREH DDX31 (Fragment) OS=Cervus elaphus hippelaphus OX=46360 GN=Celaphus_00005110 PE=4 SV=1	1	1	1	1	3	43.427		7305100
A0A212CVR5	A0A212CVR5	tr|A0A212CVR5|A0A212CVR5_CEREH Uncharacterized protein OS=Cervus elaphus hippelaphus OX=46360 GN=Celaphus_00005210 PE=4 SV=1	1	1	1	1	3.7	76.61		4580900	4078800
A0A212CVR6	A0A212CVR6	tr|A0A212CVR6|A0A212CVR6_CEREH Proteasome subunit beta type OS=Cervus elaphus hippelaphus OX=46360 GN=Celaphus_00006451 PE=3 SV=1	1	6	6	6	26.6	28.655		69674000	62100000
A0A212CVR7	A0A212CVR7	tr|A0A212CVR7|A0A212CVR7_CEREH Uncharacterized protein OS=Cervus elaphus hippelaphus OX=46360 GN=Celaphus_00005466 PE=4 SV=1	1	6	3	6	38.9	19.373	259060000	181970000	157370000	146540000	275390000	152360000
A0A212CVS3	A0A212CVS3	tr|A0A212CVS3|A0A212CVS3_CEREH PCBP1 (Fragment) OS=Cervus elaphus hippelaphus OX=46360 GN=Celaphus_00005440 PE=4 SV=1	1	6	5	6	29.1	34.031	55503000	106110000	81595000			58394000
A0A212CVX1	A0A212CVX1;A0A212CNH8	tr|A0A212CVX1|A0A212CVX1_CEREH RPL7A OS=Cervus elaphus hippelaphus OX=46360 GN=Celaphus_00005078 PE=4 SV=1	2	3	2	3	11.9	24.679		49443000	117790000	76897000	73199000	96883000
A0A212CW17	A0A212CW17	tr|A0A212CW17|A0A212CW17_CEREH PCYOX1 (Fragment) OS=Cervus elaphus hippelaphus OX=46360 GN=Celaphus_00005434 PE=4 SV=1	1	5	5	5	20.3	38.24	77948000	38282000	46377000	34740000	44315000	37826000
A0A212CW37	A0A212CW37	tr|A0A212CW37|A0A212CW37_CEREH ACTR2 (Fragment) OS=Cervus elaphus hippelaphus OX=46360 GN=Celaphus_00005465 PE=3 SV=1	1	3	3	3	18	27.811		41100000	33344000	36680000	71044000
A0A212CWA2	A0A212CWA2	tr|A0A212CWA2|A0A212CWA2_CEREH SPTAN1 OS=Cervus elaphus hippelaphus OX=46360 GN=Celaphus_00005177 PE=4 SV=1	1	2	2	2	1.2	289.59		7736800	8351700	11949000	15650000	11679000
A0A212CWC0	A0A212CWC0	tr|A0A212CWC0|A0A212CWC0_CEREH SURF4 OS=Cervus elaphus hippelaphus OX=46360 GN=Celaphus_00005075 PE=4 SV=1	1	1	1	1	4.5	32.014		28975000	33103000			13081000
A0A212CWI1	A0A212CWI1	tr|A0A212CWI1|A0A212CWI1_CEREH Uncharacterized protein (Fragment) OS=Cervus elaphus hippelaphus OX=46360 GN=Celaphus_00004990 PE=4 SV=1	1	5	5	5	8.8	73.021	86980000	79233000	71058000	101670000	74900000	75759000
A0A212CWI9	A0A212CWI9	tr|A0A212CWI9|A0A212CWI9_CEREH HSPA5 OS=Cervus elaphus hippelaphus OX=46360 GN=Celaphus_00005231 PE=3 SV=1	1	23	1	23	46	67.386	850100000	1161100000	1243200000	972480000	1183800000	1016900000
A0A212CWJ6	A0A212CWJ6	tr|A0A212CWJ6|A0A212CWJ6_CEREH Ferritin OS=Cervus elaphus hippelaphus OX=46360 GN=Celaphus_00005046 PE=3 SV=1	1	1	1	1	14.3	12.721		57634000	40078000	41824000	29951000
A0A212CWP5	A0A212CWP5	tr|A0A212CWP5|A0A212CWP5_CEREH CCT7 (Fragment) OS=Cervus elaphus hippelaphus OX=46360 GN=Celaphus_00005755 PE=3 SV=1	1	3	3	3	7	62.403			5871600
A0A212CWP8	A0A212CWP8	tr|A0A212CWP8|A0A212CWP8_CEREH Reticulon (Fragment) OS=Cervus elaphus hippelaphus OX=46360 GN=Celaphus_00005605 PE=4 SV=1	1	1	1	1	12.3	12.754			10401000
A0A212CWR7	A0A212CWR7	tr|A0A212CWR7|A0A212CWR7_CEREH CGREF1 OS=Cervus elaphus hippelaphus OX=46360 GN=Celaphus_00005385 PE=4 SV=1	1	7	7	7	31	31.21	150250000	82227000	106610000	57378000	77138000	62386000
A0A212CWS1	A0A212CWS1	tr|A0A212CWS1|A0A212CWS1_CEREH UGP2 OS=Cervus elaphus hippelaphus OX=46360 GN=Celaphus_00005475 PE=4 SV=1	1	1	1	1	17.9	9.1422		30617000
A0A212CWT5	A0A212CWT5	tr|A0A212CWT5|A0A212CWT5_CEREH Serine/threonine-protein phosphatase 2A activator OS=Cervus elaphus hippelaphus OX=46360 GN=Celaphus_00005159 PE=3 SV=1	1	2	2	2	10.9	40.213		37710000	52192000	44393000	77752000	76915000
A0A212CWT9	A0A212CWT9;A0A212D2M7	tr|A0A212CWT9|A0A212CWT9_CEREH Uncharacterized protein OS=Cervus elaphus hippelaphus OX=46360 GN=Celaphus_00005211 PE=4 SV=1	2	3	2	3	46.3	9.0422		33356000	43860000	42852000	59644000	43077000
A0A212CWU8	A0A212CWU8;A0A212C146;A0A212D3Q0;A0A212C797	tr|A0A212CWU8|A0A212CWU8_CEREH Uncharacterized protein OS=Cervus elaphus hippelaphus OX=46360 GN=Celaphus_00005811 PE=4 SV=1	4	4	4	4	28.3	12.952		136000000	102460000		73941000
A0A212CWU9	A0A212CWU9	tr|A0A212CWU9|A0A212CWU9_CEREH C8G OS=Cervus elaphus hippelaphus OX=46360 GN=Celaphus_00005010 PE=3 SV=1	1	4	4	4	23.8	22.515		33926000	20376000	39296000	39049000	33728000
A0A212CWX8	A0A212CWX8	tr|A0A212CWX8|A0A212CWX8_CEREH RPS27A OS=Cervus elaphus hippelaphus OX=46360 GN=Celaphus_00005602 PE=4 SV=1	1	1	1	1	12.3	14.979	182330000	645680000	516800000	685000000	446100000	852660000
A0A212CWY8	A0A212CWY8	tr|A0A212CWY8|A0A212CWY8_CEREH Uncharacterized protein OS=Cervus elaphus hippelaphus OX=46360 GN=Celaphus_00005190 PE=3 SV=1	1	7	7	7	36.2	22.897		23131000	46211000	117610000	101820000	98368000
A0A212CX07	A0A212CX07	tr|A0A212CX07|A0A212CX07_CEREH UGP2 OS=Cervus elaphus hippelaphus OX=46360 GN=Celaphus_00005474 PE=4 SV=1	1	3	3	3	6.7	43.314		2450700	15959000
A0A212CX34	A0A212CX34	tr|A0A212CX34|A0A212CX34_CEREH PSMD13 OS=Cervus elaphus hippelaphus OX=46360 GN=Celaphus_00004964 PE=4 SV=1	1	1	1	1	2.6	43.2
A0A212CX37	A0A212CX37	tr|A0A212CX37|A0A212CX37_CEREH Annexin (Fragment) OS=Cervus elaphus hippelaphus OX=46360 GN=Celaphus_00005444 PE=3 SV=1	1	12	12	12	45.7	35.123	259500000	264780000	301900000	231830000	244600000	240060000
A0A212CX59	A0A212CX59	tr|A0A212CX59|A0A212CX59_CEREH HADHB (Fragment) OS=Cervus elaphus hippelaphus OX=46360 GN=Celaphus_00005373 PE=3 SV=1	1	2	2	2	6.6	35.765		9358100
A0A212CX69	A0A212CX69	tr|A0A212CX69|A0A212CX69_CEREH Uncharacterized protein (Fragment) OS=Cervus elaphus hippelaphus OX=46360 GN=Celaphus_00004988 PE=4 SV=1	1	2	2	2	15.2	25.014	31241000	35429000	30773000	55306000		30542000
A0A212CXB0	A0A212CXB0	tr|A0A212CXB0|A0A212CXB0_CEREH MDH1 (Fragment) OS=Cervus elaphus hippelaphus OX=46360 GN=Celaphus_00005477 PE=4 SV=1	1	4	4	4	27.9	17.785	69961000	52476000	46867000	65994000	144340000	103860000
A0A212CXE8	A0A212CXE8	tr|A0A212CXE8|A0A212CXE8_CEREH RAB10 (Fragment) OS=Cervus elaphus hippelaphus OX=46360 GN=Celaphus_00005369 PE=4 SV=1	1	1	1	1	8.8	15.399
A0A212CXI6	A0A212CXI6	tr|A0A212CXI6|A0A212CXI6_CEREH SPR OS=Cervus elaphus hippelaphus OX=46360 GN=Celaphus_00005749 PE=4 SV=1	1	3	3	3	16.5	28.959	15052000	21105000	4408300	45579000	45566000	48401000
A0A212D4U6	A0A212D4U6;A6YLN1;A0A212CXL4	tr|A0A212D4U6|A0A212D4U6_CEREH Uncharacterized protein OS=Cervus elaphus hippelaphus OX=46360 GN=Celaphus_00014250 PE=4 SV=1;tr|A6YLN1|A6YLN1_CEREL Arginine/serine-rich 7 splicing factor (Fragment) OS=Cervus elaphus OX=9860 GN=SFRS7 PE=2 SV=1;tr|A0A212CXL4	3	1	1	1	8.5	19.329	12970000	20639000	18118000	21895000	15525000	17162000
A0A212CXN8	A0A212CXN8	tr|A0A212CXN8|A0A212CXN8_CEREH MDH1 (Fragment) OS=Cervus elaphus hippelaphus OX=46360 GN=Celaphus_00005476 PE=4 SV=1	1	7	7	7	50.6	18.54		319190000	284720000	356240000	362700000	391360000
A0A212CXQ1	A0A212CXQ1	tr|A0A212CXQ1|A0A212CXQ1_CEREH SET (Fragment) OS=Cervus elaphus hippelaphus OX=46360 GN=Celaphus_00005175 PE=3 SV=1	1	1	1	1	9.4	13.749	20800000	34328000
A0A212CXR2	A0A212CXR2	tr|A0A212CXR2|A0A212CXR2_CEREH AK1 (Fragment) OS=Cervus elaphus hippelaphus OX=46360 GN=Celaphus_00005199 PE=3 SV=1	1	1	1	1	7.4	20.788				41565000	36063000	38688000
A0A212CXT4	A0A212CXT4	tr|A0A212CXT4|A0A212CXT4_CEREH GALM OS=Cervus elaphus hippelaphus OX=46360 GN=Celaphus_00005686 PE=4 SV=1	1	3	3	3	21.1	21.079		43658000	21261000	33055000	29480000	28118000
A0A212CXU5	A0A212CXU5	tr|A0A212CXU5|A0A212CXU5_CEREH CAPG (Fragment) OS=Cervus elaphus hippelaphus OX=46360 GN=Celaphus_00005506 PE=4 SV=1	1	5	5	5	22	32.653	84458000	67304000	32977000
A0A212CXX1	A0A212CXX1	tr|A0A212CXX1|A0A212CXX1_CEREH Uncharacterized protein (Fragment) OS=Cervus elaphus hippelaphus OX=46360 GN=Celaphus_00005024 PE=4 SV=1	1	1	1	1	8.4	25.514		11021000	6705300
A0A212CY13	A0A212CY13	tr|A0A212CY13|A0A212CY13_CEREH Mitochondrial fission 1 protein OS=Cervus elaphus hippelaphus OX=46360 GN=Celaphus_00007222 PE=3 SV=1	1	2	2	2	17.8	16.91	10989000	9964300	18302000		12016000	10839000
A0A212CY21	A0A212CY21	tr|A0A212CY21|A0A212CY21_CEREH Uncharacterized protein OS=Cervus elaphus hippelaphus OX=46360 GN=Celaphus_00005296 PE=3 SV=1	1	10	10	10	31.7	47.489	359010000	516230000	444200000	402370000	436760000	430470000
A0A212CY32	A0A212CY32	tr|A0A212CY32|A0A212CY32_CEREH ARPC1B OS=Cervus elaphus hippelaphus OX=46360 GN=Celaphus_00007298 PE=4 SV=1	1	3	3	3	11.3	33.686			18405000
A0A212CY70	A0A212CY70	tr|A0A212CY70|A0A212CY70_CEREH Uncharacterized protein OS=Cervus elaphus hippelaphus OX=46360 GN=Celaphus_00007066 PE=3 SV=1	1	1	1	1	21.6	10.172		15252000	13499000	18528000	9878700	12596000
A0A212CY87	A0A212CY87;A0A212D744;A0A212DFX7	tr|A0A212CY87|A0A212CY87_CEREH Serine/threonine-protein phosphatase OS=Cervus elaphus hippelaphus OX=46360 GN=Celaphus_00005419 PE=3 SV=1;tr|A0A212D744|A0A212D744_CEREH Serine/threonine-protein phosphatase OS=Cervus elaphus hippelaphus OX=46360 GN=Celaphus	3	1	1	1	5.7	27.851			16842000
A0A212CY92	A0A212CY92	tr|A0A212CY92|A0A212CY92_CEREH Uncharacterized protein OS=Cervus elaphus hippelaphus OX=46360 GN=Celaphus_00007297 PE=4 SV=1	1	1	1	1	21.1	8.6077
A0A212CYB8	A0A212CYB8	tr|A0A212CYB8|A0A212CYB8_CEREH AHSP (Fragment) OS=Cervus elaphus hippelaphus OX=46360 GN=Celaphus_00007134 PE=4 SV=1	1	1	1	1	10.8	11.887		16197000	18384000
A0A212CYD3	A0A212CYD3	tr|A0A212CYD3|A0A212CYD3_CEREH PALB2 (Fragment) OS=Cervus elaphus hippelaphus OX=46360 GN=Celaphus_00007015 PE=4 SV=1	1	1	1	1	1.1	118.14		15426000
A0A212CYD7	A0A212CYD7;A0S012;Q28242	tr|A0A212CYD7|A0A212CYD7_CEREH ACTB OS=Cervus elaphus hippelaphus OX=46360 GN=Celaphus_00007342 PE=3 SV=1;tr|A0S012|A0S012_CEREL Beta-actin (Fragment) OS=Cervus elaphus OX=9860 PE=2 SV=1	3	12	4	5	64.7	29.889	2706500000	4157800000	5354800000	4658000000	4163000000	3841600000
A0A212CYL1	A0A212CYL1	tr|A0A212CYL1|A0A212CYL1_CEREH AP5Z1 OS=Cervus elaphus hippelaphus OX=46360 GN=Celaphus_00007350 PE=4 SV=1	1	2	2	2	3.1	91.104		11896000	5320000
A0A212CYP4	A0A212CYP4	tr|A0A212CYP4|A0A212CYP4_CEREH GUSB OS=Cervus elaphus hippelaphus OX=46360 GN=Celaphus_00007152 PE=4 SV=1	1	4	4	4	11.2	40.775		15770000	19512000	38691000		25189000
A0A212CYP8	A0A212CYP8	tr|A0A212CYP8|A0A212CYP8_CEREH Uncharacterized protein OS=Cervus elaphus hippelaphus OX=46360 GN=Celaphus_00007058 PE=4 SV=1	1	1	1	1	1.6	72.299	16404000		11106000			14638000
A0A212CYS5	A0A212CYS5	tr|A0A212CYS5|A0A212CYS5_CEREH ATP5J2 (Fragment) OS=Cervus elaphus hippelaphus OX=46360 GN=Celaphus_00007293 PE=4 SV=1	1	2	2	2	22	12.506	61330000	78457000	80089000	30831000	49515000	69692000
A0A212CYY8	A0A212CYY8	tr|A0A212CYY8|A0A212CYY8_CEREH FSCN1 (Fragment) OS=Cervus elaphus hippelaphus OX=46360 GN=Celaphus_00007340 PE=4 SV=1	1	11	11	11	47.1	32.565	197720000	338360000	414970000	345480000	298680000	354840000
A0A212CYZ6	A0A212CYZ6	tr|A0A212CYZ6|A0A212CYZ6_CEREH PCOLCE OS=Cervus elaphus hippelaphus OX=46360 GN=Celaphus_00007252 PE=4 SV=1	1	16	16	16	48	72.607	852600000	514120000	673080000	688120000	741830000	930520000
A0A212CZ15	A0A212CZ15	tr|A0A212CZ15|A0A212CZ15_CEREH IGFALS OS=Cervus elaphus hippelaphus OX=46360 GN=Celaphus_00006764 PE=4 SV=1	1	6	6	6	18.2	65.518	83493000	68905000	77790000	77362000	58166000	78632000
A0A212CZ32	A0A212CZ32	tr|A0A212CZ32|A0A212CZ32_CEREH Acyl carrier protein OS=Cervus elaphus hippelaphus OX=46360 GN=Celaphus_00007014 PE=3 SV=1	1	1	1	1	9	17.422
A0A212CZ37	A0A212CZ37	tr|A0A212CZ37|A0A212CZ37_CEREH VASN OS=Cervus elaphus hippelaphus OX=46360 GN=Celaphus_00006869 PE=4 SV=1	1	1	1	1	7.6	39.503			9040900	10772000
A0A212CZ38	A0A212CZ38	tr|A0A212CZ38|A0A212CZ38_CEREH MVP (Fragment) OS=Cervus elaphus hippelaphus OX=46360 GN=Celaphus_00007089 PE=4 SV=1	1	1	1	1	4.6	76.897		8843000	12793000
A0A212CZ49	A0A212CZ49;A0A212CMC7	tr|A0A212CZ49|A0A212CZ49_CEREH Fructose-bisphosphate aldolase OS=Cervus elaphus hippelaphus OX=46360 GN=Celaphus_00007074 PE=3 SV=1	2	10	10	10	22.8	44.739	421720000	321260000	358900000	346380000	291480000	293970000
A0A212CZ96	A0A212CZ96	tr|A0A212CZ96|A0A212CZ96_CEREH HBA OS=Cervus elaphus hippelaphus OX=46360 GN=Celaphus_00006696 PE=3 SV=1	1	12	4	4	29.6	42.766	17627000000	7463100000	18839000000	1307500000	521960000	756800000
A0A212CZB2	A0A212CZB2	tr|A0A212CZB2|A0A212CZB2_CEREH Sulfotransferase OS=Cervus elaphus hippelaphus OX=46360 GN=Celaphus_00007064 PE=3 SV=1	1	2	2	2	6.8	34.441		34809000	20978000			33483000
A0A212CZC1	A0A212CZC1;A0A212CCY0	tr|A0A212CZC1|A0A212CZC1_CEREH Uncharacterized protein OS=Cervus elaphus hippelaphus OX=46360 GN=Celaphus_00006949 PE=3 SV=1	2	5	2	2	12.7	44.277	67435000	48997000	70474000	8745300	18150000	20372000
A0A212CZC5	A0A212CZC5	tr|A0A212CZC5|A0A212CZC5_CEREH MYH11 OS=Cervus elaphus hippelaphus OX=46360 GN=Celaphus_00006948 PE=4 SV=1	1	6	4	4	8.6	83.192		53595000	70762000		14477000
A0A212CZE3	A0A212CZE3	tr|A0A212CZE3|A0A212CZE3_CEREH FUS OS=Cervus elaphus hippelaphus OX=46360 GN=Celaphus_00007132 PE=4 SV=1	1	2	2	2	4.5	51.922		29389000
A0A212CZH3	A0A212CZH3;A0A212CZU2	tr|A0A212CZH3|A0A212CZH3_CEREH Uncharacterized protein OS=Cervus elaphus hippelaphus OX=46360 GN=Celaphus_00007328 PE=4 SV=1;tr|A0A212CZU2|A0A212CZU2_CEREH Uncharacterized protein OS=Cervus elaphus hippelaphus OX=46360 GN=Celaphus_00007327 PE=4 SV=1	2	4	3	4	42.6	12.243		59313000
A0A212CZN9	A0A212CZN9	tr|A0A212CZN9|A0A212CZN9_CEREH CCT6A OS=Cervus elaphus hippelaphus OX=46360 GN=Celaphus_00007147 PE=4 SV=1	1	2	1	2	7.7	30.51		7605400	9543900	12571000	10357000	7621200
A0A212CZR4	A0A212CZR4	tr|A0A212CZR4|A0A212CZR4_CEREH RPS2 OS=Cervus elaphus hippelaphus OX=46360 GN=Celaphus_00006772 PE=3 SV=1	1	9	9	9	31.7	31.235	103770000	211370000	217590000	123580000	167460000	133490000
A0A212CZS4	A0A212CZS4;A0A212CR63;A0A212CJ56	tr|A0A212CZS4|A0A212CZS4_CEREH Uncharacterized protein OS=Cervus elaphus hippelaphus OX=46360 GN=Celaphus_00007248 PE=4 SV=1;tr|A0A212CR63|A0A212CR63_CEREH Uncharacterized protein OS=Cervus elaphus hippelaphus OX=46360 GN=Celaphus_00011047 PE=4 SV=1;tr|A0A	3	6	5	6	15.6	42.484	51232000	78608000	133240000	54177000	62637000	89148000
A0A212CZT5	A0A212CZT5	tr|A0A212CZT5|A0A212CZT5_CEREH AZGP1 OS=Cervus elaphus hippelaphus OX=46360 GN=Celaphus_00007280 PE=3 SV=1	1	2	2	2	10.3	36.591		14025000	11878000
A0A212CZZ6	A0A212CZZ6	tr|A0A212CZZ6|A0A212CZZ6_CEREH V-type proton ATPase proteolipid subunit OS=Cervus elaphus hippelaphus OX=46360 GN=Celaphus_00006807 PE=3 SV=1	1	2	2	2	17.6	14.483	40035000	15691000	20880000	33153000	25995000	35848000
A0A212D000	A0A212D000	tr|A0A212D000|A0A212D000_CEREH Uncharacterized protein OS=Cervus elaphus hippelaphus OX=46360 GN=Celaphus_00003504 PE=4 SV=1	1	8	8	8	42.3	41.505	66861000	90174000	128950000	98661000	78589000	103770000
A0A212D011	A0A212D011	tr|A0A212D011|A0A212D011_CEREH NDUFB10 OS=Cervus elaphus hippelaphus OX=46360 GN=Celaphus_00006771 PE=4 SV=1	1	1	1	1	9.4	15.549			12236000
A0A212D027	A0A212D027	tr|A0A212D027|A0A212D027_CEREH VCAN (Fragment) OS=Cervus elaphus hippelaphus OX=46360 GN=Celaphus_00003849 PE=4 SV=1	1	5	5	5	23.8	28.161	349270000	194270000	208250000	441040000	373420000	429990000
A0A212D039	A0A212D039	tr|A0A212D039|A0A212D039_CEREH Uncharacterized protein OS=Cervus elaphus hippelaphus OX=46360 GN=Celaphus_00002911 PE=4 SV=1	1	4	2	2	30.4	10.705		23125000	35167000
A0A212D040	A0A212D040;A0A212D514	tr|A0A212D040|A0A212D040_CEREH Uncharacterized protein OS=Cervus elaphus hippelaphus OX=46360 GN=Celaphus_00003754 PE=3 SV=1	2	6	6	6	62.9	16.273	143720000	124570000	172840000	164250000	87268000	106520000
A0A212D042	A0A212D042	tr|A0A212D042|A0A212D042_CEREH VDAC1 OS=Cervus elaphus hippelaphus OX=46360 GN=Celaphus_00003590 PE=4 SV=1	1	7	7	7	29.8	30.066	148390000	173010000	140410000	186530000	136260000	167140000
A0A212D050	A0A212D050	tr|A0A212D050|A0A212D050_CEREH Uncharacterized protein (Fragment) OS=Cervus elaphus hippelaphus OX=46360 GN=Celaphus_00003038 PE=3 SV=1	1	11	4	5	40.7	28.361	134080000	152670000	111280000	81889000
A0A212D054	A0A212D054	tr|A0A212D054|A0A212D054_CEREH CIRBP OS=Cervus elaphus hippelaphus OX=46360 GN=Celaphus_00003556 PE=4 SV=1	1	1	1	1	12.3	18.534		6839300
A0A212D070	A0A212D070	tr|A0A212D070|A0A212D070_CEREH COMP OS=Cervus elaphus hippelaphus OX=46360 GN=Celaphus_00002947 PE=4 SV=1	1	6	2	6	12.5	75.418		23724000	45525000
A0A212D076	A0A212D076	tr|A0A212D076|A0A212D076_CEREH ELAV-like protein OS=Cervus elaphus hippelaphus OX=46360 GN=Celaphus_00003243 PE=3 SV=1	1	1	1	1	3.9	40.253
A0A212D077	A0A212D077	tr|A0A212D077|A0A212D077_CEREH Tartrate-resistant acid phosphatase type 5 OS=Cervus elaphus hippelaphus OX=46360 GN=Celaphus_00003213 PE=4 SV=1	1	5	5	5	18.4	38.317		83849000	57056000	18436000
A0A212D0A9	A0A212D0A9;A0A212C0I1;A0A212D804;A0A212CF18	tr|A0A212D0A9|A0A212D0A9_CEREH EEF2 (Fragment) OS=Cervus elaphus hippelaphus OX=46360 GN=Celaphus_00003328 PE=4 SV=1	4	37	37	37	50.5	107.41	870620000	1169200000	1417500000	1204800000	918380000	1236900000
A0A212D0J2	A0A212D0J2	tr|A0A212D0J2|A0A212D0J2_CEREH Calponin OS=Cervus elaphus hippelaphus OX=46360 GN=Celaphus_00003546 PE=3 SV=1	1	3	2	3	19.6	24.422		82628000	87240000	96888000	54546000	69299000
A0A212D0J6	A0A212D0J6;A0A212C6U6	tr|A0A212D0J6|A0A212D0J6_CEREH HNRNPH1 OS=Cervus elaphus hippelaphus OX=46360 GN=Celaphus_00002882 PE=4 SV=1	2	4	4	4	12.8	48.155	58781000	43753000	47761000	43546000	59623000	47331000
A0A212D0K9	A0A212D0K9	tr|A0A212D0K9|A0A212D0K9_CEREH GPX3 OS=Cervus elaphus hippelaphus OX=46360 GN=Celaphus_00003763 PE=4 SV=1	1	1	1	1	5.1	26.863	24359000	9868400			19006000	15967000
A0A212D0L8	A0A212D0L8	tr|A0A212D0L8|A0A212D0L8_CEREH ATOX1 OS=Cervus elaphus hippelaphus OX=46360 GN=Celaphus_00003774 PE=4 SV=1	1	1	1	1	20.6	7.3654		17997000
A0A212D0R4	A0A212D0R4	tr|A0A212D0R4|A0A212D0R4_CEREH H2AFY (Fragment) OS=Cervus elaphus hippelaphus OX=46360 GN=Celaphus_00003607 PE=4 SV=1	1	3	3	3	19.7	22.681		32428000	23122000
A0A212D0S5	A0A212D0S5	tr|A0A212D0S5|A0A212D0S5_CEREH VCAN OS=Cervus elaphus hippelaphus OX=46360 GN=Celaphus_00003851 PE=4 SV=1	1	7	7	7	4.6	204.6	91478000	541250000	330310000	562240000	772220000	1003900000
A0A212D0T3	A0A212D0T3	tr|A0A212D0T3|A0A212D0T3_CEREH Annexin OS=Cervus elaphus hippelaphus OX=46360 GN=Celaphus_00003765 PE=3 SV=1	1	21	21	21	37.1	75.83	180090000	599410000	485240000	302600000	374040000	492060000
A0A212D0T4	A0A212D0T4	tr|A0A212D0T4|A0A212D0T4_CEREH PGLS OS=Cervus elaphus hippelaphus OX=46360 GN=Celaphus_00002989 PE=4 SV=1	1	3	3	3	30.3	22.641			4447800
A0A212D0U7	A0A212D0U7	tr|A0A212D0U7|A0A212D0U7_CEREH Serine/threonine-protein phosphatase OS=Cervus elaphus hippelaphus OX=46360 GN=Celaphus_00003594 PE=3 SV=1	1	1	1	1	4.5	28.089	22648000		12331000	14828000	14000000	18398000
A0A212D0U8	A0A212D0U8	tr|A0A212D0U8|A0A212D0U8_CEREH CAST (Fragment) OS=Cervus elaphus hippelaphus OX=46360 GN=Celaphus_00003887 PE=4 SV=1	1	2	2	2	9.4	33.929		12575000
A0A212D0W4	A0A212D0W4;A0A212CLB1;A0A212DHR4	tr|A0A212D0W4|A0A212D0W4_CEREH Histone H2B OS=Cervus elaphus hippelaphus OX=46360 GN=Celaphus_00002892 PE=3 SV=1	3	7	7	7	47.6	13.938	8827800000	7404800000	7934000000	9248600000	11016000000	8981700000
A0A212D0X3	A0A212D0X3	tr|A0A212D0X3|A0A212D0X3_CEREH CDC37 (Fragment) OS=Cervus elaphus hippelaphus OX=46360 GN=Celaphus_00003170 PE=4 SV=1	1	1	1	1	4.4	29.221
A0A212D0Y2	A0A212D0Y2	tr|A0A212D0Y2|A0A212D0Y2_CEREH PRKCSH OS=Cervus elaphus hippelaphus OX=46360 GN=Celaphus_00003207 PE=4 SV=1	1	3	3	3	6.8	54.718	17770000	26485000	22305000	20504000	26527000	28135000
A0A212D0Y3	A0A212D0Y3	tr|A0A212D0Y3|A0A212D0Y3_CEREH VCAN (Fragment) OS=Cervus elaphus hippelaphus OX=46360 GN=Celaphus_00003850 PE=4 SV=1	1	7	7	7	6.5	119.27	161500000	261690000	267270000	437040000	540660000	502750000
A0A212D101	A0A212D101	tr|A0A212D101|A0A212D101_CEREH NCLN OS=Cervus elaphus hippelaphus OX=46360 GN=Celaphus_00003353 PE=4 SV=1	1	1	1	1	3.2	49.853		4338100
A0A212D105	A0A212D105	tr|A0A212D105|A0A212D105_CEREH Alpha-mannosidase OS=Cervus elaphus hippelaphus OX=46360 GN=Celaphus_00003132 PE=3 SV=1	1	2	2	2	1.9	93.072
A0A212D132	A0A212D132	tr|A0A212D132|A0A212D132_CEREH Tubulin beta chain OS=Cervus elaphus hippelaphus OX=46360 GN=Celaphus_00003269 PE=3 SV=1	1	15	2	15	51.1	49.585	930230000	751670000	951720000	634690000	567810000	596400000
A0A212D157	A0A212D157	tr|A0A212D157|A0A212D157_CEREH TIMM13 OS=Cervus elaphus hippelaphus OX=46360 GN=Celaphus_00003367 PE=3 SV=1	1	2	2	2	26.3	10.47		19061000	17560000
A0A212D166	A0A212D166	tr|A0A212D166|A0A212D166_CEREH FAF2 OS=Cervus elaphus hippelaphus OX=46360 GN=Celaphus_00003459 PE=4 SV=1	1	1	1	1	4.3	49.432		3773400
A0A212D173	A0A212D173	tr|A0A212D173|A0A212D173_CEREH MATR3 (Fragment) OS=Cervus elaphus hippelaphus OX=46360 GN=Celaphus_00003643 PE=4 SV=1	1	3	3	3	6	110.92		21720000	24331000	10228000		8383700
A0A212D189	A0A212D189	tr|A0A212D189|A0A212D189_CEREH Peptidyl-prolyl cis-trans isomerase OS=Cervus elaphus hippelaphus OX=46360 GN=Celaphus_00003438 PE=3 SV=1	1	3	2	2	16	22.78	29308000	14635000	17323000	28015000	28116000	21957000
A0A212D191	A0A212D191	tr|A0A212D191|A0A212D191_CEREH LMNB1 OS=Cervus elaphus hippelaphus OX=46360 GN=Celaphus_00003426 PE=3 SV=1	1	8	7	7	27.5	39.906	63565000	56391000	65775000		49073000	42848000
A0A212D1A9	A0A212D1A9;A0A212D580	tr|A0A212D1A9|A0A212D1A9_CEREH Uncharacterized protein OS=Cervus elaphus hippelaphus OX=46360 GN=Celaphus_00003081 PE=4 SV=1	2	3	2	3	7	50.82		16818000		3629400
A0A212D1B1	A0A212D1B1	tr|A0A212D1B1|A0A212D1B1_CEREH PRDX2 OS=Cervus elaphus hippelaphus OX=46360 GN=Celaphus_00003121 PE=4 SV=1	1	8	8	8	59.1	21.805	1515500000	2189500000	1785800000	2692400000	2527500000	2130900000
A0A212D1H2	A0A212D1H2	tr|A0A212D1H2|A0A212D1H2_CEREH DPYSL3 (Fragment) OS=Cervus elaphus hippelaphus OX=46360 GN=Celaphus_00003722 PE=4 SV=1	1	2	2	2	14.4	16.217			19542000
A0A212D1I1	A0A212D1I1	tr|A0A212D1I1|A0A212D1I1_CEREH CANX (Fragment) OS=Cervus elaphus hippelaphus OX=46360 GN=Celaphus_00002878 PE=3 SV=1	1	5	5	5	15.6	46.611	85619000	123940000	75030000	68892000		43417000
A0A212D1I8	A0A212D1I8	tr|A0A212D1I8|A0A212D1I8_CEREH Uncharacterized protein (Fragment) OS=Cervus elaphus hippelaphus OX=46360 GN=Celaphus_00003145 PE=4 SV=1	1	1	1	1	7.3	33.027				24332000		25436000
A0A212D1J0	A0A212D1J0	tr|A0A212D1J0|A0A212D1J0_CEREH Uncharacterized protein (Fragment) OS=Cervus elaphus hippelaphus OX=46360 GN=Celaphus_00003775 PE=4 SV=1	1	2	2	2	7	42.724			9043200
A0A212D1L5	A0A212D1L5	tr|A0A212D1L5|A0A212D1L5_CEREH MYDGF OS=Cervus elaphus hippelaphus OX=46360 GN=Celaphus_00003306 PE=4 SV=1	1	2	2	2	23.9	11.399		20739000
A0A212D1N4	A0A212D1N4	tr|A0A212D1N4|A0A212D1N4_CEREH Uncharacterized protein OS=Cervus elaphus hippelaphus OX=46360 GN=Celaphus_00003177 PE=4 SV=1	1	2	2	2	4.5	88.776			8977300
A0A212D1P4	A0A212D1P4	tr|A0A212D1P4|A0A212D1P4_CEREH Clathrin light chain OS=Cervus elaphus hippelaphus OX=46360 GN=Celaphus_00003458 PE=3 SV=1	1	2	2	2	12.3	17.987	5552400	15095000
A0A212D1Q1	A0A212D1Q1	tr|A0A212D1Q1|A0A212D1Q1_CEREH LMAN2 (Fragment) OS=Cervus elaphus hippelaphus OX=46360 GN=Celaphus_00003477 PE=4 SV=1	1	1	1	1	7.6	28.54			20086000
A0A212D1Q2	A0A212D1Q2	tr|A0A212D1Q2|A0A212D1Q2_CEREH Uncharacterized protein OS=Cervus elaphus hippelaphus OX=46360 GN=Celaphus_00003615 PE=4 SV=1	1	19	19	19	44.6	72.076	765170000	494210000	608700000	440620000	395990000	423120000
A0A212D1V5	A0A212D1V5	tr|A0A212D1V5|A0A212D1V5_CEREH C3 (Fragment) OS=Cervus elaphus hippelaphus OX=46360 GN=Celaphus_00003155 PE=4 SV=1	1	2	2	2	1.6	136.36		2082900
A0A212D1W0	A0A212D1W0	tr|A0A212D1W0|A0A212D1W0_CEREH BSG OS=Cervus elaphus hippelaphus OX=46360 GN=Celaphus_00003526 PE=4 SV=1	1	1	1	1	3.8	26.256
A0A212D1X1	A0A212D1X1;A0A212CM79	tr|A0A212D1X1|A0A212D1X1_CEREH PTBP1 OS=Cervus elaphus hippelaphus OX=46360 GN=Celaphus_00003535 PE=4 SV=1	2	12	12	12	25.4	71.211	21937000	100760000	92258000	65358000	78817000	46504000
A0A212D200	A0A212D200	tr|A0A212D200|A0A212D200_CEREH ISYNA1 OS=Cervus elaphus hippelaphus OX=46360 GN=Celaphus_00002960 PE=4 SV=1	1	1	1	1	2.3	60.759		3746200
A0A212D225	A0A212D225	tr|A0A212D225|A0A212D225_CEREH TMED9 OS=Cervus elaphus hippelaphus OX=46360 GN=Celaphus_00003489 PE=3 SV=1	1	4	3	4	19.1	27.298	97605000	72218000	94222000	56359000	73903000	83760000
A0A212D229	A0A212D229;Q4KTX2	tr|A0A212D229|A0A212D229_CEREH HAPLN1 OS=Cervus elaphus hippelaphus OX=46360 GN=Celaphus_00003852 PE=4 SV=1	2	16	16	16	52.4	37.294	420870000	638120000	605890000
A0A212DFP3	A0A212DFP3;A0A212D238;A0A212D9H4	tr|A0A212DFP3|A0A212DFP3_CEREH Uncharacterized protein OS=Cervus elaphus hippelaphus OX=46360 GN=Celaphus_00011537 PE=3 SV=1;tr|A0A212D238|A0A212D238_CEREH Uncharacterized protein OS=Cervus elaphus hippelaphus OX=46360 GN=Celaphus_00002907 PE=3 SV=1;tr|A0A	3	6	4	6	42	20.601	262870000	383060000	481960000	363170000	265400000	333560000
A0A212D250	A0A212D250	tr|A0A212D250|A0A212D250_CEREH COPE OS=Cervus elaphus hippelaphus OX=46360 GN=Celaphus_00002943 PE=4 SV=1	1	5	5	5	23	39.836	73075000	65678000	46290000	114740000	86225000	92263000
A0A212D257	A0A212D257	tr|A0A212D257|A0A212D257_CEREH SPARC OS=Cervus elaphus hippelaphus OX=46360 GN=Celaphus_00003773 PE=4 SV=1	1	10	10	10	36.1	35.967	221190000	407440000	393500000	407400000	661420000	511360000
A0A212D262	A0A212D262	tr|A0A212D262|A0A212D262_CEREH HSPA9 OS=Cervus elaphus hippelaphus OX=46360 GN=Celaphus_00003638 PE=3 SV=1	1	2	2	2	6.4	35.969		25835000	32190000		27049000	22136000
A0A212D264	A0A212D264	tr|A0A212D264|A0A212D264_CEREH RPS15 OS=Cervus elaphus hippelaphus OX=46360 GN=Celaphus_00003563 PE=3 SV=1	1	4	4	4	43.4	17.026		39685000	25634000	24717000	24839000	22966000
A0A212D265	A0A212D265	tr|A0A212D265|A0A212D265_CEREH Uncharacterized protein OS=Cervus elaphus hippelaphus OX=46360 GN=Celaphus_00002910 PE=4 SV=1	1	3	1	1	37.7	8.9488
A0A212D2B0	A0A212D2B0;A0A212CUD4;A0A212CGJ8	tr|A0A212D2B0|A0A212D2B0_CEREH Uncharacterized protein OS=Cervus elaphus hippelaphus OX=46360 GN=Celaphus_00003250 PE=4 SV=1;tr|A0A212CUD4|A0A212CUD4_CEREH Uncharacterized protein (Fragment) OS=Cervus elaphus hippelaphus OX=46360 GN=Celaphus_00006600 PE=4	3	8	8	8	38.9	19.839	215160000	192050000	181240000	151740000	170650000	168050000
A0A212D2C8	A0A212D2C8	tr|A0A212D2C8|A0A212D2C8_CEREH LMNB2 OS=Cervus elaphus hippelaphus OX=46360 GN=Celaphus_00003366 PE=3 SV=1	1	6	5	5	10.2	67.021			7867700
A0A212D2D0	A0A212D2D0	tr|A0A212D2D0|A0A212D2D0_CEREH Uncharacterized protein OS=Cervus elaphus hippelaphus OX=46360 GN=Celaphus_00003040 PE=3 SV=1	1	1	1	1	2.2	66.412					138460000
A0A212D2I7	A0A212D2I7;A0A212D5Q1	tr|A0A212D2I7|A0A212D2I7_CEREH Glucosamine-6-phosphate isomerase OS=Cervus elaphus hippelaphus OX=46360 GN=Celaphus_00003699 PE=3 SV=1;tr|A0A212D5Q1|A0A212D5Q1_CEREH Glucosamine-6-phosphate isomerase OS=Cervus elaphus hippelaphus OX=46360 GN=Celaphus_00017	2	3	3	3	13.9	30.822	32478000	26221000	29179000	25422000	43807000	30215000
A0A212D2K0	A0A212D2K0	tr|A0A212D2K0|A0A212D2K0_CEREH C3 OS=Cervus elaphus hippelaphus OX=46360 GN=Celaphus_00003265 PE=4 SV=1	1	76	30	76	66.5	164.42	10539000000	11416000000	12556000000	9994500000	9203700000	9773700000
A0A212D2K9	A0A212D2K9	tr|A0A212D2K9|A0A212D2K9_CEREH Uncharacterized protein OS=Cervus elaphus hippelaphus OX=46360 GN=Celaphus_00003394 PE=4 SV=1	1	2	2	2	11.6	22.486	83575000	76048000	74878000	68607000	67977000
A0A212D2L3	A0A212D2L3	tr|A0A212D2L3|A0A212D2L3_CEREH HNRNPM OS=Cervus elaphus hippelaphus OX=46360 GN=Celaphus_00003252 PE=4 SV=1	1	3	3	3	6.5	67.821		29579000	33524000	31747000	40506000	24020000
A0A212D2L7	A0A212D2L7	tr|A0A212D2L7|A0A212D2L7_CEREH DPYSL3 (Fragment) OS=Cervus elaphus hippelaphus OX=46360 GN=Celaphus_00003721 PE=4 SV=1	1	7	5	6	43.1	25.058		51086000	42758000	41605000	46615000	72362000
A0A212D2P5	A0A212D2P5	tr|A0A212D2P5|A0A212D2P5_CEREH RARS (Fragment) OS=Cervus elaphus hippelaphus OX=46360 GN=Celaphus_00003840 PE=3 SV=1	1	2	2	2	5.4	50.924					12361000
A0A212D2Q6	A0A212D2Q6	tr|A0A212D2Q6|A0A212D2Q6_CEREH ATP5D OS=Cervus elaphus hippelaphus OX=46360 GN=Celaphus_00003554 PE=3 SV=1	1	3	3	3	28.6	17.623	118080000	166520000	121440000	83661000	78172000	76910000
A0A212D2U1	A0A212D2U1	tr|A0A212D2U1|A0A212D2U1_CEREH Receptor protein-tyrosine kinase OS=Cervus elaphus hippelaphus OX=46360 GN=Celaphus_00003747 PE=3 SV=1	1	1	1	1	1.5	110.6			10686000
A0A212D2W0	A0A212D2W0	tr|A0A212D2W0|A0A212D2W0_CEREH Histone H2A (Fragment) OS=Cervus elaphus hippelaphus OX=46360 GN=Celaphus_00003608 PE=3 SV=1	1	2	1	1	35.6	10.987				22873000		17195000
A0A212D2W9	A0A212D2W9	tr|A0A212D2W9|A0A212D2W9_CEREH 60S ribosomal protein L36 OS=Cervus elaphus hippelaphus OX=46360 GN=Celaphus_00003293 PE=3 SV=1	1	2	2	2	20	12.164	115700000	68366000	44034000	25379000	34177000	30952000
A0A212D2Z5	A0A212D2Z5	tr|A0A212D2Z5|A0A212D2Z5_CEREH FABP3 OS=Cervus elaphus hippelaphus OX=46360 GN=Celaphus_00014888 PE=3 SV=1	1	1	1	1	9.4	10.797	38456000	28164000
A0A212D310	A0A212D310	tr|A0A212D310|A0A212D310_CEREH TUBA1D OS=Cervus elaphus hippelaphus OX=46360 GN=Celaphus_00015017 PE=3 SV=1	1	9	2	3	44.8	25.83	466610000	496350000	671530000	401770000	340230000	366290000
A0A212D322	A0A212D322	tr|A0A212D322|A0A212D322_CEREH NUDC OS=Cervus elaphus hippelaphus OX=46360 GN=Celaphus_00014837 PE=4 SV=1	1	4	4	4	15.2	33.438		17192000	11342000	26412000		10134000
A0A212D331	A0A212D331	tr|A0A212D331|A0A212D331_CEREH RAD23A OS=Cervus elaphus hippelaphus OX=46360 GN=Celaphus_00003110 PE=4 SV=1	1	3	3	3	13.7	35.766		6222400		12697000	8408600
A0A212D354	A0A212D354	tr|A0A212D354|A0A212D354_CEREH Succinate dehydrogenase [ubiquinone] iron-sulfur subunit, mitochondrial (Fragment) OS=Cervus elaphus hippelaphus OX=46360 GN=Celaphus_00014681 PE=3 SV=1	1	1	1	1	3.9	29.196
A0A212D364	A0A212D364	tr|A0A212D364|A0A212D364_CEREH Uncharacterized protein OS=Cervus elaphus hippelaphus OX=46360 GN=Celaphus_00014744 PE=4 SV=1	1	21	21	21	20	167.22	70752000	284410000	294280000	62681000	21263000	101950000
A0A212D370	A0A212D370	tr|A0A212D370|A0A212D370_CEREH NDUFS1 OS=Cervus elaphus hippelaphus OX=46360 GN=Celaphus_00015116 PE=4 SV=1	1	3	3	3	7.2	74.031
A0A212D383	A0A212D383	tr|A0A212D383|A0A212D383_CEREH LYPLA2 OS=Cervus elaphus hippelaphus OX=46360 GN=Celaphus_00014777 PE=4 SV=1	1	1	1	1	11.3	24.767		12693000	12111000			10700000
A0A212D384	A0A212D384	tr|A0A212D384|A0A212D384_CEREH C1QC OS=Cervus elaphus hippelaphus OX=46360 GN=Celaphus_00014758 PE=4 SV=1	1	1	1	1	3.8	38.421			11852000
A0A212D3A3	A0A212D3A3;A0A212CSI7;A0A212C0Y4;A0A212CB03	tr|A0A212D3A3|A0A212D3A3_CEREH Tubulin alpha chain OS=Cervus elaphus hippelaphus OX=46360 GN=Celaphus_00015018 PE=3 SV=1	4	12	1	12	28.6	50.007	953540000	795690000	870790000	444990000	345710000	379830000
A0A212D3B1	A0A212D3B1	tr|A0A212D3B1|A0A212D3B1_CEREH DNPEP OS=Cervus elaphus hippelaphus OX=46360 GN=Celaphus_00015013 PE=3 SV=1	1	2	2	2	5.7	52.338		15964000	16880000	31943000	18392000	23076000
A0A212D3C2	A0A212D3C2	tr|A0A212D3C2|A0A212D3C2_CEREH Uncharacterized protein OS=Cervus elaphus hippelaphus OX=46360 GN=Celaphus_00014859 PE=4 SV=1	1	1	1	1	6.1	21.678		9026400
A0A212D3D4	A0A212D3D4	tr|A0A212D3D4|A0A212D3D4_CEREH Adenylate kinase 2, mitochondrial OS=Cervus elaphus hippelaphus OX=46360 GN=AK2 PE=3 SV=1	1	1	1	1	4.6	26.492	19098000	13848000	14371000
A0A212D3D5	A0A212D3D5	tr|A0A212D3D5|A0A212D3D5_CEREH Uncharacterized protein (Fragment) OS=Cervus elaphus hippelaphus OX=46360 GN=Celaphus_00014774 PE=4 SV=1	1	3	3	3	18	17.847	476370000	81523000	277650000	252410000	298690000	257210000
A0A212D3E2	A0A212D3E2	tr|A0A212D3E2|A0A212D3E2_CEREH STX12 OS=Cervus elaphus hippelaphus OX=46360 GN=Celaphus_00014850 PE=3 SV=1	1	1	1	1	6.6	26.342	18292000
A0A212D3G0	A0A212D3G0	tr|A0A212D3G0|A0A212D3G0_CEREH SH3BGRL3 OS=Cervus elaphus hippelaphus OX=46360 GN=Celaphus_00014819 PE=4 SV=1	1	3	3	3	33.7	10.908	123500000	131160000	55183000
A0A212D3G4	A0A212D3G4	tr|A0A212D3G4|A0A212D3G4_CEREH Uncharacterized protein OS=Cervus elaphus hippelaphus OX=46360 GN=Celaphus_00014745 PE=4 SV=1	1	1	1	1	10.9	15.593		6390500	7991200	5374000	8363000	5350100
A0A212D3J7	A0A212D3J7;A0A212CL71;A0A212D125	tr|A0A212D3J7|A0A212D3J7_CEREH Uncharacterized protein OS=Cervus elaphus hippelaphus OX=46360 GN=Celaphus_00014737 PE=4 SV=1	3	3	2	3	10.5	30.708	33214000	26506000	13978000	15855000	40944000	24390000
A0A212D3M2	A0A212D3M2	tr|A0A212D3M2|A0A212D3M2_CEREH C1QA OS=Cervus elaphus hippelaphus OX=46360 GN=Celaphus_00014757 PE=4 SV=1	1	2	2	2	8.6	26.159					35993000	13759000
A0A212D3U8	A0A212D3U8;A0A212D3Q5	tr|A0A212D3U8|A0A212D3U8_CEREH Uncharacterized protein OS=Cervus elaphus hippelaphus OX=46360 GN=Celaphus_00014826 PE=4 SV=1;tr|A0A212D3Q5|A0A212D3Q5_CEREH HMGN2 OS=Cervus elaphus hippelaphus OX=46360 GN=Celaphus_00014699 PE=4 SV=1	2	1	1	1	14.1	7.088	404500000	213090000	233860000	112180000	72924000	82871000
A0A212D3R3	A0A212D3R3	tr|A0A212D3R3|A0A212D3R3_CEREH Alkaline phosphatase OS=Cervus elaphus hippelaphus OX=46360 GN=Celaphus_00014740 PE=3 SV=1	1	14	14	14	38.4	57.3	1113700000	630130000	714920000	804070000	878020000	901550000
A0A212D3T1	A0A212D3T1	tr|A0A212D3T1|A0A212D3T1_CEREH IDH1 (Fragment) OS=Cervus elaphus hippelaphus OX=46360 GN=Celaphus_00015102 PE=4 SV=1	1	3	2	2	25	16.436		23123000	37085000
A0A212D3U9	A0A212D3U9	tr|A0A212D3U9|A0A212D3U9_CEREH KHDRBS1 OS=Cervus elaphus hippelaphus OX=46360 GN=Celaphus_00014900 PE=4 SV=1	1	1	1	1	3.1	49.166			8624900
A0A212D3W3	A0A212D3W3	tr|A0A212D3W3|A0A212D3W3_CEREH FN1 OS=Cervus elaphus hippelaphus OX=46360 GN=Celaphus_00015077 PE=4 SV=1	1	69	69	69	38	282.2	3742100000	3326900000	3508100000	3320200000	3705500000	3234300000
A0A212D3W4	A0A212D3W4	tr|A0A212D3W4|A0A212D3W4_CEREH MFAP2 OS=Cervus elaphus hippelaphus OX=46360 GN=Celaphus_00014679 PE=4 SV=1	1	1	1	1	10.4	20.641
A0A212D3X6	A0A212D3X6	tr|A0A212D3X6|A0A212D3X6_CEREH PTMA OS=Cervus elaphus hippelaphus OX=46360 GN=Celaphus_00014950 PE=4 SV=1	1	1	1	1	12.6	12.201		12587000	27237000
A0A212D400	A0A212D400	tr|A0A212D400|A0A212D400_CEREH IDH1 (Fragment) OS=Cervus elaphus hippelaphus OX=46360 GN=Celaphus_00015103 PE=4 SV=1	1	4	4	4	28.9	21.94			13849000		15256000	29707000
A0A212D426	A0A212D426;A0A212CNZ4;A0A212CMV0	tr|A0A212D426|A0A212D426_CEREH DES OS=Cervus elaphus hippelaphus OX=46360 GN=Celaphus_00015012 PE=3 SV=1	3	6	2	3	9.4	55.18	690480000	915330000	845660000	641020000	355310000	635460000
A0A212D451	A0A212D451	tr|A0A212D451|A0A212D451_CEREH CAB39 OS=Cervus elaphus hippelaphus OX=46360 GN=Celaphus_00014958 PE=4 SV=1	1	1	1	1	3.3	38.968	11691000	7296700			4809200	4940600
A0A212D452	A0A212D452	tr|A0A212D452|A0A212D452_CEREH Dolichyl-diphosphooligosaccharide--protein glycosyltransferase 48 kDa subunit OS=Cervus elaphus hippelaphus OX=46360 GN=Celaphus_00014726 PE=3 SV=1	1	9	9	9	33.3	48.819	558630000	117080000	127140000	74978000	49780000	43521000
A0A212D454	A0A212D454	tr|A0A212D454|A0A212D454_CEREH Arp2/3 complex 34 kDa subunit OS=Cervus elaphus hippelaphus OX=46360 GN=Celaphus_00015045 PE=3 SV=1	1	9	9	9	35.2	35.266		129720000	119970000	89023000	39387000	66765000
A0A212D458	A0A212D458	tr|A0A212D458|A0A212D458_CEREH SERPINB1 OS=Cervus elaphus hippelaphus OX=46360 GN=Celaphus_00014651 PE=3 SV=1	1	3	3	3	19.2	19.999		26666000		14785000	25486000	28895000
A0A212D467	A0A212D467	tr|A0A212D467|A0A212D467_CEREH C1QB OS=Cervus elaphus hippelaphus OX=46360 GN=Celaphus_00014759 PE=4 SV=1	1	1	1	1	6	26.503			31754000
A0A212D477	A0A212D477	tr|A0A212D477|A0A212D477_CEREH Uncharacterized protein OS=Cervus elaphus hippelaphus OX=46360 GN=Celaphus_00014537 PE=3 SV=1	1	7	0	3	26.4	27.935	477030000	4139300000	1412400000	657660000		57006000
A0A212D489	A0A212D489	tr|A0A212D489|A0A212D489_CEREH RHAG OS=Cervus elaphus hippelaphus OX=46360 GN=Celaphus_00014387 PE=3 SV=1	1	1	1	1	6.4	45.778		2534600	4512100	2893900
Q860J6	Q860J6;A0A212D4B5	tr|Q860J6|Q860J6_CEREL MHC class I antigen (Fragment) OS=Cervus elaphus OX=9860 PE=2 SV=1;tr|A0A212D4B5|A0A212D4B5_CEREH BOLA OS=Cervus elaphus hippelaphus OX=46360 GN=Celaphus_00014466 PE=4 SV=1	2	1	1	1	15.3	17.126
A0A212D4C1	A0A212D4C1	tr|A0A212D4C1|A0A212D4C1_CEREH Uncharacterized protein (Fragment) OS=Cervus elaphus hippelaphus OX=46360 GN=Celaphus_00014355 PE=4 SV=1	1	7	7	7	11.7	94.358	105620000	160090000	188000000	101500000	121740000	170040000
A0A212D4C7	A0A212D4C7;A0A212D2H9;A0A212C8R9	tr|A0A212D4C7|A0A212D4C7_CEREH Ribosomal protein OS=Cervus elaphus hippelaphus OX=46360 GN=Celaphus_00014228 PE=3 SV=1	3	6	6	6	33.2	24.831	31533000	138720000	180560000	88869000	60304000	126680000
A0A212D4H4	A0A212D4H4	tr|A0A212D4H4|A0A212D4H4_CEREH Uncharacterized protein OS=Cervus elaphus hippelaphus OX=46360 GN=Celaphus_00014503 PE=4 SV=1	1	1	1	1	1.8	62.827	48761000
A0A212D4H7	A0A212D4H7	tr|A0A212D4H7|A0A212D4H7_CEREH SSR1 (Fragment) OS=Cervus elaphus hippelaphus OX=46360 GN=Celaphus_00014630 PE=4 SV=1	1	4	4	4	20.6	27.797	223120000	176780000	127470000	307060000	120160000	154960000
A0A212D4K0	A0A212D4K0	tr|A0A212D4K0|A0A212D4K0_CEREH Histone H4 OS=Cervus elaphus hippelaphus OX=46360 GN=Celaphus_00014536 PE=3 SV=1	1	10	1	1	36.7	19.653	1529200000	1073500000	1044600000	1356000000		1356900000
A0A212D4L7	A0A212D4L7	tr|A0A212D4L7|A0A212D4L7_CEREH TXNDC5 OS=Cervus elaphus hippelaphus OX=46360 GN=Celaphus_00014625 PE=4 SV=1	1	3	3	3	18.5	28.651		256780000	248800000	166010000	275910000	201800000
A0A212D4M8	A0A212D4M8	tr|A0A212D4M8|A0A212D4M8_CEREH Uncharacterized protein OS=Cervus elaphus hippelaphus OX=46360 GN=Celaphus_00014441 PE=3 SV=1	1	1	1	1	0.8	224.26
A0A212D4Q1	A0A212D4Q1	tr|A0A212D4Q1|A0A212D4Q1_CEREH RPS10 OS=Cervus elaphus hippelaphus OX=46360 GN=Celaphus_00014211 PE=4 SV=1	1	2	2	2	21.2	13.198	111570000	294190000	141040000	219150000	137710000	202370000
A0A212D4S2	A0A212D4S2	tr|A0A212D4S2|A0A212D4S2_CEREH F13A1 OS=Cervus elaphus hippelaphus OX=46360 GN=Celaphus_00014633 PE=4 SV=1	1	1	1	1	3.4	51.93	36464000
A0A212D4S9	A0A212D4S9	tr|A0A212D4S9|A0A212D4S9_CEREH HSP90AB1 OS=Cervus elaphus hippelaphus OX=46360 GN=Celaphus_00014353 PE=4 SV=1	1	4	3	4	13.1	37.614	69728000	146600000	104960000	85170000	179780000	139540000
A0A212D4U0	A0A212D4U0	tr|A0A212D4U0|A0A212D4U0_CEREH Uncharacterized protein OS=Cervus elaphus hippelaphus OX=46360 GN=Celaphus_00014274 PE=4 SV=1	1	4	4	4	26.8	17.115			26178000		41044000	44365000
A0A212D4U4	A0A212D4U4;A0A212CAV8;CON__ENSEMBL:ENSBTAP00000025008	tr|A0A212D4U4|A0A212D4U4_CEREH Tubulin beta chain OS=Cervus elaphus hippelaphus OX=46360 GN=Celaphus_00014643 PE=3 SV=1	3	13	1	4	48.8	41.924	212360000	510800000	708300000	323560000	433480000	423940000
A0A212D4V2	A0A212D4V2	tr|A0A212D4V2|A0A212D4V2_CEREH Uncharacterized protein (Fragment) OS=Cervus elaphus hippelaphus OX=46360 GN=Celaphus_00014266 PE=4 SV=1	1	3	1	1	7.6	45.25
A0A212D4W6	A0A212D4W6;A0A212D524;A0A212D270	tr|A0A212D4W6|A0A212D4W6_CEREH Histone H2A (Fragment) OS=Cervus elaphus hippelaphus OX=46360 GN=Celaphus_00014539 PE=3 SV=1;tr|A0A212D524|A0A212D524_CEREH Histone H2A OS=Cervus elaphus hippelaphus OX=46360 GN=Celaphus_00014540 PE=3 SV=1;tr|A0A212D270|A0A21	3	6	2	3	49.4	19.401	10342000000	4942300000	4493300000	5013700000	6840400000	7170700000
A0A212D510	A0A212D510	tr|A0A212D510|A0A212D510_CEREH Uncharacterized protein (Fragment) OS=Cervus elaphus hippelaphus OX=46360 GN=Celaphus_00014182 PE=4 SV=1	1	2	2	2	0.4	422.4		87478000	71182000	77334000	124910000	164680000
A0A212D552	A0A212D552	tr|A0A212D552|A0A212D552_CEREH ABCF1 OS=Cervus elaphus hippelaphus OX=46360 GN=Celaphus_00014488 PE=4 SV=1	1	1	1	1	1.9	87.707	104180000	54735000	99746000	30775000	28120000	41291000
A0A212D556	A0A212D556	tr|A0A212D556|A0A212D556_CEREH CLIC1 (Fragment) OS=Cervus elaphus hippelaphus OX=46360 GN=Celaphus_00014444 PE=4 SV=1	1	7	7	7	25.1	39.972	60475000	43107000	24714000		89363000	42435000
A0A212D574	A0A212D574	tr|A0A212D574|A0A212D574_CEREH DDX39B (Fragment) OS=Cervus elaphus hippelaphus OX=46360 GN=Celaphus_00014463 PE=4 SV=1	1	2	1	1	20.4	18.994		11268000	12643000
A0A212D5B8	A0A212D5B8	tr|A0A212D5B8|A0A212D5B8_CEREH U6 snRNA-associated Sm-like protein LSm2 OS=Cervus elaphus hippelaphus OX=46360 GN=Celaphus_00014440 PE=3 SV=1	1	1	1	1	20	10.834	24843000	7624000		14508000		12398000
A0A212D5E3	A0A212D5E3	tr|A0A212D5E3|A0A212D5E3_CEREH APOM OS=Cervus elaphus hippelaphus OX=46360 GN=Celaphus_00014452 PE=4 SV=1	1	1	1	1	6.9	21.277
A0A212D5H4	A0A212D5H4	tr|A0A212D5H4|A0A212D5H4_CEREH Uncharacterized protein (Fragment) OS=Cervus elaphus hippelaphus OX=46360 GN=Celaphus_00014479 PE=3 SV=1	1	5	2	2	77.2	13.946		61162000	119030000	44794000	80198000	57653000
A0A212D5M7	A0A212D5M7	tr|A0A212D5M7|A0A212D5M7_CEREH PSAPL1 OS=Cervus elaphus hippelaphus OX=46360 GN=Celaphus_00017204 PE=4 SV=1	1	2	2	2	4.5	57.473	71708000	37802000	46399000		24674000	26170000
A0A212D5P0	A0A212D5P0	tr|A0A212D5P0|A0A212D5P0_CEREH ALB OS=Cervus elaphus hippelaphus OX=46360 GN=Celaphus_00017423 PE=3 SV=1	1	62	12	62	83	69.081	205240000000	274960000000	259200000000	380150000000	352320000000	332560000000
A0A212D5P4	A0A212D5P4;A0A212CR82	tr|A0A212D5P4|A0A212D5P4_CEREH Uncharacterized protein OS=Cervus elaphus hippelaphus OX=46360 GN=Celaphus_00014534 PE=3 SV=1	2	13	3	13	38.5	31.301	17665000000	17763000000	21506000000	18840000000	20132000000	17867000000
A0A212D5R7	A0A212D5R7	tr|A0A212D5R7|A0A212D5R7_CEREH JCHAIN OS=Cervus elaphus hippelaphus OX=46360 GN=Celaphus_00017405 PE=4 SV=1	1	6	6	6	40.5	18.058	302860000	209600000	136310000	98785000	94428000	103510000
A0A212D5V3	A0A212D5V3	tr|A0A212D5V3|A0A212D5V3_CEREH PAICS OS=Cervus elaphus hippelaphus OX=46360 GN=Celaphus_00017485 PE=3 SV=1	1	1	1	1	3.6	45.32
A0A212D5Y7	A0A212D5Y7	tr|A0A212D5Y7|A0A212D5Y7_CEREH Uncharacterized protein OS=Cervus elaphus hippelaphus OX=46360 GN=Celaphus_00017414 PE=4 SV=1	1	2	2	2	4.5	61.808		44018000	36045000
A0A212D624	A0A212D624	tr|A0A212D624|A0A212D624_CEREH ANXA3 (Fragment) OS=Cervus elaphus hippelaphus OX=46360 GN=Celaphus_00017355 PE=4 SV=1	1	1	1	1	13.2	7.5908	14995000
A0A212D631	A0A212D631;A0A212BZH3;A0A212D2T7	tr|A0A212D631|A0A212D631_CEREH SEPT11 (Fragment) OS=Cervus elaphus hippelaphus OX=46360 GN=Celaphus_00017370 PE=3 SV=1;tr|A0A212BZH3|A0A212BZH3_CEREH SEPT6 (Fragment) OS=Cervus elaphus hippelaphus OX=46360 GN=Celaphus_00009475 PE=3 SV=1;tr|A0A212D2T7|A0A21	3	2	2	2	14.3	15.523			1568500000	2247800000
A0A212D657	A0A212D657	tr|A0A212D657|A0A212D657_CEREH SEC31A (Fragment) OS=Cervus elaphus hippelaphus OX=46360 GN=Celaphus_00017341 PE=4 SV=1	1	4	4	4	3.7	113.32	72267000	36890000	18424000	23925000	31479000	30243000
A0A212D6B1	A0A212D6B1	tr|A0A212D6B1|A0A212D6B1_CEREH Uncharacterized protein (Fragment) OS=Cervus elaphus hippelaphus OX=46360 GN=Celaphus_00017337 PE=4 SV=1	1	1	1	1	12.3	18.246
A0A212D6D8	A0A212D6D8	tr|A0A212D6D8|A0A212D6D8_CEREH SEC31A (Fragment) OS=Cervus elaphus hippelaphus OX=46360 GN=Celaphus_00017342 PE=4 SV=1	1	2	2	2	13.2	14.848	47706000	66777000	54587000		76173000	51821000
A0A212D6I7	A0A212D6I7;A0A212CLY9	tr|A0A212D6I7|A0A212D6I7_CEREH YWHAE (Fragment) OS=Cervus elaphus hippelaphus OX=46360 GN=Celaphus_00000823 PE=3 SV=1	2	8	6	8	53.2	21.145	1978400000	1056700000	1017400000	1456800000	1514600000	1355100000
A0A212D6Q4	A0A212D6Q4	tr|A0A212D6Q4|A0A212D6Q4_CEREH Dynein light chain OS=Cervus elaphus hippelaphus OX=46360 GN=Celaphus_00000236 PE=3 SV=1	1	1	1	1	12.4	10.366			29964000			23151000
A0A212D6R3	A0A212D6R3	tr|A0A212D6R3|A0A212D6R3_CEREH KRT10 (Fragment) OS=Cervus elaphus hippelaphus OX=46360 GN=Celaphus_00001296 PE=3 SV=1	1	26	12	24	57.3	58.715	2346100000	2707400000	3228600000	1807600000	1464900000	1736800000
A0A212D6W5	A0A212D6W5	tr|A0A212D6W5|A0A212D6W5_CEREH AP complex subunit beta OS=Cervus elaphus hippelaphus OX=46360 GN=Celaphus_00000150 PE=3 SV=1	1	2	2	2	3.6	103.65	24561000				10169000	8899100
A0A212D6Y9	A0A212D6Y9	tr|A0A212D6Y9|A0A212D6Y9_CEREH Uncharacterized protein OS=Cervus elaphus hippelaphus OX=46360 GN=Celaphus_00017347 PE=4 SV=1	1	6	6	6	27.6	29.282	27536000	74859000	80410000	41108000	69003000	51154000
A0A212D6Z1	A0A212D6Z1	tr|A0A212D6Z1|A0A212D6Z1_CEREH Nucleoside diphosphate kinase OS=Cervus elaphus hippelaphus OX=46360 GN=Celaphus_00001124 PE=3 SV=1	1	15	15	15	62.5	39.453	1436100000	1053900000	958240000	1280000000	1192400000	1251100000
A0A212D702	A0A212D702;A0A212CRQ6	tr|A0A212D702|A0A212D702_CEREH Pyrroline-5-carboxylate reductase OS=Cervus elaphus hippelaphus OX=46360 GN=Celaphus_00001501 PE=3 SV=1	2	6	6	6	27.8	33.386	31626000	94068000	66943000	60630000	57689000	35569000
A0A212D717	A0A212D717	tr|A0A212D717|A0A212D717_CEREH Uncharacterized protein (Fragment) OS=Cervus elaphus hippelaphus OX=46360 GN=Celaphus_00000033 PE=4 SV=1	1	1	1	1	6.3	13.596		22160000	28576000
A0A212D730	A0A212D730	tr|A0A212D730|A0A212D730_CEREH CLTC (Fragment) OS=Cervus elaphus hippelaphus OX=46360 GN=Celaphus_00000640 PE=4 SV=1	1	1	1	1	8.9	15.095
A0A212D765	A0A212D765;A0A212DAY2;A0A212D8V9;A0A212D9T7;A0A212D7H3	tr|A0A212D765|A0A212D765_CEREH Uncharacterized protein OS=Cervus elaphus hippelaphus OX=46360 GN=Celaphus_00001014 PE=3 SV=1	5	14	7	11	16.8	125.81	102620000	87765000	76296000			28219000
A0A212D767	A0A212D767	tr|A0A212D767|A0A212D767_CEREH ARPC3 OS=Cervus elaphus hippelaphus OX=46360 GN=Celaphus_00000333 PE=4 SV=1	1	2	2	2	23.1	12.162		23682000	33331000	31937000	34870000	25584000
A0A212D776	A0A212D776;A0A212CIB5	tr|A0A212D776|A0A212D776_CEREH Eukaryotic translation initiation factor 5A OS=Cervus elaphus hippelaphus OX=46360 GN=Celaphus_00000952 PE=3 SV=1;tr|A0A212CIB5|A0A212CIB5_CEREH Eukaryotic translation initiation factor 5A OS=Cervus elaphus hippelaphus OX=463	2	8	8	8	63	16.832	167410000	133410000	115620000	132020000	66501000	64522000
A0A212D780	A0A212D780	tr|A0A212D780|A0A212D780_CEREH Uncharacterized protein OS=Cervus elaphus hippelaphus OX=46360 GN=Celaphus_00001327 PE=4 SV=1	1	1	1	1	8	24.24		6907200	4993000	11018000	8013500	5219800
A0A212D793	A0A212D793;CON__ENSEMBL:ENSP00000377550;CON__P13646-1	tr|A0A212D793|A0A212D793_CEREH KRT19 OS=Cervus elaphus hippelaphus OX=46360 GN=Celaphus_00001320 PE=3 SV=1	3	15	2	6	16.1	123.89	366410000	252300000	225310000	251550000	266050000	268930000
A0A212D7B8	A0A212D7B8;A0A212D9B8;A0A212D6Q1	tr|A0A212D7B8|A0A212D7B8_CEREH Amine oxidase OS=Cervus elaphus hippelaphus OX=46360 GN=Celaphus_00001373 PE=3 SV=1	3	15	12	15	28.2	84.399	626880000	1456400000	1217700000	1764400000	1795800000	1741000000
A0A212D7G5	A0A212D7G5	tr|A0A212D7G5|A0A212D7G5_CEREH Uncharacterized protein (Fragment) OS=Cervus elaphus hippelaphus OX=46360 GN=Celaphus_00000096 PE=4 SV=1	1	7	5	5	68.8	11.426	743580000	422980000	1001700000	440220000	65931000
A0A212D7H2	A0A212D7H2	tr|A0A212D7H2|A0A212D7H2_CEREH Uncharacterized protein OS=Cervus elaphus hippelaphus OX=46360 GN=Celaphus_00000102 PE=3 SV=1	1	7	5	5	36.4	25.247	206760000	227060000	195890000	276120000	115430000	199220000
A0A212D7H8	A0A212D7H8	tr|A0A212D7H8|A0A212D7H8_CEREH ACADVL OS=Cervus elaphus hippelaphus OX=46360 GN=Celaphus_00000946 PE=4 SV=1	1	4	4	4	9.5	59.508		17134000	31448000	18713000	16566000	19359000
A0A212D7K8	A0A212D7K8	tr|A0A212D7K8|A0A212D7K8_CEREH LGALS3BP OS=Cervus elaphus hippelaphus OX=46360 GN=Celaphus_00001567 PE=4 SV=1	1	1	1	1	8.2	18.37
A0A212D7L3	A0A212D7L3	tr|A0A212D7L3|A0A212D7L3_CEREH Uncharacterized protein OS=Cervus elaphus hippelaphus OX=46360 GN=Celaphus_00001208 PE=4 SV=1	1	2	2	2	17.1	16.385		15326000	18567000	17536000	15363000	19203000
A0A212D7M1	A0A212D7M1	tr|A0A212D7M1|A0A212D7M1_CEREH KRT24 OS=Cervus elaphus hippelaphus OX=46360 GN=Celaphus_00001293 PE=3 SV=1	1	3	1	1	6.1	55.369					8512000
A0A212D7N4	A0A212D7N4	tr|A0A212D7N4|A0A212D7N4_CEREH Uncharacterized protein OS=Cervus elaphus hippelaphus OX=46360 GN=Celaphus_00001441 PE=3 SV=1	1	1	1	1	4.9	36.558		7497500		5717300
A0A212D7N7	A0A212D7N7	tr|A0A212D7N7|A0A212D7N7_CEREH COMT OS=Cervus elaphus hippelaphus OX=46360 GN=Celaphus_00000015 PE=4 SV=1	1	1	1	1	6.4	37.357			4809600
A0A212D7P1	A0A212D7P1	tr|A0A212D7P1|A0A212D7P1_CEREH ACLY OS=Cervus elaphus hippelaphus OX=46360 GN=Celaphus_00001332 PE=4 SV=1	1	1	1	1	1.4	116		8643300	10981000
A0A212D7P7	A0A212D7P7	tr|A0A212D7P7|A0A212D7P7_CEREH Uncharacterized protein (Fragment) OS=Cervus elaphus hippelaphus OX=46360 GN=Celaphus_00001543 PE=4 SV=1	1	3	3	3	12.6	29.706	8405100	12519000			16705000
A0A212D7P9	A0A212D7P9	tr|A0A212D7P9|A0A212D7P9_CEREH Uncharacterized protein OS=Cervus elaphus hippelaphus OX=46360 GN=Celaphus_00001495 PE=4 SV=1	1	2	1	1	14.5	20.708			11799000
A0A212D7S4	A0A212D7S4	tr|A0A212D7S4|A0A212D7S4_CEREH NPEPPS (Fragment) OS=Cervus elaphus hippelaphus OX=46360 GN=Celaphus_00001198 PE=4 SV=1	1	4	4	4	9.3	73.677	27731000	5792600	6584700		7217400	8494200
A0A212D7S6	A0A212D7S6	tr|A0A212D7S6|A0A212D7S6_CEREH MYH10 (Fragment) OS=Cervus elaphus hippelaphus OX=46360 GN=Celaphus_00001016 PE=3 SV=1	1	2	1	1	22.3	17.558			11787000
A0A212D7X4	A0A212D7X4	tr|A0A212D7X4|A0A212D7X4_CEREH Amine oxidase OS=Cervus elaphus hippelaphus OX=46360 GN=Celaphus_00001366 PE=3 SV=1	1	4	2	2	4.4	112.4	26030000	231290000	146470000	211260000	266740000	303440000
A0A212D7Z4	A0A212D7Z4	tr|A0A212D7Z4|A0A212D7Z4_CEREH PEBP1 OS=Cervus elaphus hippelaphus OX=46360 GN=Celaphus_00000305 PE=4 SV=1	1	6	3	3	39.1	25.029	48011000	67862000	69982000	72486000	69181000	48068000
A0A212D809	A0A212D809;A0A212CS49;A0A212CWN7;A0A212C6X0	tr|A0A212D809|A0A212D809_CEREH Uncharacterized protein OS=Cervus elaphus hippelaphus OX=46360 GN=Celaphus_00000768 PE=3 SV=1;tr|A0A212CS49|A0A212CS49_CEREH Uncharacterized protein OS=Cervus elaphus hippelaphus OX=46360 GN=Celaphus_00015231 PE=3 SV=1;tr|A0A	4	4	4	4	22.2	20.542	399980000	323400000	261390000	183460000	235210000	221490000
A0A212D820	A0A212D820	tr|A0A212D820|A0A212D820_CEREH Uncharacterized protein OS=Cervus elaphus hippelaphus OX=46360 GN=Celaphus_00001365 PE=4 SV=1	1	1	1	1	5.9	29.506
A0A212D850	A0A212D850	tr|A0A212D850|A0A212D850_CEREH EIF4A1 (Fragment) OS=Cervus elaphus hippelaphus OX=46360 GN=Celaphus_00000970 PE=4 SV=1	1	2	2	2	21.8	9.5038	88260000	32474000	30339000	29584000	62057000	36096000
A0A212D857	A0A212D857	tr|A0A212D857|A0A212D857_CEREH SLC25A11 OS=Cervus elaphus hippelaphus OX=46360 GN=Celaphus_00000915 PE=3 SV=1	1	2	2	2	6.7	34.187	26073000					10756000
A0A212D859	A0A212D859;A0A212CQ27	tr|A0A212D859|A0A212D859_CEREH 60S ribosomal protein L6 OS=Cervus elaphus hippelaphus OX=46360 GN=Celaphus_00000259 PE=3 SV=1	2	6	3	6	36.4	17.943	230260000	110750000	194980000	108710000	137050000	129670000
A0A212D8B2	A0A212D8B2;A0A212DAW2	tr|A0A212D8B2|A0A212D8B2_CEREH CRK OS=Cervus elaphus hippelaphus OX=46360 GN=Celaphus_00000824 PE=4 SV=1	2	4	4	4	16.4	33.83	54510000	26620000	26373000	22879000	27143000	27633000
A0A212D8C1	A0A212D8C1	tr|A0A212D8C1|A0A212D8C1_CEREH Cytochrome c oxidase subunit 6A, mitochondrial OS=Cervus elaphus hippelaphus OX=46360 GN=Celaphus_00000240 PE=3 SV=1	1	1	1	1	16.5	12.042		27947000	51212000
P61357	P61357;A0A212D8E0	sp|P61357|RL27_CERNI 60S ribosomal protein L27 OS=Cervus nippon OX=9863 GN=RPL27 PE=2 SV=2;tr|A0A212D8E0|A0A212D8E0_CEREH 60S ribosomal protein L27 OS=Cervus elaphus hippelaphus OX=46360 GN=Celaphus_00001379 PE=3 SV=1	2	5	5	5	42.6	15.798	79338000	188590000	144950000	72783000	72136000	103420000
A0A212D8H1	A0A212D8H1	tr|A0A212D8H1|A0A212D8H1_CEREH Integrin beta OS=Cervus elaphus hippelaphus OX=46360 GN=Celaphus_00001420 PE=3 SV=1	1	3	3	3	4.3	85.542		13144000
A0A212D8I0	A0A212D8I0	tr|A0A212D8I0|A0A212D8I0_CEREH NAGLU OS=Cervus elaphus hippelaphus OX=46360 GN=Celaphus_00001348 PE=4 SV=1	1	3	3	3	8.7	76.283		24363000	18264000	31412000	21291000	35680000
A0A212D8L4	A0A212D8L4	tr|A0A212D8L4|A0A212D8L4_CEREH Uncharacterized protein OS=Cervus elaphus hippelaphus OX=46360 GN=Celaphus_00001213 PE=4 SV=1	1	2	2	2	17.4	17.345		39894000	53735000
A0A212D8M7	A0A212D8M7	tr|A0A212D8M7|A0A212D8M7_CEREH APOH OS=Cervus elaphus hippelaphus OX=46360 GN=Celaphus_00001705 PE=4 SV=1	1	3	1	1	11.8	44.321		19291000	19376000	23062000
A0A212D8M8	A0A212D8M8	tr|A0A212D8M8|A0A212D8M8_CEREH VAT1 OS=Cervus elaphus hippelaphus OX=46360 GN=Celaphus_00001382 PE=4 SV=1	1	5	5	5	14.2	42.809	80540000	49746000	50000000	39963000	50210000	79427000
A0A212D8Q8	A0A212D8Q8	tr|A0A212D8Q8|A0A212D8Q8_CEREH ERP29 OS=Cervus elaphus hippelaphus OX=46360 GN=Celaphus_00000254 PE=4 SV=1	1	5	5	5	35.5	24.212	39773000	35276000	33222000	31208000	43817000	20535000
A0A212D8Q9	A0A212D8Q9	tr|A0A212D8Q9|A0A212D8Q9_CEREH PSMD3 OS=Cervus elaphus hippelaphus OX=46360 GN=Celaphus_00001277 PE=4 SV=1	1	1	1	1	2.7	62.28		4349200	6687500	2788400		4382700
A0A212D8R5	A0A212D8R5	tr|A0A212D8R5|A0A212D8R5_CEREH SERPIND1 OS=Cervus elaphus hippelaphus OX=46360 GN=Celaphus_00000057 PE=3 SV=1	1	11	5	11	28.4	55.245	328840000	245630000	248930000	334090000	279310000	327620000
A0A212D8T8	A0A212D8T8	tr|A0A212D8T8|A0A212D8T8_CEREH SLC25A1 OS=Cervus elaphus hippelaphus OX=46360 GN=Celaphus_00000031 PE=3 SV=1	1	1	1	1	5.5	23.856
A0A212D8U5	A0A212D8U5	tr|A0A212D8U5|A0A212D8U5_CEREH SERPINF1 (Fragment) OS=Cervus elaphus hippelaphus OX=46360 GN=Celaphus_00000839 PE=3 SV=1	1	14	8	14	51.5	37.069	3050600000	3112500000	3009700000	6210900000	8486800000	7147000000
A0A212D8V0	A0A212D8V0	tr|A0A212D8V0|A0A212D8V0_CEREH FGG OS=Cervus elaphus hippelaphus OX=46360 GN=Celaphus_00000578 PE=4 SV=1	1	20	20	20	53.2	48.583	2644400000	2102900000	2812100000	1342800000	1381900000	1471900000
A0A212D8X9	A0A212D8X9;A0A212CLY1	tr|A0A212D8X9|A0A212D8X9_CEREH Tubulin alpha chain (Fragment) OS=Cervus elaphus hippelaphus OX=46360 GN=Celaphus_00000049 PE=3 SV=1	2	9	1	4	28.3	44.594	238330000	170680000	192440000	90365000	104550000	90223000
A0A212D8Y9	A0A212D8Y9	tr|A0A212D8Y9|A0A212D8Y9_CEREH UQCR10 OS=Cervus elaphus hippelaphus OX=46360 GN=Celaphus_00000141 PE=4 SV=1	1	2	2	2	39.1	7.3914		22941000	17374000
A0A212D901	A0A212D901	tr|A0A212D901|A0A212D901_CEREH GSTT1 OS=Cervus elaphus hippelaphus OX=46360 GN=Celaphus_00000087 PE=3 SV=1	1	1	1	1	9.1	24.566		4616000
A0A212D925	A0A212D925	tr|A0A212D925|A0A212D925_CEREH Uncharacterized protein OS=Cervus elaphus hippelaphus OX=46360 GN=Celaphus_00001013 PE=4 SV=1	1	1	1	1	10.5	11.856		8104500	13640000
A0A212D931	A0A212D931;CON__Q3ZBS7	tr|A0A212D931|A0A212D931_CEREH VTN OS=Cervus elaphus hippelaphus OX=46360 GN=Celaphus_00000755 PE=4 SV=1	2	11	11	11	27.1	54.519	196820000	216990000	198490000	337360000	318760000	288530000
A0A212D947	A0A212D947	tr|A0A212D947|A0A212D947_CEREH NT5C OS=Cervus elaphus hippelaphus OX=46360 GN=Celaphus_00001645 PE=4 SV=1	1	1	1	1	10	20.918
A0A212D988	A0A212D988	tr|A0A212D988|A0A212D988_CEREH Uncharacterized protein OS=Cervus elaphus hippelaphus OX=46360 GN=Celaphus_00001587 PE=3 SV=1	1	4	4	4	13.4	37.512	35379000	17232000	23841000	25215000	47378000	28067000
A0A212D994	A0A212D994	tr|A0A212D994|A0A212D994_CEREH RAB5C OS=Cervus elaphus hippelaphus OX=46360 GN=Celaphus_00001339 PE=4 SV=1	1	6	5	6	34.3	23.482	44109000	66332000	123120000	57430000	40123000	44683000
A0A212D9C4	A0A212D9C4	tr|A0A212D9C4|A0A212D9C4_CEREH Anion exchange protein OS=Cervus elaphus hippelaphus OX=46360 GN=Celaphus_00001234 PE=3 SV=1	1	23	23	23	30.3	105.62	954120000	1713500000	1607900000	747400000	636430000	642020000
A0A212D9E5	A0A212D9E5	tr|A0A212D9E5|A0A212D9E5_CEREH Uncharacterized protein (Fragment) OS=Cervus elaphus hippelaphus OX=46360 GN=Celaphus_00001276 PE=4 SV=1	1	2	2	2	6	50.117		18387000	14083000			14570000
A0A212D9E9	A0A212D9E9	tr|A0A212D9E9|A0A212D9E9_CEREH SRSF1 OS=Cervus elaphus hippelaphus OX=46360 GN=Celaphus_00000616 PE=4 SV=1	1	1	1	1	7	22.325
A0A212D9F4	A0A212D9F4;A0A076N8K2	tr|A0A212D9F4|A0A212D9F4_CEREH RPLP0 (Fragment) OS=Cervus elaphus hippelaphus OX=46360 GN=Celaphus_00000246 PE=4 SV=1;tr|A0A076N8K2|A0A076N8K2_CEREL 60S acidic ribosomal protein P0 (Fragment) OS=Cervus elaphus hispanicus OX=141655 GN=RPLP0 PE=4 SV=1	2	5	5	5	46.6	14.261	155780000	132420000	137700000	153830000	163930000	126120000
A0A212D9F7	A0A212D9F7;A6YLM2;CON__Q862S4	tr|A0A212D9F7|A0A212D9F7_CEREH COL1A1 OS=Cervus elaphus hippelaphus OX=46360 GN=Celaphus_00001147 PE=4 SV=1;tr|A6YLM2|A6YLM2_CEREL Collagen type I alpha 1 (Fragment) OS=Cervus elaphus OX=9860 GN=COL1A1 PE=2 SV=1	3	12	12	12	10.9	149.42	1305100000	1736700000	2156500000	2614700000	2501500000	2814600000
A0A212D9H6	A0A212D9H6	tr|A0A212D9H6|A0A212D9H6_CEREH Uncharacterized protein (Fragment) OS=Cervus elaphus hippelaphus OX=46360 GN=Celaphus_00000695 PE=4 SV=1	1	2	2	2	9.2	57.215		7868800	13312000	7131600	9193600	11219000
A0A212D9I0	A0A212D9I0	tr|A0A212D9I0|A0A212D9I0_CEREH LRRC59 (Fragment) OS=Cervus elaphus hippelaphus OX=46360 GN=Celaphus_00001142 PE=4 SV=1	1	4	4	4	16.7	29.086	84673000	45670000	50209000	32270000	26454000	29693000
A0A212D9K1	A0A212D9K1	tr|A0A212D9K1|A0A212D9K1_CEREH Fructose-bisphosphate aldolase OS=Cervus elaphus hippelaphus OX=46360 GN=Celaphus_00000762 PE=3 SV=1	1	2	2	2	8.4	49.407	36709000	13469000	22434000	21374000	20976000	18562000
A0A212D9K3	A0A212D9K3	tr|A0A212D9K3|A0A212D9K3_CEREH CLIP1 OS=Cervus elaphus hippelaphus OX=46360 GN=Celaphus_00000360 PE=4 SV=1	1	2	2	2	1.4	142.99			62650000
A0A212D9M9	A0A212D9M9	tr|A0A212D9M9|A0A212D9M9_CEREH Uncharacterized protein OS=Cervus elaphus hippelaphus OX=46360 GN=Celaphus_00000721 PE=4 SV=1	1	1	1	1	2.9	46.972	19577000	7495200	9826300
A0A212D9Q0	A0A212D9Q0;A0A212D422;A0A212CVJ7	tr|A0A212D9Q0|A0A212D9Q0_CEREH Uncharacterized protein OS=Cervus elaphus hippelaphus OX=46360 GN=Celaphus_00000658 PE=3 SV=1	3	4	4	4	23.6	24.732	157250000	108880000	110330000	73683000	115480000	106110000
A0A212D9Q1	A0A212D9Q1	tr|A0A212D9Q1|A0A212D9Q1_CEREH Uncharacterized protein OS=Cervus elaphus hippelaphus OX=46360 GN=Celaphus_00001526 PE=3 SV=1	1	6	1	1	58	14.462	118930000	121410000	115130000	156310000	192530000	137020000
A0A212D9R7	A0A212D9R7	tr|A0A212D9R7|A0A212D9R7_CEREH Clathrin heavy chain OS=Cervus elaphus hippelaphus OX=46360 GN=Celaphus_00000641 PE=3 SV=1	1	18	18	18	16.8	157.72	130620000	160780000	181910000	66952000	65958000	75830000
A0A212D9W8	A0A212D9W8	tr|A0A212D9W8|A0A212D9W8_CEREH Uncharacterized protein (Fragment) OS=Cervus elaphus hippelaphus OX=46360 GN=Celaphus_00001232 PE=4 SV=1	1	1	1	1	1.5	62.159		9610500
A0A212D9X8	A0A212D9X8	tr|A0A212D9X8|A0A212D9X8_CEREH Phospholipase B-like OS=Cervus elaphus hippelaphus OX=46360 GN=Celaphus_00000277 PE=3 SV=1	1	1	1	1	3.6	52.843					7493400	8111200
A0A212DA10	A0A212DA10;A0A212CY73	tr|A0A212DA10|A0A212DA10_CEREH Uncharacterized protein (Fragment) OS=Cervus elaphus hippelaphus OX=46360 GN=Celaphus_00000552 PE=4 SV=1	2	5	5	5	30.8	18.48	142430000	95803000	183900000	92616000	122610000	115100000
A0A212DA16	A0A212DA16	tr|A0A212DA16|A0A212DA16_CEREH ATP5H (Fragment) OS=Cervus elaphus hippelaphus OX=46360 GN=Celaphus_00001650 PE=4 SV=1	1	4	4	4	32.8	21.08		111190000	83796000	62861000	51515000	40259000
A0A212DA24	A0A212DA24;CON__Q6IFX2;CON__P08779;CON__P19001;A0A212CQN9	tr|A0A212DA24|A0A212DA24_CEREH Uncharacterized protein (Fragment) OS=Cervus elaphus hippelaphus OX=46360 GN=Celaphus_00001321 PE=3 SV=1	5	30	7	30	25.8	122.56	2174900000	3002300000	2773100000	1189000000	1003500000	852970000
A0A212DA65	A0A212DA65	tr|A0A212DA65|A0A212DA65_CEREH ALDH2 OS=Cervus elaphus hippelaphus OX=46360 GN=Celaphus_00000250 PE=3 SV=1	1	5	5	5	14	57.502			24743000	57506000	55244000	31736000
A0A212DA91	A0A212DA91	tr|A0A212DA91|A0A212DA91_CEREH Uncharacterized protein (Fragment) OS=Cervus elaphus hippelaphus OX=46360 GN=Celaphus_00000244 PE=4 SV=1	1	1	1	1	25.8	7.1322						15207000
A0A212DA96	A0A212DA96	tr|A0A212DA96|A0A212DA96_CEREH CD68 (Fragment) OS=Cervus elaphus hippelaphus OX=46360 GN=Celaphus_00000971 PE=3 SV=1	1	1	1	1	11.9	11.789
A0A212DAA2	A0A212DAA2;CON__P02672	tr|A0A212DAA2|A0A212DAA2_CEREH FGA OS=Cervus elaphus hippelaphus OX=46360 GN=Celaphus_00000577 PE=4 SV=1	2	21	21	21	29.9	80.425	4232700000	3972600000	3579000000	3262300000	2690100000	3563600000
A0A212DAB8	A0A212DAB8	tr|A0A212DAB8|A0A212DAB8_CEREH USP22 (Fragment) OS=Cervus elaphus hippelaphus OX=46360 GN=Celaphus_00001115 PE=4 SV=1	1	1	1	1	6.5	39.464					8039700
A0A212DAD9	A0A212DAD9	tr|A0A212DAD9|A0A212DAD9_CEREH Proteasome subunit beta type OS=Cervus elaphus hippelaphus OX=46360 GN=Celaphus_00000921 PE=3 SV=1	1	3	3	3	23.8	25.461	75902000	31001000	50099000	31027000	31548000	62132000
A0A212DAJ8	A0A212DAJ8	tr|A0A212DAJ8|A0A212DAJ8_CEREH GLOD4 (Fragment) OS=Cervus elaphus hippelaphus OX=46360 GN=Celaphus_00000816 PE=4 SV=1	1	1	1	1	9.8	14.616					42013000
A0A212DAK5	A0A212DAK5	tr|A0A212DAK5|A0A212DAK5_CEREH Uncharacterized protein OS=Cervus elaphus hippelaphus OX=46360 GN=Celaphus_00000060 PE=3 SV=1	1	3	3	3	37.5	15.758		67362000	71134000	68679000	105140000	88801000
A0A212DAL5	A0A212DAL5	tr|A0A212DAL5|A0A212DAL5_CEREH Peptidylprolyl isomerase (Fragment) OS=Cervus elaphus hippelaphus OX=46360 GN=Celaphus_00001328 PE=4 SV=1	1	12	12	12	32.4	56.132	348660000	301300000	296800000	326880000	355420000	298440000
A0A212DAL6	A0A212DAL6	tr|A0A212DAL6|A0A212DAL6_CEREH FASN OS=Cervus elaphus hippelaphus OX=46360 GN=Celaphus_00001490 PE=4 SV=1	1	6	6	6	5.5	207.58	40206000	38431000	36054000	17278000
A0A212DAL9	A0A212DAL9	tr|A0A212DAL9|A0A212DAL9_CEREH Amine oxidase OS=Cervus elaphus hippelaphus OX=46360 GN=Celaphus_00001367 PE=3 SV=1	1	2	1	1	7.5	23.607		13043000	14553000		36591000
A0A212DAR1	A0A212DAR1	tr|A0A212DAR1|A0A212DAR1_CEREH Uncharacterized protein OS=Cervus elaphus hippelaphus OX=46360 GN=Celaphus_00000081 PE=4 SV=1	1	3	3	3	32.5	13.367	119470000	48416000	48496000	29957000	57130000	44066000
A0A212DAT0	A0A212DAT0;A0A212C6I7	tr|A0A212DAT0|A0A212DAT0_CEREH Uncharacterized protein OS=Cervus elaphus hippelaphus OX=46360 GN=Celaphus_00001219 PE=4 SV=1	2	5	5	5	37.2	14.738		64039000	72674000		39701000	30645000
A0A212DAU4	A0A212DAU4	tr|A0A212DAU4|A0A212DAU4_CEREH PHB OS=Cervus elaphus hippelaphus OX=46360 GN=Celaphus_00001161 PE=4 SV=1	1	9	9	9	36.4	29.804		46008000	62911000		36932000	21959000
A0A212DAZ1	A0A212DAZ1	tr|A0A212DAZ1|A0A212DAZ1_CEREH CHAD OS=Cervus elaphus hippelaphus OX=46360 GN=Celaphus_00001141 PE=4 SV=1	1	12	12	12	48.8	40.808	786250000	639490000	595370000	1327300000	1171900000	1158400000
A0A212DB08	A0A212DB08	tr|A0A212DB08|A0A212DB08_CEREH Uncharacterized protein OS=Cervus elaphus hippelaphus OX=46360 GN=Celaphus_00001212 PE=3 SV=1	1	1	1	1	14.3	14.865	95695000	18731000	34797000	23184000	21340000	28760000
A0A212DB37	A0A212DB37	tr|A0A212DB37|A0A212DB37_CEREH Protein disulfide-isomerase (Fragment) OS=Cervus elaphus hippelaphus OX=46360 GN=Celaphus_00001510 PE=3 SV=1	1	22	22	22	61.7	51.486	1186900000	1304200000	1193700000	1140100000	1062200000	1011700000
A0A212DB49	A0A212DB49	tr|A0A212DB49|A0A212DB49_CEREH MRC2 OS=Cervus elaphus hippelaphus OX=46360 GN=Celaphus_00001426 PE=4 SV=1	1	8	8	8	15.9	95.682		106610000	130270000	94391000	71905000	59507000
A0A212DB51	A0A212DB51	tr|A0A212DB51|A0A212DB51_CEREH MPP2 (Fragment) OS=Cervus elaphus hippelaphus OX=46360 GN=Celaphus_00001249 PE=4 SV=1	1	1	1	1	3.5	32.32
A0A212DB59	A0A212DB59	tr|A0A212DB59|A0A212DB59_CEREH KPNB1 (Fragment) OS=Cervus elaphus hippelaphus OX=46360 GN=Celaphus_00001197 PE=4 SV=1	1	3	3	3	5.6	93.587	13534000	23249000	15816000	35080000	19600000	24295000
A0A212DB85	A0A212DB85	tr|A0A212DB85|A0A212DB85_CEREH ARHGDIA OS=Cervus elaphus hippelaphus OX=46360 GN=Celaphus_00001509 PE=4 SV=1	1	6	6	6	58	17.832	174880000	173680000	173360000	214230000	202590000	144740000
A0A212DB87	A0A212DB87	tr|A0A212DB87|A0A212DB87_CEREH LASP1 OS=Cervus elaphus hippelaphus OX=46360 GN=Celaphus_00001214 PE=4 SV=1	1	2	2	2	19.5	12.762		23013000	20237000
A0A212DB90	A0A212DB90	tr|A0A212DB90|A0A212DB90_CEREH Uncharacterized protein (Fragment) OS=Cervus elaphus hippelaphus OX=46360 GN=Celaphus_00000095 PE=4 SV=1	1	9	5	9	67.7	15.944	7551200000	15481000000	15983000000	9792400000	8609200000	12986000000
A0A212DB97	A0A212DB97;CON__P28800	tr|A0A212DB97|A0A212DB97_CEREH SERPINF2 OS=Cervus elaphus hippelaphus OX=46360 GN=Celaphus_00000838 PE=3 SV=1	2	14	14	14	36.6	54.53	895300000	437090000	399280000	421730000	432250000	480390000
A0A212DBA3	A0A212DBA3	tr|A0A212DBA3|A0A212DBA3_CEREH DDT OS=Cervus elaphus hippelaphus OX=46360 GN=Celaphus_00000086 PE=4 SV=1	1	2	2	2	7.7	21.101	34896000	42687000	59385000	38152000	34740000	43685000
A0A212DBC6	A0A212DBC6;A0A212C8C1;A0A212CT30	tr|A0A212DBC6|A0A212DBC6_CEREH Uncharacterized protein OS=Cervus elaphus hippelaphus OX=46360 GN=Celaphus_00001011 PE=4 SV=1;tr|A0A212C8C1|A0A212C8C1_CEREH RPL26L1 OS=Cervus elaphus hippelaphus OX=46360 GN=Celaphus_00017888 PE=3 SV=1	3	7	7	7	25	26.568	166040000	238160000	261490000	163830000	109410000	158510000
A0A212DBD4	A0A212DBD4	tr|A0A212DBD4|A0A212DBD4_CEREH RPL13A (Fragment) OS=Cervus elaphus hippelaphus OX=46360 GN=Celaphus_00004734 PE=3 SV=1	1	4	4	4	19.4	19.712		103600000	84711000	28957000
A0A212DBH8	A0A212DBH8	tr|A0A212DBH8|A0A212DBH8_CEREH Uncharacterized protein (Fragment) OS=Cervus elaphus hippelaphus OX=46360 GN=Celaphus_00004758 PE=3 SV=1	1	1	1	1	8	20.929		12197000
A0A212DBQ3	A0A212DBQ3;A0A212DE71	tr|A0A212DBQ3|A0A212DBQ3_CEREH RPS19 OS=Cervus elaphus hippelaphus OX=46360 GN=Celaphus_00004552 PE=4 SV=1	2	7	7	7	49.6	13.249	293890000	242590000	263530000	167870000	135210000	114770000
A0A212DBR8	A0A212DBR8	tr|A0A212DBR8|A0A212DBR8_CEREH SBSN (Fragment) OS=Cervus elaphus hippelaphus OX=46360 GN=Celaphus_00004513 PE=4 SV=1	1	6	6	6	33.6	54.614		192090000	208060000
A0A212DBZ3	A0A212DBZ3	tr|A0A212DBZ3|A0A212DBZ3_CEREH HSPB6 OS=Cervus elaphus hippelaphus OX=46360 GN=Celaphus_00004495 PE=3 SV=1	1	1	1	1	6.6	21.027		18318000	22532000
A0A212DC11	A0A212DC11	tr|A0A212DC11|A0A212DC11_CEREH KRTDAP OS=Cervus elaphus hippelaphus OX=46360 GN=Celaphus_00004515 PE=4 SV=1	1	1	1	1	11.1	10.848	15850000	10511000	12054000
A0A212DC86	A0A212DC86	tr|A0A212DC86|A0A212DC86_CEREH UQCRFS1 OS=Cervus elaphus hippelaphus OX=46360 GN=Celaphus_00003910 PE=4 SV=1	1	2	2	2	8.3	38.543		14308000	20038000	16440000
A0A212DC90	A0A212DC90	tr|A0A212DC90|A0A212DC90_CEREH Uncharacterized protein OS=Cervus elaphus hippelaphus OX=46360 GN=Celaphus_00004258 PE=4 SV=1	1	4	4	4	58.3	14.478		28548000	49358000	51829000	107390000	61274000
A0A212DCB6	A0A212DCB6	tr|A0A212DCB6|A0A212DCB6_CEREH NUCB1 OS=Cervus elaphus hippelaphus OX=46360 GN=Celaphus_00004706 PE=4 SV=1	1	14	14	14	42	53.226	111540000	276480000	179920000	75126000	137670000	119670000
A0A212DCD0	A0A212DCD0	tr|A0A212DCD0|A0A212DCD0_CEREH Uncharacterized protein OS=Cervus elaphus hippelaphus OX=46360 GN=Celaphus_00004639 PE=4 SV=1	1	8	1	1	51.9	15.342	445830000	412360000	485830000	27579000	307870000	465910000
A0A212DCE2	A0A212DCE2	tr|A0A212DCE2|A0A212DCE2_CEREH PPP2R1A (Fragment) OS=Cervus elaphus hippelaphus OX=46360 GN=Celaphus_00004817 PE=4 SV=1	1	6	6	6	16.1	59.414		43317000	48104000	43007000	50784000	47439000
A0A212DCG6	A0A212DCG6;A0A212DE47	tr|A0A212DCG6|A0A212DCG6_CEREH ACTN4 (Fragment) OS=Cervus elaphus hippelaphus OX=46360 GN=Celaphus_00004441 PE=4 SV=1	2	9	6	9	35.5	34.665	148400000	191260000	206540000	295360000	295370000	315280000
A0A212DCJ8	A0A212DCJ8	tr|A0A212DCJ8|A0A212DCJ8_CEREH BLVRB OS=Cervus elaphus hippelaphus OX=46360 GN=Celaphus_00004397 PE=4 SV=1	1	7	7	7	81.8	13.381	204700000	175250000	139550000	238130000	186230000	241300000
A0A212DCK7	A0A212DCK7	tr|A0A212DCK7|A0A212DCK7_CEREH CLEC11A OS=Cervus elaphus hippelaphus OX=46360 GN=Celaphus_00004776 PE=4 SV=1	1	1	1	1	3.7	35.753
A0A212DCN6	A0A212DCN6	tr|A0A212DCN6|A0A212DCN6_CEREH Uncharacterized protein (Fragment) OS=Cervus elaphus hippelaphus OX=46360 GN=Celaphus_00004920 PE=4 SV=1	1	1	1	1	4.3	35.948			757460000	383330000	25477000	33839000
A0A212DCN7	A0A212DCN7	tr|A0A212DCN7|A0A212DCN7_CEREH Uncharacterized protein OS=Cervus elaphus hippelaphus OX=46360 GN=Celaphus_00004237 PE=4 SV=1	1	4	2	4	16.7	30.793	90493000	66809000	76031000	51190000	45489000	80681000
A0A212DCQ0	A0A212DCQ0	tr|A0A212DCQ0|A0A212DCQ0_CEREH PSMC4 OS=Cervus elaphus hippelaphus OX=46360 GN=Celaphus_00004406 PE=3 SV=1	1	2	2	2	11.7	48.99		15877000	24576000	31439000	22886000	24541000
A0A212DCQ5	A0A212DCQ5;A0A212DDB5	tr|A0A212DCQ5|A0A212DCQ5_CEREH CAPNS1 OS=Cervus elaphus hippelaphus OX=46360 GN=Celaphus_00004477 PE=4 SV=1	2	3	3	3	23.8	17.315		31259000	27498000	34773000	32286000	38877000
A0A212DCS6	A0A212DCS6	tr|A0A212DCS6|A0A212DCS6_CEREH Uncharacterized protein OS=Cervus elaphus hippelaphus OX=46360 GN=Celaphus_00004869 PE=4 SV=1	1	2	2	2	27.8	8.8952	89250000	60297000	44735000	37306000	35289000	35810000
A0A212DCT4	A0A212DCT4	tr|A0A212DCT4|A0A212DCT4_CEREH Uncharacterized protein OS=Cervus elaphus hippelaphus OX=46360 GN=Celaphus_00004797 PE=4 SV=1	1	3	3	3	2.7	120.2		8993400
A0A212DCV8	A0A212DCV8	tr|A0A212DCV8|A0A212DCV8_CEREH Uncharacterized protein OS=Cervus elaphus hippelaphus OX=46360 GN=Celaphus_00004356 PE=4 SV=1	1	1	1	1	11.1	12.668				26165000
A0A212DCW5	A0A212DCW5	tr|A0A212DCW5|A0A212DCW5_CEREH PAFAH1B3 OS=Cervus elaphus hippelaphus OX=46360 GN=Celaphus_00004537 PE=4 SV=1	1	1	1	1	3.9	25.865	10973000
A0A212DD04	A0A212DD04	tr|A0A212DD04|A0A212DD04_CEREH A1BG OS=Cervus elaphus hippelaphus OX=46360 GN=Celaphus_00004945 PE=4 SV=1	1	19	13	19	52.2	56.989	1847500000	2151500000	2386300000	3100500000	3236400000	3082700000
A0A212DD20	A0A212DD20	tr|A0A212DD20|A0A212DD20_CEREH TUBB3 OS=Cervus elaphus hippelaphus OX=46360 GN=Celaphus_00004074 PE=3 SV=1	1	9	0	1	14.2	88.227	144050000	127320000	175310000	88525000	95471000	83985000
A0A212DD57	A0A212DD57	tr|A0A212DD57|A0A212DD57_CEREH APOE OS=Cervus elaphus hippelaphus OX=46360 GN=Celaphus_00004593 PE=4 SV=1	1	3	1	1	24.4	14.153	20056000	34337000	36011000	22141000		25628000
A0A212DD76	A0A212DD76	tr|A0A212DD76|A0A212DD76_CEREH Aspartate aminotransferase OS=Cervus elaphus hippelaphus OX=46360 GN=Celaphus_00004189 PE=4 SV=1	1	11	11	11	28.7	43.335	168700000	152040000	150900000	89742000	119000000	122080000
A0A212DD80	A0A212DD80	tr|A0A212DD80|A0A212DD80_CEREH Uncharacterized protein (Fragment) OS=Cervus elaphus hippelaphus OX=46360 GN=Celaphus_00004735 PE=3 SV=1	1	3	3	3	27.7	14.193	38377000	140930000	74053000	56313000	65582000	82409000
A0A212DD89	A0A212DD89	tr|A0A212DD89|A0A212DD89_CEREH APRT OS=Cervus elaphus hippelaphus OX=46360 GN=Celaphus_00004048 PE=3 SV=1	1	5	5	5	31.8	21.456	28651000	10735000	15937000	15577000	14780000	15178000
A0A212DD90	A0A212DD90	tr|A0A212DD90|A0A212DD90_CEREH AARS OS=Cervus elaphus hippelaphus OX=46360 GN=Celaphus_00003925 PE=4 SV=1	1	1	1	1	22.4	8.944				9038600		11151000
A0A212DDD7	A0A212DDD7	tr|A0A212DDD7|A0A212DDD7_CEREH VPS35 OS=Cervus elaphus hippelaphus OX=46360 GN=Celaphus_00004083 PE=4 SV=1	1	2	2	2	6.1	55.003			9491100
A0A212DDG4	A0A212DDG4	tr|A0A212DDG4|A0A212DDG4_CEREH CYB5B OS=Cervus elaphus hippelaphus OX=46360 GN=Celaphus_00004290 PE=3 SV=1	1	1	1	1	11.8	12.275				21563000	20076000	30181000
A0A212DDG9	A0A212DDG9	tr|A0A212DDG9|A0A212DDG9_CEREH ACTN4 OS=Cervus elaphus hippelaphus OX=46360 GN=Celaphus_00004440 PE=4 SV=1	1	12	10	10	26.8	66.988		212190000	232070000	269650000	252430000	240670000
A0A212DDH7	A0A212DDH7	tr|A0A212DDH7|A0A212DDH7_CEREH SNRPA OS=Cervus elaphus hippelaphus OX=46360 GN=Celaphus_00004383 PE=4 SV=1	1	1	1	1	4.5	25.172		16328000
A0A212DDI5	A0A212DDI5	tr|A0A212DDI5|A0A212DDI5_CEREH Uncharacterized protein OS=Cervus elaphus hippelaphus OX=46360 GN=Celaphus_00004414 PE=4 SV=1	1	4	4	4	36.2	10.631		46276000	41417000	89260000	46503000	91835000
A0A212DDJ5	A0A212DDJ5	tr|A0A212DDJ5|A0A212DDJ5_CEREH Uncharacterized protein OS=Cervus elaphus hippelaphus OX=46360 GN=Celaphus_00004437 PE=3 SV=1	1	3	3	3	4.3	99.458		22859000
A0A212DDL2	A0A212DDL2	tr|A0A212DDL2|A0A212DDL2_CEREH KARS OS=Cervus elaphus hippelaphus OX=46360 GN=Celaphus_00003951 PE=3 SV=1	1	2	2	2	3.1	65.496		9526400	17697000			10429000
A0A212DDR9	A0A212DDR9	tr|A0A212DDR9|A0A212DDR9_CEREH Uncharacterized protein OS=Cervus elaphus hippelaphus OX=46360 GN=Celaphus_00004275 PE=4 SV=1	1	2	2	2	4.1	71.312		12051000	13630000	24336000	25783000	41068000
A0A212DDS2	A0A212DDS2	tr|A0A212DDS2|A0A212DDS2_CEREH DHDH OS=Cervus elaphus hippelaphus OX=46360 GN=Celaphus_00004707 PE=4 SV=1	1	2	2	2	7.2	31.835	30674000
A0A212DDT9	A0A212DDT9	tr|A0A212DDT9|A0A212DDT9_CEREH Amino acid transporter OS=Cervus elaphus hippelaphus OX=46360 GN=Celaphus_00004645 PE=3 SV=1	1	1	1	1	2.1	53.64		7915300	5502800
A0A212DDV8	A0A212DDV8	tr|A0A212DDV8|A0A212DDV8_CEREH EIF3K OS=Cervus elaphus hippelaphus OX=46360 GN=Celaphus_00004442 PE=4 SV=1	1	1	1	1	18.6	9.9152		9353900				6995900
A0A212DDW9	A0A212DDW9	tr|A0A212DDW9|A0A212DDW9_CEREH RCN3 OS=Cervus elaphus hippelaphus OX=46360 GN=Celaphus_00004737 PE=4 SV=1	1	6	6	6	41.4	23.906	556990000	469930000	557170000	287240000	404480000	364380000
A0A212DDY0	A0A212DDY0	tr|A0A212DDY0|A0A212DDY0_CEREH Uncharacterized protein OS=Cervus elaphus hippelaphus OX=46360 GN=Celaphus_00004343 PE=3 SV=1	1	1	1	1	4.8	18.343		9529700
A0A212DDZ9	A0A212DDZ9;A0A212CGW7	tr|A0A212DDZ9|A0A212DDZ9_CEREH Uncharacterized protein OS=Cervus elaphus hippelaphus OX=46360 GN=Celaphus_00004894 PE=3 SV=1	2	8	8	8	22.4	32.698	194490000	161930000	150540000	102580000	95993000	111250000
A0A212DE23	A0A212DE23	tr|A0A212DE23|A0A212DE23_CEREH Peptidoglycan-recognition protein OS=Cervus elaphus hippelaphus OX=46360 GN=Celaphus_00004635 PE=3 SV=1	1	1	1	1	6.3	21.14	26179000
A0A212DE67	A0A212DE67;A0A212CE57	tr|A0A212DE67|A0A212DE67_CEREH 60S ribosomal protein L13 OS=Cervus elaphus hippelaphus OX=46360 GN=Celaphus_00004060 PE=3 SV=1;tr|A0A212CE57|A0A212CE57_CEREH 60S ribosomal protein L13 OS=Cervus elaphus hippelaphus OX=46360 GN=Celaphus_00016269 PE=3 SV=1	2	8	8	8	36.5	24.291	324920000	105410000	216790000	104100000	104510000	87083000
A0A212DE82	A0A212DE82	tr|A0A212DE82|A0A212DE82_CEREH Dipeptidase OS=Cervus elaphus hippelaphus OX=46360 GN=Celaphus_00004062 PE=3 SV=1	1	2	2	2	8	45.116
A0A212DEB6	A0A212DEB6	tr|A0A212DEB6|A0A212DEB6_CEREH IKZF4 OS=Cervus elaphus hippelaphus OX=46360 GN=Celaphus_00011729 PE=4 SV=1	1	1	1	1	1.3	76.354	27167000	42184000		21019000	23723000
A0A212DEB7	A0A212DEB7	tr|A0A212DEB7|A0A212DEB7_CEREH SLC25A3 OS=Cervus elaphus hippelaphus OX=46360 GN=Celaphus_00011771 PE=3 SV=1	1	2	2	2	15.6	14.764	55593000	29824000
A0A212DEC2	A0A212DEC2	tr|A0A212DEC2|A0A212DEC2_CEREH Citrate synthase (Fragment) OS=Cervus elaphus hippelaphus OX=46360 GN=Celaphus_00011714 PE=3 SV=1	1	6	6	6	20.4	46.769	56965000	27305000	29608000	23765000	33804000	38975000
A0A212DEC6	A0A212DEC6	tr|A0A212DEC6|A0A212DEC6_CEREH N-acetylglucosamine-6-sulfatase OS=Cervus elaphus hippelaphus OX=46360 GN=Celaphus_00011636 PE=3 SV=1	1	2	2	2	3.9	60.366		34229000	20315000	18982000
A0A212DEE4	A0A212DEE4	tr|A0A212DEE4|A0A212DEE4_CEREH Peptidylprolyl isomerase OS=Cervus elaphus hippelaphus OX=46360 GN=Celaphus_00011538 PE=4 SV=1	1	2	2	2	6.9	28.314	90468000	58996000	49176000		64226000	65434000
A0A212DEF0	A0A212DEF0	tr|A0A212DEF0|A0A212DEF0_CEREH COTL1 OS=Cervus elaphus hippelaphus OX=46360 GN=Celaphus_00004006 PE=4 SV=1	1	6	6	6	36.6	16.01	92425000	45971000	70800000	73286000	80131000	78186000
A0A212DEF6	A0A212DEF6;A0A212DHI4	tr|A0A212DEF6|A0A212DEF6_CEREH NAP1L1 (Fragment) OS=Cervus elaphus hippelaphus OX=46360 GN=Celaphus_00011315 PE=3 SV=1	2	3	3	3	14.6	25.896		11835000	19217000	12393000	9414600	7853500
A0A212DEJ4	A0A212DEJ4	tr|A0A212DEJ4|A0A212DEJ4_CEREH Uncharacterized protein OS=Cervus elaphus hippelaphus OX=46360 GN=Celaphus_00011722 PE=4 SV=1	1	8	8	8	52	17.089	288490000	342620000	351910000	325660000	353760000	355760000
A0A212DEN6	A0A212DEN6	tr|A0A212DEN6|A0A212DEN6_CEREH Uncharacterized protein OS=Cervus elaphus hippelaphus OX=46360 GN=Celaphus_00011770 PE=4 SV=1	1	1	1	1	7.4	19.692		9254100	14824000
A0A212DER9	A0A212DER9	tr|A0A212DER9|A0A212DER9_CEREH DCTN2 OS=Cervus elaphus hippelaphus OX=46360 GN=Celaphus_00011668 PE=4 SV=1	1	1	1	1	2.5	44.171			12661000	14520000
A0A212DEV2	A0A212DEV2	tr|A0A212DEV2|A0A212DEV2_CEREH HSP90B1 (Fragment) OS=Cervus elaphus hippelaphus OX=46360 GN=Celaphus_00011809 PE=4 SV=1	1	8	8	8	37.9	24.482	313180000	329410000	277020000	224940000	222470000	251010000
A0A212DEV3	A0A212DEV3	tr|A0A212DEV3|A0A212DEV3_CEREH TMEM263 OS=Cervus elaphus hippelaphus OX=46360 GN=Celaphus_00011825 PE=4 SV=1	1	3	3	3	38.8	11.721	50548000	20087000	36671000		23353000	23602000
A0A212DEY5	A0A212DEY5	tr|A0A212DEY5|A0A212DEY5_CEREH COL2A1 OS=Cervus elaphus hippelaphus OX=46360 GN=Celaphus_00011558 PE=4 SV=1	1	2	2	2	11.1	22.92		54472000	26959000
A0A212DEZ1	A0A212DEZ1	tr|A0A212DEZ1|A0A212DEZ1_CEREH Decorin (Fragment) OS=Cervus elaphus hippelaphus OX=46360 GN=Celaphus_00011368 PE=3 SV=1	1	9	2	2	40.8	27.565	229850000	115230000	137120000	302810000	222390000	336390000
A0A212DEZ2	A0A212DEZ2	tr|A0A212DEZ2|A0A212DEZ2_CEREH CCT2 OS=Cervus elaphus hippelaphus OX=46360 GN=Celaphus_00011603 PE=3 SV=1	1	6	6	6	15.4	56.554	25876000	16597000	15747000	35784000	32411000	19227000
A0A212DF15	A0A212DF15	tr|A0A212DF15|A0A212DF15_CEREH Uncharacterized protein OS=Cervus elaphus hippelaphus OX=46360 GN=Celaphus_00011752 PE=4 SV=1	1	1	1	1	3.4	30.063	51721000	29787000	42965000
A0A212DF16	A0A212DF16	tr|A0A212DF16|A0A212DF16_CEREH Uncharacterized protein OS=Cervus elaphus hippelaphus OX=46360 GN=Celaphus_00011447 PE=3 SV=1	1	31	6	31	59.1	62.895	1498100000	1409000000	1559200000	1278800000	1349700000	1258400000
A0A212DF35	A0A212DF35	tr|A0A212DF35|A0A212DF35_CEREH Uncharacterized protein OS=Cervus elaphus hippelaphus OX=46360 GN=Celaphus_00011819 PE=4 SV=1	1	22	22	22	53.7	49.161	1079400000	811020000	761240000	555210000	529350000	511310000
A0A212DF64	A0A212DF64	tr|A0A212DF64|A0A212DF64_CEREH Tetraspanin OS=Cervus elaphus hippelaphus OX=46360 GN=Celaphus_00011743 PE=3 SV=1	1	3	3	3	10.5	25.744	86738000	62522000	63357000	65377000	58892000	43318000
A0A212DF65	A0A212DF65;CON__Q14CN4-1;CON__Q6IME9	tr|A0A212DF65|A0A212DF65_CEREH KRT75 OS=Cervus elaphus hippelaphus OX=46360 GN=Celaphus_00011457 PE=3 SV=1	3	8	0	1	6.7	112.56		48881000	66328000
A0A212DF69	A0A212DF69	tr|A0A212DF69|A0A212DF69_CEREH Serine hydroxymethyltransferase OS=Cervus elaphus hippelaphus OX=46360 GN=Celaphus_00011679 PE=3 SV=1	1	3	3	3	7.1	55.689
A0A212DF80	A0A212DF80	tr|A0A212DF80|A0A212DF80_CEREH KRT5 OS=Cervus elaphus hippelaphus OX=46360 GN=Celaphus_00011453 PE=3 SV=1	1	30	1	27	48.7	62.553	2450800000	1459800000	1747100000	1083200000	1170800000	1040700000
A0A212DF99	A0A212DF99;A0A212DFQ8	tr|A0A212DF99|A0A212DF99_CEREH CAND1 (Fragment) OS=Cervus elaphus hippelaphus OX=46360 GN=Celaphus_00011624 PE=4 SV=1;tr|A0A212DFQ8|A0A212DFQ8_CEREH CAND1 (Fragment) OS=Cervus elaphus hippelaphus OX=46360 GN=Celaphus_00011625 PE=4 SV=1	2	8	8	8	15	91.33		23869000	33360000	27523000	26930000	26793000
A0A212DFB1	A0A212DFB1	tr|A0A212DFB1|A0A212DFB1_CEREH Uncharacterized protein OS=Cervus elaphus hippelaphus OX=46360 GN=Celaphus_00011425 PE=4 SV=1	1	1	1	1	3.6	56.4		3753700	3546000	8001000	12943000	6526700
A0A212DFB6	A0A212DFB6	tr|A0A212DFB6|A0A212DFB6_CEREH Uncharacterized protein OS=Cervus elaphus hippelaphus OX=46360 GN=Celaphus_00011444 PE=3 SV=1	1	3	1	1	6.2	43.423		38309000	17785000	37849000		25047000
A0A212DFC0	A0A212DFC0;CON__Q2KIH2	tr|A0A212DFC0|A0A212DFC0_CEREH Uncharacterized protein OS=Cervus elaphus hippelaphus OX=46360 GN=Celaphus_00011707 PE=4 SV=1	2	7	7	7	31.2	28.147		61556000	39379000	44984000	50385000	51512000
A0A212DFD0	A0A212DFD0;A0A212CIH1	tr|A0A212DFD0|A0A212DFD0_CEREH Uncharacterized protein OS=Cervus elaphus hippelaphus OX=46360 GN=Celaphus_00011420 PE=4 SV=1;tr|A0A212CIH1|A0A212CIH1_CEREH PCBP3 OS=Cervus elaphus hippelaphus OX=46360 GN=Celaphus_00012838 PE=4 SV=1	2	3	2	2	9	43.841	65565000	8065400	13956000
A0A212DFL6	A0A212DFL6;A0A212DFF1;A0A212DEG2;CON__Q7RTS7;CON__Q32MB2;CON__P19013;CON__Q8N1N4-2;CON__Q7RTT2	tr|A0A212DFL6|A0A212DFL6_CEREH Uncharacterized protein OS=Cervus elaphus hippelaphus OX=46360 GN=Celaphus_00011443 PE=3 SV=1	8	27	7	17	45.5	60.663	378360000	507660000	479360000	65669000	81096000	91204000
A0A212DFN1	A0A212DFN1	tr|A0A212DFN1|A0A212DFN1_CEREH ATP synthase subunit beta OS=Cervus elaphus hippelaphus OX=46360 GN=Celaphus_00011700 PE=3 SV=1	1	24	24	24	72	56.257	3027400000	3077800000	2997300000	2878100000	3093300000	2923000000
A0A212DFR3	A0A212DFR3	tr|A0A212DFR3|A0A212DFR3_CEREH PRPH OS=Cervus elaphus hippelaphus OX=46360 GN=Celaphus_00011526 PE=3 SV=1	1	4	1	1	5.9	58.031		46819000	58941000	40147000	36805000	40531000
A0A212DFV1	A0A212DFV1;A0A212CFZ7;A0A212D0G0	tr|A0A212DFV1|A0A212DFV1_CEREH RAB1B OS=Cervus elaphus hippelaphus OX=46360 GN=Celaphus_00013242 PE=4 SV=1	3	6	3	3	26.5	31.008	15496000	168830000	181720000	114470000	146290000	132090000
A0A212DFV3	A0A212DFV3	tr|A0A212DFV3|A0A212DFV3_CEREH CAPN1 (Fragment) OS=Cervus elaphus hippelaphus OX=46360 GN=Celaphus_00013288 PE=3 SV=1	1	2	2	2	11.6	22.551	25819000	7952300		15206000	14976000	18710000
A0A212DFY8	A0A212DFY8	tr|A0A212DFY8|A0A212DFY8_CEREH EEF1G OS=Cervus elaphus hippelaphus OX=46360 GN=Celaphus_00013388 PE=4 SV=1	1	14	14	14	43.4	50.429	203650000	283850000	216950000	356090000	269110000	248750000
A0A212DG66	A0A212DG66	tr|A0A212DG66|A0A212DG66_CEREH Uncharacterized protein OS=Cervus elaphus hippelaphus OX=46360 GN=Celaphus_00013389 PE=4 SV=1	1	15	15	15	11.1	356.83	46609000	136970000	220600000	42070000		38615000
A0A212DG84	A0A212DG84	tr|A0A212DG84|A0A212DG84_CEREH V-type proton ATPase subunit a OS=Cervus elaphus hippelaphus OX=46360 GN=Celaphus_00013174 PE=3 SV=1	1	1	1	1	1.9	88.94
A0A212DG85	A0A212DG85	tr|A0A212DG85|A0A212DG85_CEREH 40S ribosomal protein S30 OS=Cervus elaphus hippelaphus OX=46360 GN=Celaphus_00013292 PE=3 SV=1	1	1	1	1	7.5	14.386	58417000	48830000	53491000	23565000	41157000	44634000
A0A212DG97	A0A212DG97	tr|A0A212DG97|A0A212DG97_CEREH Serum amyloid A protein (Fragment) OS=Cervus elaphus hippelaphus OX=46360 GN=Celaphus_00013534 PE=3 SV=1	1	1	1	1	10.1	10.026
A0A212DGB9	A0A212DGB9;A0A212C031	tr|A0A212DGB9|A0A212DGB9_CEREH RPLP2 OS=Cervus elaphus hippelaphus OX=46360 GN=Celaphus_00013103 PE=3 SV=1	2	4	4	4	48.7	11.679	128410000	136950000	168870000	91898000	117420000	134640000
A0A212DGC2	A0A212DGC2	tr|A0A212DGC2|A0A212DGC2_CEREH Pannexin (Fragment) OS=Cervus elaphus hippelaphus OX=46360 GN=PANX PE=3 SV=1	1	2	2	2	11.4	38.135			17235000
A0A212DGC4	A0A212DGC4	tr|A0A212DGC4|A0A212DGC4_CEREH Uncharacterized protein OS=Cervus elaphus hippelaphus OX=46360 GN=Celaphus_00013541 PE=4 SV=1	1	1	1	1	8	12.513	34531000	25943000		40632000		32702000
A0A212DGD5	A0A212DGD5	tr|A0A212DGD5|A0A212DGD5_CEREH Ubiquitin thioesterase OS=Cervus elaphus hippelaphus OX=46360 GN=Celaphus_00013342 PE=3 SV=1	1	2	2	2	9.2	31.284		25257000	31755000	28522000	25020000	44691000
A0A212DGE5	A0A212DGE5	tr|A0A212DGE5|A0A212DGE5_CEREH Uncharacterized protein OS=Cervus elaphus hippelaphus OX=46360 GN=Celaphus_00013230 PE=4 SV=1	1	1	1	1	2.8	51.759		7732800	10324000	17373000	18237000	14154000
A0A212DGF4	A0A212DGF4	tr|A0A212DGF4|A0A212DGF4_CEREH CAPN1 (Fragment) OS=Cervus elaphus hippelaphus OX=46360 GN=Celaphus_00013289 PE=3 SV=1	1	2	2	2	22.6	13.73					16357000
A0A212DGI6	A0A212DGI6	tr|A0A212DGI6|A0A212DGI6_CEREH NDUFC2 OS=Cervus elaphus hippelaphus OX=46360 GN=Celaphus_00013570 PE=4 SV=1	1	1	1	1	7	18.38			9129800
A0A212DGI8	A0A212DGI8	tr|A0A212DGI8|A0A212DGI8_CEREH Uncharacterized protein OS=Cervus elaphus hippelaphus OX=46360 GN=Celaphus_00013606 PE=4 SV=1	1	4	4	4	8.5	82.635		28650000	62663000	34189000	49347000	63413000
A0A212DGJ0	A0A212DGJ0	tr|A0A212DGJ0|A0A212DGJ0_CEREH DDB1 OS=Cervus elaphus hippelaphus OX=46360 GN=Celaphus_00013416 PE=4 SV=1	1	2	2	2	1.5	122.85				4800000		12353000
A0A212DGK2	A0A212DGK2	tr|A0A212DGK2|A0A212DGK2_CEREH Cystatin OS=Cervus elaphus hippelaphus OX=46360 GN=Celaphus_00013251 PE=3 SV=1	1	3	3	3	40.3	13.402		30499000	24162000	23118000		28580000
A0A212DGM9	A0A212DGM9	tr|A0A212DGM9|A0A212DGM9_CEREH AP2A2 (Fragment) OS=Cervus elaphus hippelaphus OX=46360 GN=Celaphus_00013110 PE=4 SV=1	1	2	2	2	4.5	93.451		5405300
A0A212DGR6	A0A212DGR6	tr|A0A212DGR6|A0A212DGR6_CEREH ASRGL1 OS=Cervus elaphus hippelaphus OX=46360 GN=Celaphus_00013390 PE=4 SV=1	1	2	1	1	6.7	27.979		24042000
A0A212DGS9	A0A212DGS9	tr|A0A212DGS9|A0A212DGS9_CEREH CTTN (Fragment) OS=Cervus elaphus hippelaphus OX=46360 GN=Celaphus_00013144 PE=4 SV=1	1	1	1	1	2.6	58.577
A0A212DGT2	A0A212DGT2	tr|A0A212DGT2|A0A212DGT2_CEREH PRDX5 OS=Cervus elaphus hippelaphus OX=46360 GN=Celaphus_00013325 PE=4 SV=1	1	6	6	6	36.5	23.302	50695000	26942000	11462000	21097000	35393000	21897000
A0A212DGU4	A0A212DGU4	tr|A0A212DGU4|A0A212DGU4_CEREH BANF1 OS=Cervus elaphus hippelaphus OX=46360 GN=Celaphus_00013252 PE=4 SV=1	1	3	3	3	42.7	10.058	110070000	129410000	173210000	67446000		78092000
A0A212DGV4	A0A212DGV4;A0A212DGH7	tr|A0A212DGV4|A0A212DGV4_CEREH L-lactate dehydrogenase OS=Cervus elaphus hippelaphus OX=46360 GN=Celaphus_00013539 PE=4 SV=1	2	10	9	10	23.9	82.215	596280000	411690000	367470000	363770000	344960000	298280000
A0A212DGY4	A0A212DGY4	tr|A0A212DGY4|A0A212DGY4_CEREH Tetraspanin OS=Cervus elaphus hippelaphus OX=46360 GN=Celaphus_00013121 PE=3 SV=1	1	3	3	3	35.8	17.933	128350000	48913000	62273000	45551000	43412000	67365000
A0A212DGZ8	A0A212DGZ8	tr|A0A212DGZ8|A0A212DGZ8_CEREH CTSD OS=Cervus elaphus hippelaphus OX=46360 GN=Celaphus_00013113 PE=3 SV=1	1	5	5	5	39.6	14.843	105620000	55360000	66713000	93585000	40852000	82580000
A0A212DH40	A0A212DH40	tr|A0A212DH40|A0A212DH40_CEREH CFL1 OS=Cervus elaphus hippelaphus OX=46360 GN=Celaphus_00013263 PE=3 SV=1	1	8	7	8	49.3	15.139	308040000	480620000	360020000	422520000	382830000	431640000
A0A212DH65	A0A212DH65	tr|A0A212DH65|A0A212DH65_CEREH GANAB (Fragment) OS=Cervus elaphus hippelaphus OX=46360 GN=Celaphus_00013382 PE=3 SV=1	1	15	15	15	20.9	98.875	39442000	208900000	111920000	115560000	133330000	108720000
A0A212DH75	A0A212DH75	tr|A0A212DH75|A0A212DH75_CEREH Transaldolase OS=Cervus elaphus hippelaphus OX=46360 GN=Celaphus_00013098 PE=4 SV=1	1	4	4	4	18.2	35.381	102120000	54787000	68410000	53697000	47407000	66377000
A0A212DH88	A0A212DH88;A0A212DH08	tr|A0A212DH88|A0A212DH88_CEREH GSTP1 (Fragment) OS=Cervus elaphus hippelaphus OX=46360 GN=Celaphus_00013184 PE=4 SV=1	2	10	10	10	59.5	23.672	285590000	217030000	301520000	372960000	343470000	344120000
A0A212DHC1	A0A212DHC1	tr|A0A212DHC1|A0A212DHC1_CEREH Uncharacterized protein (Fragment) OS=Cervus elaphus hippelaphus OX=46360 GN=Celaphus_00009315 PE=4 SV=1	1	3	3	3	4.8	66.565		50154000	46923000		82421000	82917000
A0A212DHC6	A0A212DHC6	tr|A0A212DHC6|A0A212DHC6_CEREH Uncharacterized protein OS=Cervus elaphus hippelaphus OX=46360 GN=Celaphus_00013340 PE=4 SV=1	1	1	1	1	3	49.123	14860000	17445000
A0A212DHE5	A0A212DHE5	tr|A0A212DHE5|A0A212DHE5_CEREH PSMC3 OS=Cervus elaphus hippelaphus OX=46360 GN=Celaphus_00009380 PE=3 SV=1	1	1	1	1	3.6	46.914	7032600	9031500	7261500	11900000	7375200	6176200
A0A212DHF2	A0A212DHF2;Q1PHW1	tr|A0A212DHF2|A0A212DHF2_CEREH Transgelin (Fragment) OS=Cervus elaphus hippelaphus OX=46360 GN=Celaphus_00008951 PE=3 SV=1;tr|Q1PHW1|Q1PHW1_CEREL Transgelin (Fragment) OS=Cervus elaphus OX=9860 PE=2 SV=1	2	15	15	15	74.6	22.962	343340000	322470000	420990000	452300000	420140000	449640000
A0A212DHG5	A0A212DHG5	tr|A0A212DHG5|A0A212DHG5_CEREH Uncharacterized protein (Fragment) OS=Cervus elaphus hippelaphus OX=46360 GN=Celaphus_00009247 PE=4 SV=1	1	1	1	1	11.5	18.932			3435400
A0A212DHH5	A0A212DHH5	tr|A0A212DHH5|A0A212DHH5_CEREH RAB6A (Fragment) OS=Cervus elaphus hippelaphus OX=46360 GN=Celaphus_00009216 PE=4 SV=1	1	2	2	2	23.3	15.211	116140000	30873000	65723000	55914000	81218000	47010000
A0A212DHJ1	A0A212DHJ1	tr|A0A212DHJ1|A0A212DHJ1_CEREH NUCB2 OS=Cervus elaphus hippelaphus OX=46360 GN=Celaphus_00009047 PE=4 SV=1	1	2	2	2	14.5	29.294		10646000	12069000
A0A220IGB8	A0A220IGB8;A0A220IGA8;A0A220IGA6;A0A212DHK9;CON__Q3SX09;A0A212DIP1;A0A212DIR4	tr|A0A220IGB8|A0A220IGB8_CEREL Fetal beta-globin OS=Cervus elaphus OX=9860 PE=3 SV=1;tr|A0A220IGA8|A0A220IGA8_CEREL Fetal beta-globin OS=Cervus elaphus bactrianus OX=164931 PE=3 SV=1;tr|A0A220IGA6|A0A220IGA6_9CETA Fetal beta-globin OS=Cervus canadensis OX=	7	18	3	5	96.6	15.947	64114000	239980000	258520000	162440000	187180000	257760000
A0A212DHL9	A0A212DHL9	tr|A0A212DHL9|A0A212DHL9_CEREH API5 (Fragment) OS=Cervus elaphus hippelaphus OX=46360 GN=Celaphus_00009329 PE=4 SV=1	1	1	1	1	5.2	39.217
A0A212DHM5	A0A212DHM5	tr|A0A212DHM5|A0A212DHM5_CEREH Uncharacterized protein (Fragment) OS=Cervus elaphus hippelaphus OX=46360 GN=Celaphus_00008936 PE=4 SV=1	1	2	2	2	19.1	21.887
A0A212DHP9	A0A212DHP9;A0A212DI82	tr|A0A212DHP9|A0A212DHP9_CEREH APOA1 OS=Cervus elaphus hippelaphus OX=46360 GN=Celaphus_00008946 PE=3 SV=1	2	19	5	19	60	30.235	33736000000	26615000000	24905000000	18568000000	21080000000	20302000000
A0A212DHQ6	A0A212DHQ6;A0A212CEV9	tr|A0A212DHQ6|A0A212DHQ6_CEREH ATP5L OS=Cervus elaphus hippelaphus OX=46360 GN=Celaphus_00008973 PE=4 SV=1	2	3	3	3	29.9	15.352	75982000	33347000	35426000	30323000	23693000	30837000
A0A212DHR7	A0A212DHR7	tr|A0A212DHR7|A0A212DHR7_CEREH HBB (Fragment) OS=Cervus elaphus hippelaphus OX=46360 GN=Celaphus_00009165 PE=3 SV=1	1	1	1	1	9.9	9.2669						18106000
A0A212DHT1	A0A212DHT1	tr|A0A212DHT1|A0A212DHT1_CEREH MTCH2 (Fragment) OS=Cervus elaphus hippelaphus OX=46360 GN=Celaphus_00009388 PE=3 SV=1	1	1	1	1	10.2	15.307		3344800
A0A212DHT3	A0A212DHT3	tr|A0A212DHT3|A0A212DHT3_CEREH Uncharacterized protein OS=Cervus elaphus hippelaphus OX=46360 GN=Celaphus_00009250 PE=4 SV=1	1	1	1	1	3.5	39.389	21788000		17437000
A0A212DHV1	A0A212DHV1	tr|A0A212DHV1|A0A212DHV1_CEREH Proteasome subunit alpha type (Fragment) OS=Cervus elaphus hippelaphus OX=46360 GN=Celaphus_00009061 PE=3 SV=1	1	4	4	4	25.1	20.58			18445000		27145000
A0A212DHZ3	A0A212DHZ3	tr|A0A212DHZ3|A0A212DHZ3_CEREH HPX (Fragment) OS=Cervus elaphus hippelaphus OX=46360 GN=Celaphus_00009140 PE=4 SV=1	1	7	4	7	51.3	21.09	677550000	1181500000	1246800000	1567500000	2149000000	1952100000
A0A212DI04	A0A212DI04	tr|A0A212DI04|A0A212DI04_CEREH Eukaryotic translation initiation factor 3 subunit F OS=Cervus elaphus hippelaphus OX=46360 GN=EIF3F PE=3 SV=1	1	2	2	2	7.8	43.142		14539000	21353000
A0A212DI06	A0A212DI06	tr|A0A212DI06|A0A212DI06_CEREH THY1 OS=Cervus elaphus hippelaphus OX=46360 GN=Celaphus_00009008 PE=4 SV=1	1	3	3	3	21.7	17.978	224420000	109890000	107430000	78485000	88923000	99366000
A0A212DI14	A0A212DI14	tr|A0A212DI14|A0A212DI14_CEREH PAFAH1B2 OS=Cervus elaphus hippelaphus OX=46360 GN=Celaphus_00008949 PE=4 SV=1	1	2	2	2	14.4	25.569	24349000	10091000	11068000	14231000	9526400	9244300
A0A212DI17	A0A212DI17	tr|A0A212DI17|A0A212DI17_CEREH NDUFS3 OS=Cervus elaphus hippelaphus OX=46360 GN=Celaphus_00009386 PE=3 SV=1	1	6	6	6	31.1	30.177		50874000	34622000
A0A212DI41	A0A212DI41	tr|A0A212DI41|A0A212DI41_CEREH CRYAB OS=Cervus elaphus hippelaphus OX=46360 GN=Celaphus_00008904 PE=3 SV=1	1	2	2	2	11.4	20.067	57809000	65000000	69281000	61000000
A0A212DI42	A0A212DI42	tr|A0A212DI42|A0A212DI42_CEREH RCN1 OS=Cervus elaphus hippelaphus OX=46360 GN=Celaphus_00009284 PE=4 SV=1	1	5	5	5	26.3	20.556	101750000	52920000	71775000	40750000	27902000	47343000
A0A212DI67	A0A212DI67	tr|A0A212DI67|A0A212DI67_CEREH HBE4 OS=Cervus elaphus hippelaphus OX=46360 GN=Celaphus_00009164 PE=3 SV=1	1	2	1	1	15	16.498			37199000
A0A212DI80	A0A212DI80	tr|A0A212DI80|A0A212DI80_CEREH OLFML1 OS=Cervus elaphus hippelaphus OX=46360 GN=Celaphus_00009111 PE=4 SV=1	1	4	4	4	13.7	44.292	13657000			20869000	20453000	27091000
A0A212DIC4	A0A212DIC4	tr|A0A212DIC4|A0A212DIC4_CEREH Coatomer subunit delta (Fragment) OS=Cervus elaphus hippelaphus OX=46360 GN=Celaphus_00008979 PE=3 SV=1	1	4	4	4	15.5	30.278	95008000	79239000	76774000	83733000	120300000	93479000
A0A212DIE8	A0A212DIE8;A0A212CSX0	tr|A0A212DIE8|A0A212DIE8_CEREH RPS3 OS=Cervus elaphus hippelaphus OX=46360 GN=Celaphus_00009241 PE=3 SV=1	2	12	12	12	56.8	25.83	211920000	355620000	232270000	245820000	283130000	290420000
A0A212DIH4	A0A212DIH4	tr|A0A212DIH4|A0A212DIH4_CEREH COMMD9 OS=Cervus elaphus hippelaphus OX=46360 GN=Celaphus_00009322 PE=4 SV=1	1	1	1	1	13.1	21.767		6500500		6369500	8332300
A0A212DII4	A0A212DII4	tr|A0A212DII4|A0A212DII4_CEREH APOA4 OS=Cervus elaphus hippelaphus OX=46360 GN=Celaphus_00008943 PE=3 SV=1	1	12	7	12	57.2	29.83	2013800000	1877400000	2059600000	1799700000	2135100000	2196000000
A0A212DII7	A0A212DII7;A0A142EHU4	tr|A0A212DII7|A0A212DII7_CEREH MMP13 (Fragment) OS=Cervus elaphus hippelaphus OX=46360 GN=Celaphus_00008834 PE=3 SV=1	2	4	4	4	16	40.066			22688000
A0A212DIJ0	A0A212DIJ0;A0A212DH97	tr|A0A212DIJ0|A0A212DIJ0_CEREH CD59 (Fragment) OS=Cervus elaphus hippelaphus OX=46360 GN=Celaphus_00009297 PE=4 SV=1;tr|A0A212DH97|A0A212DH97_CEREH Uncharacterized protein OS=Cervus elaphus hippelaphus OX=46360 GN=Celaphus_00013202 PE=4 SV=1	2	2	2	2	33.8	8.4475				54253000	62924000	37602000
A0A212DIL1	A0A212DIL1	tr|A0A212DIL1|A0A212DIL1_CEREH Histone H2A OS=Cervus elaphus hippelaphus OX=46360 GN=Celaphus_00008994 PE=3 SV=1	1	5	1	1	52.4	15.128
A0A212DIN6	A0A212DIN6	tr|A0A212DIN6|A0A212DIN6_CEREH Coatomer subunit beta OS=Cervus elaphus hippelaphus OX=46360 GN=Celaphus_00009062 PE=4 SV=1	1	4	4	4	7.6	92.839	34344000	27152000	26762000	24443000	14796000	26297000
A0A212DIQ1	A0A212DIQ1	tr|A0A212DIQ1|A0A212DIQ1_CEREH HYOU1 OS=Cervus elaphus hippelaphus OX=46360 GN=Celaphus_00008991 PE=3 SV=1	1	3	3	3	4.4	111.48		13731000	9610900	12063000		14824000
A0A212DIR1	A0A212DIR1	tr|A0A212DIR1|A0A212DIR1_CEREH APOC3 OS=Cervus elaphus hippelaphus OX=46360 GN=Celaphus_00008944 PE=4 SV=1	1	1	1	1	13.8	9.2014	36172000	47414000	43038000	19273000	24568000	20010000
A0A212DJ00	A0A212DJ00	tr|A0A212DJ00|A0A212DJ00_CEREH REXO2 OS=Cervus elaphus hippelaphus OX=46360 GN=Celaphus_00008933 PE=3 SV=1	1	1	1	1	7.6	26.785		12601000	15840000	12234000	10116000	12774000
A0A212DJ03	A0A212DJ03	tr|A0A212DJ03|A0A212DJ03_CEREH LAMTOR1 OS=Cervus elaphus hippelaphus OX=46360 GN=Celaphus_00009195 PE=4 SV=1	1	1	1	1	8.1	17.697
A0A212DJ20	A0A212DJ20	tr|A0A212DJ20|A0A212DJ20_CEREH HPX (Fragment) OS=Cervus elaphus hippelaphus OX=46360 GN=Celaphus_00009139 PE=4 SV=1	1	3	1	1	50.7	7.9369	303640000	73190000	69900000	160980000	150870000	187840000
A0A212DJ37	A0A212DJ37	tr|A0A212DJ37|A0A212DJ37_CEREH Eukaryotic translation initiation factor 3 subunit M OS=Cervus elaphus hippelaphus OX=46360 GN=EIF3M PE=3 SV=1	1	2	2	2	9.2	38.748
A0A212DJ92	A0A212DJ92	tr|A0A212DJ92|A0A212DJ92_CEREH SWAP70 OS=Cervus elaphus hippelaphus OX=46360 GN=Celaphus_00009081 PE=4 SV=1	1	2	2	2	11.4	29.024					5852100
A0A220IGB1	A0A220IGB1;A0A220IG98;A0A220IG97;A0A212DIY7	tr|A0A220IGB1|A0A220IGB1_CEREL Adult beta-globin OS=Cervus elaphus OX=9860 PE=3 SV=1;tr|A0A220IG98|A0A220IG98_CEREL Adult beta-globin OS=Cervus elaphus bactrianus OX=164931 PE=3 SV=1;tr|A0A220IG97|A0A220IG97_CERNI Adult beta-globin OS=Cervus nippon OX=9863	4	17	8	8	95.9	15.939	48183000000	53934000000	35552000000	5744500000	2833500000	2493000000
A0A220IGA3	A0A220IGA3	tr|A0A220IGA3|A0A220IGA3_9CETA Adult beta-globin OS=Cervus canadensis OX=1574408 PE=3 SV=1	1	20	4	20	97.2	16.011	114340000000	118300000000	96567000000	250800000000	234190000000	211830000000
A6YLM1	A6YLM1;A0A212DCE3	tr|A6YLM1|A6YLM1_CEREL Brain creatine kinase (Fragment) OS=Cervus elaphus OX=9860 GN=CKB PE=2 SV=1	2	10	10	10	60.1	32.587	630110000	1354700000	1307200000	1865300000	1901400000	1922900000
A6YLM7	A6YLM7	tr|A6YLM7|A6YLM7_CEREL Peptidylprolyl isomerase (Fragment) OS=Cervus elaphus OX=9860 GN=FKBP2 PE=2 SV=1	1	1	1	1	9.1	14.362	16010000	21101000	21522000	35841000	24732000	36005000
A6YLN0	A6YLN0	tr|A6YLN0|A6YLN0_CEREL Osteoclast stimulating factor 1 (Fragment) OS=Cervus elaphus OX=9860 GN=OSTF1 PE=2 SV=1	1	2	2	2	20.1	20.389		7562300	11529000	8214300	7968300	7153800
B6D985	B6D985	sp|B6D985|HPT_CEREL Haptoglobin OS=Cervus elaphus OX=9860 GN=HP PE=2 SV=1	1	22	22	22	50.8	44.689	315540000	1499300000	957290000	13948000	40174000	22393000
C7EDP2	C7EDP2	tr|C7EDP2|C7EDP2_CEREL Heat shock 70kDa protein 5 isoform 2 OS=Cervus elaphus OX=9860 GN=HSPA5 PE=2 SV=1	1	23	0	2	41.4	72.422		132280000	163600000	96029000	109230000	151690000
E7D7Z1	E7D7Z1	tr|E7D7Z1|E7D7Z1_CERNI Decorin OS=Cervus nippon OX=9863 GN=DCN PE=2 SV=1	1	12	5	12	39.2	39.924	2914100000	2653800000	2553700000	5610600000	5485500000	4398800000
E7D7Z2	E7D7Z2;A0A212CLU0	tr|E7D7Z2|E7D7Z2_CERNI Osteopontin OS=Cervus nippon OX=9863 GN=OPN PE=2 SV=1;tr|A0A212CLU0|A0A212CLU0_CEREH SPP1 (Fragment) OS=Cervus elaphus hippelaphus OX=46360 GN=Celaphus_00018637 PE=4 SV=1	2	2	2	2	9	30.993		17629000	11105000
F8S313	F8S313	tr|F8S313|F8S313_CERNH Excision repair cross-complementing rodent repair deficiency complementation group 6-like protein OS=Cervus nippon hortulorum OX=92866 GN=ERCC6L PE=2 SV=1	1	2	2	2	5.1	140.33	4145300000	1725000000	1466600000	2621900000	2155500000	2494500000
G0Z3A2	G0Z3A2	tr|G0Z3A2|G0Z3A2_CERNI Catalase OS=Cervus nippon OX=9863 GN=CAT PE=2 SV=1	1	17	17	17	45.9	60.027	373820000	222790000	242970000	489460000	518360000	617200000
J9UJQ1	J9UJQ1;Q2Q1M6;A0A212CTA4	tr|J9UJQ1|J9UJQ1_CERNH Annexin OS=Cervus nippon hortulorum OX=92866 PE=2 SV=1;sp|Q2Q1M6|ANXA2_CEREL Annexin A2 OS=Cervus elaphus OX=9860 GN=ANXA2 PE=2 SV=1;tr|A0A212CTA4|A0A212CTA4_CEREH Annexin OS=Cervus elaphus hippelaphus OX=46360 GN=Celaphus_00006243 P	3	24	24	24	68.4	38.612	1217100000	2074800000	2341100000	1865000000	1501500000	1675600000
O46412	O46412;V5LTF3	sp|O46412|SODC_CEREL Superoxide dismutase [Cu-Zn] OS=Cervus elaphus OX=9860 GN=SOD1 PE=2 SV=3;tr|V5LTF3|V5LTF3_CERNI Cu/Zn superoxide dismutase (Fragment) OS=Cervus nippon OX=9863 PE=2 SV=1	2	6	6	6	48	15.829	549610000	1191500000	1146900000	993900000	1390100000	1050100000
P14447	P14447	sp|P14447|FIBA_CERNI Fibrinogen alpha chain (Fragment) OS=Cervus nippon OX=9863 GN=FGA PE=1 SV=1	1	1	1	1	100	1.8219		7751100
Q1PHW0	Q1PHW0	tr|Q1PHW0|Q1PHW0_CEREL Phosphatidylethanolamine-binding protein OS=Cervus elaphus OX=9860 PE=2 SV=1	1	7	4	7	58.5	18.892	403770000	442360000	333350000	381690000	385330000	386410000
Q2Q1M7	Q2Q1M7	tr|Q2Q1M7|Q2Q1M7_CEREL Tropomyosin 1 alpha OS=Cervus elaphus OX=9860 GN=TMP1 PE=2 SV=1	1	15	3	15	50	32.863	1285800000	1212900000	1091900000	648030000	786660000	671230000
Q2TQK8	Q2TQK8;Q2TQJ9;Q2TQN1;Q2TQL1;Q2TQJ1;Q2TQL8;Q2TQK0;Q2TQN9;Q2TQN7;Q2TQN3;Q2TQM9;Q2TQL5;Q2TQK4;Q2TQJ6;Q2TQJ5;Q2TQJ4;Q2TQJ3;Q2TQJ0;Q2TQI8;Q2TQI6;Q2TQI2;Q2TQI1;Q2TQI0;Q2TQH9;Q2TQH6;Q2TQH1;Q2TQH0;Q2TQG9;Q2TQG6;Q2TQG2;Q2TQG1;Q2TQF6;Q2TQD4;Q2TQB7;Q2TQN8;Q2TQN0;Q2TQM1;Q2TQL9;Q2TQK7;Q2TQK2;Q2TQJ8;Q2TQJ7;Q2TQP4;Q2TQP0	tr|Q2TQK8|Q2TQK8_CERNI MHC class I antigen (Fragment) OS=Cervus nippon OX=9863 GN=Ceni-A PE=4 SV=1;tr|Q2TQJ9|Q2TQJ9_CERNI MHC class I antigen (Fragment) OS=Cervus nippon OX=9863 GN=Ceni-A PE=4 SV=1;tr|Q2TQN1|Q2TQN1_CERNI MHC class I antigen (Fragment) OS=C	44	3	2	3	37.3	8.6905	42913000	52638000	23978000		33117000	31396000
Q2TQN6	Q2TQN6;Q2TQM8;Q2TQK3	tr|Q2TQN6|Q2TQN6_CERNI MHC class I antigen (Fragment) OS=Cervus nippon OX=9863 GN=Ceni-A PE=4 SV=1;tr|Q2TQM8|Q2TQM8_CERNI MHC class I antigen (Fragment) OS=Cervus nippon OX=9863 GN=Ceni-A PE=4 SV=1;tr|Q2TQK3|Q2TQK3_CERNI MHC class I antigen (Fragment) OS=C	3	2	1	1	33.3	8.8266
Q2TQQ2	Q2TQQ2;Q2TQP8	tr|Q2TQQ2|Q2TQQ2_CERNI MHC class I antigen (Fragment) OS=Cervus nippon OX=9863 GN=Ceni-C PE=3 SV=1;tr|Q2TQP8|Q2TQP8_CERNI MHC class I antigen (Fragment) OS=Cervus nippon OX=9863 GN=Ceni-C PE=3 SV=1	2	1	1	1	17.3	8.5074		40665000	25184000	29892000	28494000	30299000
Q2TQT9	Q2TQT9;Q2TQT7	tr|Q2TQT9|Q2TQT9_CERNI MHC class I antigen (Fragment) OS=Cervus nippon OX=9863 GN=Ceni-A PE=3 SV=1;tr|Q2TQT7|Q2TQT7_CERNI MHC class I antigen (Fragment) OS=Cervus nippon OX=9863 GN=Ceni-B PE=3 SV=1	2	1	1	1	13.3	8.4262		12100000	18304000			14057000
Q30352	Q30352	tr|Q30352|Q30352_CEREL MHC class I allele Ceel*03 (Fragment) OS=Cervus elaphus OX=9860 PE=2 SV=1	1	3	3	3	64.3	9.2812				75604000	46160000	73822000
Q6DQI7	Q6DQI7;A0A212D3C7;A0A212DDA6	tr|Q6DQI7|Q6DQI7_CEREL Glyceraldehyde-3-phosphate dehydrogenase (Fragment) OS=Cervus elaphus OX=9860 PE=2 SV=1	3	9	3	9	68.9	20.576	1465900000	932160000	1203700000	1237400000	1369400000	1566500000
Q8SQ39	Q8SQ39	tr|Q8SQ39|Q8SQ39_CERNI Bucentaur (Fragment) OS=Cervus nippon OX=9863 GN=bcnt PE=4 SV=1	1	1	1	1	3.8	42.12		5434800	9673300
Q9N0M4	Q9N0M4	tr|Q9N0M4|Q9N0M4_CERNI Complement C3 alpha chain (Fragment) OS=Cervus nippon OX=9863 PE=2 SV=1	1	8	3	3	52.1	18.671	172680000	187870000	212410000	211560000	207050000	79007000
X2GM95	X2GM95	tr|X2GM95|X2GM95_CERNI Serum albumin (Fragment) OS=Cervus nippon OX=9863 PE=2 SV=1	1	55	2	5	80.8	66.149	5970900000	8069100000	10812000000	8185900000	6091200000	8881200000
