# Supplementary material for: Comparative proteomics analysis reveals the difference during antler regeneration stage between red deer and sika deer
Source: PeerJ. 2019 Jul 17;7:e7299. doi: 10.7717/peerj.7299 (PMC6642628; doi:10.7717/peerj.7299)
Supplement: Table S4 [file peerj-07-7299-s004.xlsx]

## Sheet: Sheet1
Table S4. KEGG annotation for differentially expressed proteins between sika deer and red deer antler
Map_ID	Map_Name	Seqs	Seqs_Num	URL
ko05016	Huntington's disease	A0A172ZQ52 A0A212D9R7 A0A212CP34 A0A212C2R1 A0A212C0K1 A0A212C5J9 A0A212CA05 A0A212CE28 A0A212D1P4 A0A212D8C1 A0A212D8Y9 A0A212DI17	12	http://www.kegg.jp/kegg-bin/show_pathway?ko05016+K02125+K04646+K15040+K05863+K05863+K04644+K00414+K02268+K04645+K02266+K00419+K03936
ko04151	PI3K-Akt signaling pathway	A0A212C5S3 A0A212D1I8 A0A212CMX1 A0A212C632 A0A212C6B1 A0A212CF73 A0A212CFD7 A0A212D070 A0A212DF15 E7D7Z2	10	http://www.kegg.jp/kegg-bin/show_pathway?ko04151+K06241+K06856+K04354+K06240+K08131+K04347+K08131+K04659+K04079+K06250
ko05012	Parkinson's disease	A0A172ZQ52 A0A212CP34 A0A212C2R1 A0A212C0K1 A0A212CA05 A0A212CE28 A0A212D8C1 A0A212D8Y9 A0A212DI17	9	http://www.kegg.jp/kegg-bin/show_pathway?ko05012+K02125+K15040+K05863+K05863+K00414+K02268+K02266+K00419+K03936
ko05165	Human papillomavirus infection	A0A212C5S3 A0A212CMX1 A0A212C032 A0A212C632 A0A212C6B1 A0A212CFD7 A0A212D070 E7D7Z2	8	http://www.kegg.jp/kegg-bin/show_pathway?ko05165+K06241+K04354+K14009+K06240+K08131+K08131+K04659+K06250
ko04714	Thermogenesis	A0A172ZQ52 A0A212C9I4 A0A212CA05 A0A212CE28 A0A212D8C1 A0A212D8Y9 A0A212DI17	7	http://www.kegg.jp/kegg-bin/show_pathway?ko04714+K02125+K01054+K00414+K02268+K02266+K00419+K03936
ko00190	Oxidative phosphorylation	A0A172ZQ52 A0A212CA05 A0A212CD21 A0A212CE28 A0A212D8C1 A0A212D8Y9 A0A212DI17	7	http://www.kegg.jp/kegg-bin/show_pathway?ko00190+K02125+K00414+K02150+K02268+K02266+K00419+K03936
ko04512	ECM-receptor interaction	A0A212C5S3 A0A212C632 A0A212C6B1 A0A212CFD7 A0A212D070 E7D7Z2	6	http://www.kegg.jp/kegg-bin/show_pathway?ko04512+K06241+K06240+K08131+K08131+K04659+K06250
ko05010	Alzheimer's disease	A0A172ZQ52 A0A212CA05 A0A212CE28 A0A212D8C1 A0A212D8Y9 A0A212DI17	6	http://www.kegg.jp/kegg-bin/show_pathway?ko05010+K02125+K00414+K02268+K02266+K00419+K03936
ko05200	Pathways in cancer	A0A212CHT9 A0A212C5S3 A0A212C632 A0A212CCE9 A0A212CF73 A0A212DF15	6	http://www.kegg.jp/kegg-bin/show_pathway?ko05200+K00799+K06241+K06240+K00799+K04347+K04079
ko04510	Focal adhesion	A0A212C5S3 A0A212C632 A0A212C6B1 A0A212CFD7 A0A212D070 E7D7Z2	6	http://www.kegg.jp/kegg-bin/show_pathway?ko04510+K06241+K06240+K08131+K08131+K04659+K06250
ko03010	Ribosome	A0A212CGQ3 A0A212CIR2 A0A212CD44 A0A212CH34 A0A212CL29 A0A212CVE3	6	http://www.kegg.jp/kegg-bin/show_pathway?ko03010+K02875+K02917+K02925+K02932+K02932+K02930
ko04217	Necroptosis	A0A212CP34 A0A212C2R1 A0A212C0K1 A0A212D0R4 A0A212DF15	5	http://www.kegg.jp/kegg-bin/show_pathway?ko04217+K15040+K05863+K05863+K11251+K04079
ko04141	Protein processing in endoplasmic reticulum	A0A212C032 A0A212CBC1 A0A212CF60 A0A212CV82 A0A212DF15	5	http://www.kegg.jp/kegg-bin/show_pathway?ko04141+K14009+K14012+K04523+K12668+K04079
ko04932	Non-alcoholic fatty liver disease (NAFLD)	A0A212CA05 A0A212CE28 A0A212D8C1 A0A212D8Y9 A0A212DI17	5	http://www.kegg.jp/kegg-bin/show_pathway?ko04932+K00414+K02268+K02266+K00419+K03936
ko05143	African trypanosomiasis	A0A220IGA3 A0A212C5S3 A0A220IGB1 A0A212CZ96 A0A212D1I8	5	http://www.kegg.jp/kegg-bin/show_pathway?ko05143+K13823+K06241+K13823+K13822+K06856
ko05144	Malaria	A0A220IGA3 A0A220IGB1 A0A212CZ96 A0A212D070	4	http://www.kegg.jp/kegg-bin/show_pathway?ko05144+K13823+K13823+K13822+K04659
ko04020	Calcium signaling pathway	A0A212CP34 A0A212C2R1 A0A212D1I8 A0A212C0K1	4	http://www.kegg.jp/kegg-bin/show_pathway?ko04020+K15040+K05863+K06856+K05863
ko04721	Synaptic vesicle cycle	A0A212D9R7 A0A212C5J9 A0A212CD21 A0A212D1P4	4	http://www.kegg.jp/kegg-bin/show_pathway?ko04721+K04646+K04644+K02150+K04645
ko04610	Complement and coagulation cascades	A0A212CDI8 A0A212DIJ0 A0A212D3M2 A0A212CQV1	4	http://www.kegg.jp/kegg-bin/show_pathway?ko04610+K03910+K04008+K03986+K04002
ko04260	Cardiac muscle contraction	A0A212CA05 A0A212CE28 A0A212D8C1 A0A212D8Y9	4	http://www.kegg.jp/kegg-bin/show_pathway?ko04260+K00414+K02268+K02266+K00419
ko04974	Protein digestion and absorption	A0A212C6B1 A0A212CFD7 A0A212CNY4 A0A212DDT9	4	http://www.kegg.jp/kegg-bin/show_pathway?ko04974+K08131+K08131+K07603+K05616
ko04145	Phagosome	A0A212D3A3 A0A212D1I8 A0A212CD21 A0A212D070	4	http://www.kegg.jp/kegg-bin/show_pathway?ko04145+K07374+K06856+K02150+K04659
ko05100	Bacterial invasion of epithelial cells	A0A212D9R7 A0A212C5J9 A0A212D1P4	3	http://www.kegg.jp/kegg-bin/show_pathway?ko05100+K04646+K04644+K04645
ko04024	cAMP signaling pathway	A0A212C4D8 A0A212C4E1 A0A212C4P6	3	http://www.kegg.jp/kegg-bin/show_pathway?ko04024+K05673+K05673+K05673
ko05146	Amoebiasis	A0A212C5S3 A0A212D1I8 A0A212C632	3	http://www.kegg.jp/kegg-bin/show_pathway?ko05146+K06241+K06856+K06240
ko04530	Tight junction	A0A212D3A3 A0A212CD52 A0A212CMX1	3	http://www.kegg.jp/kegg-bin/show_pathway?ko04530+K07374+K10352+K04354
ko04022	cGMP - PKG signaling pathway	A0A212CP34 A0A212C2R1 A0A212C0K1	3	http://www.kegg.jp/kegg-bin/show_pathway?ko04022+K15040+K05863+K05863
ko02010	ABC transporters	A0A212C4D8 A0A212C4E1 A0A212C4P6	3	http://www.kegg.jp/kegg-bin/show_pathway?ko02010+K05673+K05673+K05673
ko01523	Antifolate resistance	A0A212C4D8 A0A212C4E1 A0A212C4P6	3	http://www.kegg.jp/kegg-bin/show_pathway?ko01523+K05673+K05673+K05673
ko04218	Cellular senescence	A0A212CP34 A0A212C2R1 A0A212C0K1	3	http://www.kegg.jp/kegg-bin/show_pathway?ko04218+K15040+K05863+K05863
ko03050	Proteasome	A0A212CAT6 A0A212CVR6 A0A212D9M9	3	http://www.kegg.jp/kegg-bin/show_pathway?ko03050+K06700+K02737+K03036
ko04961	Endocrine and other factor-regulated calcium reabsorption	A0A212D9R7 A0A212C5J9 A0A212D1P4	3	http://www.kegg.jp/kegg-bin/show_pathway?ko04961+K04646+K04644+K04645
ko00480	Glutathione metabolism	A0A212CHT9 A0A212C8P0 A0A212CCE9	3	http://www.kegg.jp/kegg-bin/show_pathway?ko00480+K00799+K00432+K00799
ko04723	Retrograde endocannabinoid signaling	A0A212C9I4 A0A212CF73 A0A212DI17	3	http://www.kegg.jp/kegg-bin/show_pathway?ko04723+K01054+K04347+K03936
ko05230	Central carbon metabolism in cancer	A0A212C9H1 A0A212CP82 A0A212DDT9	3	http://www.kegg.jp/kegg-bin/show_pathway?ko05230+K00162+K00844+K05616
ko05166	HTLV-I infection	A0A212CP34 A0A212C2R1 A0A212C0K1	3	http://www.kegg.jp/kegg-bin/show_pathway?ko05166+K15040+K05863+K05863
ko05418	Fluid shear stress and atherosclerosis	A0A212CHT9 A0A212CCE9 A0A212DF15	3	http://www.kegg.jp/kegg-bin/show_pathway?ko05418+K00799+K00799+K04079
ko05322	Systemic lupus erythematosus	A0A212D1I8 A0A212D3M2 A0A212D0R4	3	http://www.kegg.jp/kegg-bin/show_pathway?ko05322+K06856+K03986+K11251
ko04976	Bile secretion	A0A212C4D8 A0A212C4E1 A0A212C4P6	3	http://www.kegg.jp/kegg-bin/show_pathway?ko04976+K05673+K05673+K05673
ko04142	Lysosome	A0A212D9R7 A0A212C5J9 A0A212D1P4	3	http://www.kegg.jp/kegg-bin/show_pathway?ko04142+K04646+K04644+K04645
ko04144	Endocytosis	A0A212D9R7 A0A212C5J9 A0A212D1P4	3	http://www.kegg.jp/kegg-bin/show_pathway?ko04144+K04646+K04644+K04645
ko00983	Drug metabolism - other enzymes	A0A212CHT9 A0A212CCE9	2	http://www.kegg.jp/kegg-bin/show_pathway?ko00983+K00799+K00799
ko05150	Staphylococcus aureus infection	A0A212D1I8 A0A212D3M2	2	http://www.kegg.jp/kegg-bin/show_pathway?ko05150+K06856+K03986
ko04728	Dopaminergic synapse	A0A212CMX1 A0A212CF73	2	http://www.kegg.jp/kegg-bin/show_pathway?ko04728+K04354+K04347
ko04216	Ferroptosis	A0A212CP34 A0A212DFD0	2	http://www.kegg.jp/kegg-bin/show_pathway?ko04216+K15040+K13162
ko04975	Fat digestion and absorption	A0A212CVI7 A0A212DHT3	2	http://www.kegg.jp/kegg-bin/show_pathway?ko04975+K14462+K14457
ko00980	Metabolism of xenobiotics by cytochrome P450	A0A212CHT9 A0A212CCE9	2	http://www.kegg.jp/kegg-bin/show_pathway?ko00980+K00799+K00799
ko00230	Purine metabolism	A0A212CXR2 A0A212D3D4	2	http://www.kegg.jp/kegg-bin/show_pathway?ko00230+K00939+K00939
ko05323	Rheumatoid arthritis	A0A212D1I8 A0A212CD21	2	http://www.kegg.jp/kegg-bin/show_pathway?ko05323+K06856+K02150
ko04979	Cholesterol metabolism	A0A212CP34 A0A212CVI7	2	http://www.kegg.jp/kegg-bin/show_pathway?ko04979+K15040+K14462
ko00561	Glycerolipid metabolism	A0A212C9I4 A0A212DHT3	2	http://www.kegg.jp/kegg-bin/show_pathway?ko00561+K01054+K14457
ko00052	Galactose metabolism	A0A212CP82 A0A212CX07	2	http://www.kegg.jp/kegg-bin/show_pathway?ko00052+K00844+K00963
ko00520	Amino sugar and nucleotide sugar metabolism	A0A212CP82 A0A212CX07	2	http://www.kegg.jp/kegg-bin/show_pathway?ko00520+K00844+K00963
ko04915	Estrogen signaling pathway	A0A212DA24 A0A212DF15	2	http://www.kegg.jp/kegg-bin/show_pathway?ko04915+K07604+K04079
ko04640	Hematopoietic cell lineage	A0A212D1I8 A0A212DIJ0	2	http://www.kegg.jp/kegg-bin/show_pathway?ko04640+K06856+K04008
ko03040	Spliceosome	A0A212C2D7 A0A212CA59	2	http://www.kegg.jp/kegg-bin/show_pathway?ko03040+K12741+K12622
ko00500	Starch and sucrose metabolism	A0A212CP82 A0A212CX07	2	http://www.kegg.jp/kegg-bin/show_pathway?ko00500+K00844+K00963
ko04918	Thyroid hormone synthesis	A0A212C6Y8 A0A212C8P0	2	http://www.kegg.jp/kegg-bin/show_pathway?ko04918+K20731+K00432
ko05225	Hepatocellular carcinoma	A0A212CHT9 A0A212CCE9	2	http://www.kegg.jp/kegg-bin/show_pathway?ko05225+K00799+K00799
ko04066	HIF-1 signaling pathway	A0A212C9H1 A0A212CP82	2	http://www.kegg.jp/kegg-bin/show_pathway?ko04066+K00162+K00844
ko04371	Apelin signaling pathway	A0A212CF73 E7D7Z2	2	http://www.kegg.jp/kegg-bin/show_pathway?ko04371+K04347+K06250
ko00020	Citrate cycle (TCA cycle)	A0A212C9H1 A0A212D7P1	2	http://www.kegg.jp/kegg-bin/show_pathway?ko00020+K00162+K01648
ko05145	Toxoplasmosis	A0A212C5S3 A0A212C632	2	http://www.kegg.jp/kegg-bin/show_pathway?ko05145+K06241+K06240
ko05133	Pertussis	A0A212D3M2 A0A212CQV1	2	http://www.kegg.jp/kegg-bin/show_pathway?ko05133+K03986+K04002
ko05204	Chemical carcinogenesis	A0A212CHT9 A0A212CCE9	2	http://www.kegg.jp/kegg-bin/show_pathway?ko05204+K00799+K00799
ko04657	IL-17 signaling pathway	A0A212CWY8 A0A212DF15	2	http://www.kegg.jp/kegg-bin/show_pathway?ko04657+K21129+K04079
ko00730	Thiamine metabolism	A0A212CXR2 A0A212D3D4	2	http://www.kegg.jp/kegg-bin/show_pathway?ko00730+K00939+K00939
ko05142	Chagas disease (American trypanosomiasis)	A0A212CMX1 A0A212D3M2	2	http://www.kegg.jp/kegg-bin/show_pathway?ko05142+K04354+K03986
ko05222	Small cell lung cancer	A0A212C5S3 A0A212C632	2	http://www.kegg.jp/kegg-bin/show_pathway?ko05222+K06241+K06240
ko05034	Alcoholism	A0A212CF73 A0A212D0R4	2	http://www.kegg.jp/kegg-bin/show_pathway?ko05034+K04347+K11251
ko00982	Drug metabolism - cytochrome P450	A0A212CHT9 A0A212CCE9	2	http://www.kegg.jp/kegg-bin/show_pathway?ko00982+K00799+K00799
ko04621	NOD-like receptor signaling pathway	A0A212CP34 A0A212DF15	2	http://www.kegg.jp/kegg-bin/show_pathway?ko04621+K15040+K04079
ko01524	Platinum drug resistance	A0A212CHT9 A0A212CCE9	2	http://www.kegg.jp/kegg-bin/show_pathway?ko01524+K00799+K00799
ko00010	Glycolysis / Gluconeogenesis	A0A212C9H1 A0A212CP82	2	http://www.kegg.jp/kegg-bin/show_pathway?ko00010+K00162+K00844
ko04966	Collecting duct acid secretion	A0A212D9C4 A0A212CD21	2	http://www.kegg.jp/kegg-bin/show_pathway?ko04966+K06573+K02150
ko05020	Prion diseases	A0A212D3M2 A0A212DHC6	2	http://www.kegg.jp/kegg-bin/show_pathway?ko05020+K03986+K09553
ko05169	Epstein-Barr virus infection	A0A212D1I8 A0A212D9M9	2	http://www.kegg.jp/kegg-bin/show_pathway?ko05169+K06856+K03036
ko03320	PPAR signaling pathway	A0A212CEE6 A0A212D2Z5	2	http://www.kegg.jp/kegg-bin/show_pathway?ko03320+K08754+K08752
ko00970	Aminoacyl-tRNA biosynthesis	A0A212DD90	1	http://www.kegg.jp/kegg-bin/show_pathway?ko00970+K01872
ko04064	NF-kappa B signaling pathway	A0A212D1I8	1	http://www.kegg.jp/kegg-bin/show_pathway?ko04064+K06856
ko04620	Toll-like receptor signaling pathway	E7D7Z2	1	http://www.kegg.jp/kegg-bin/show_pathway?ko04620+K06250
ko05215	Prostate cancer	A0A212DF15	1	http://www.kegg.jp/kegg-bin/show_pathway?ko05215+K04079
ko04810	Regulation of actin cytoskeleton	A0A212CF73	1	http://www.kegg.jp/kegg-bin/show_pathway?ko04810+K04347
ko04666	Fc gamma R-mediated phagocytosis	A0A212D1I8	1	http://www.kegg.jp/kegg-bin/show_pathway?ko04666+K06856
ko04010	MAPK signaling pathway	A0A212CF73	1	http://www.kegg.jp/kegg-bin/show_pathway?ko04010+K04347
ko04622	RIG-I-like receptor signaling pathway	A0A212C923	1	http://www.kegg.jp/kegg-bin/show_pathway?ko04622+K12651
ko03013	RNA transport	A0A212DI04	1	http://www.kegg.jp/kegg-bin/show_pathway?ko03013+K03249
ko00910	Nitrogen metabolism	A0A212CE91	1	http://www.kegg.jp/kegg-bin/show_pathway?ko00910+K01672
ko00071	Fatty acid degradation	A0A212C756	1	http://www.kegg.jp/kegg-bin/show_pathway?ko00071+K07508
ko05032	Morphine addiction	A0A212CF73	1	http://www.kegg.jp/kegg-bin/show_pathway?ko05032+K04347
ko05160	Hepatitis C	A0A212CMX1	1	http://www.kegg.jp/kegg-bin/show_pathway?ko05160+K04354
ko05202	Transcriptional misregulation in cancers	A0A212D1I8	1	http://www.kegg.jp/kegg-bin/show_pathway?ko05202+K06856
ko00062	Fatty acid elongation	A0A212C756	1	http://www.kegg.jp/kegg-bin/show_pathway?ko00062+K07508
ko05110	Vibrio cholerae infection	A0A212CD21	1	http://www.kegg.jp/kegg-bin/show_pathway?ko05110+K02150
ko00510	N-Glycan biosynthesis	A0A212CV82	1	http://www.kegg.jp/kegg-bin/show_pathway?ko00510+K12668
ko05161	Hepatitis B	A0A212DGJ0	1	http://www.kegg.jp/kegg-bin/show_pathway?ko05161+K10610
ko00830	Retinol metabolism	A0A212CEK9	1	http://www.kegg.jp/kegg-bin/show_pathway?ko00830+K15734
ko04072	Phospholipase D signaling pathway	A0A212D1I8	1	http://www.kegg.jp/kegg-bin/show_pathway?ko04072+K06856
ko05203	Viral carcinogenesis	A0A212DGJ0	1	http://www.kegg.jp/kegg-bin/show_pathway?ko05203+K10610
ko04726	Serotonergic synapse	A0A212CF73	1	http://www.kegg.jp/kegg-bin/show_pathway?ko04726+K04347
ko04120	Ubiquitin mediated proteolysis	A0A212DGJ0	1	http://www.kegg.jp/kegg-bin/show_pathway?ko04120+K10610
ko04659	Th17 cell differentiation	A0A212DF15	1	http://www.kegg.jp/kegg-bin/show_pathway?ko04659+K04079
ko04014	Ras signaling pathway	A0A212CF73	1	http://www.kegg.jp/kegg-bin/show_pathway?ko04014+K04347
ko05205	Proteoglycans in cancer	A0A212C320	1	http://www.kegg.jp/kegg-bin/show_pathway?ko05205+K10380
ko05310	Asthma	A0A212D1I8	1	http://www.kegg.jp/kegg-bin/show_pathway?ko05310+K06856
ko00640	Propanoate metabolism	A0A212C5P6	1	http://www.kegg.jp/kegg-bin/show_pathway?ko00640+K18426
ko00524	Neomycin, kanamycin and gentamicin biosynthesis	A0A212CP82	1	http://www.kegg.jp/kegg-bin/show_pathway?ko00524+K00844
ko05130	Pathogenic Escherichia coli infection	A0A212D3A3	1	http://www.kegg.jp/kegg-bin/show_pathway?ko05130+K07374
ko05162	Measles	A0A212D1I8	1	http://www.kegg.jp/kegg-bin/show_pathway?ko05162+K06856
ko00590	Arachidonic acid metabolism	A0A212C8P0	1	http://www.kegg.jp/kegg-bin/show_pathway?ko00590+K00432
ko05414	Dilated cardiomyopathy (DCM)	A0A212D1I8	1	http://www.kegg.jp/kegg-bin/show_pathway?ko05414+K06856
ko04923	Regulation of lipolysis in adipocyte	A0A212C9I4	1	http://www.kegg.jp/kegg-bin/show_pathway?ko04923+K01054
ko04111	Cell cycle - yeast	A0A212CMX1	1	http://www.kegg.jp/kegg-bin/show_pathway?ko04111+K04354
ko04210	Apoptosis	A0A212D3A3	1	http://www.kegg.jp/kegg-bin/show_pathway?ko04210+K07374
ko04514	Cell adhesion molecules (CAMs)	A0A212D0Y3	1	http://www.kegg.jp/kegg-bin/show_pathway?ko04514+K06793
ko04727	GABAergic synapse	A0A212CF73	1	http://www.kegg.jp/kegg-bin/show_pathway?ko04727+K04347
ko04977	Vitamin digestion and absorption	A0A212CVI7	1	http://www.kegg.jp/kegg-bin/show_pathway?ko04977+K14462
ko04662	B cell receptor signaling pathway	A0A212D1I8	1	http://www.kegg.jp/kegg-bin/show_pathway?ko04662+K06856
ko04926	Relaxin signaling pathway	A0A212CF73	1	http://www.kegg.jp/kegg-bin/show_pathway?ko04926+K04347
ko05167	Kaposi's sarcoma-associated herpesvirus infection	A0A212CF73	1	http://www.kegg.jp/kegg-bin/show_pathway?ko05167+K04347
ko04310	Wnt signaling pathway	A0A212D8U5	1	http://www.kegg.jp/kegg-bin/show_pathway?ko04310+K19614
ko04713	Circadian entrainment	A0A212CF73	1	http://www.kegg.jp/kegg-bin/show_pathway?ko04713+K04347
ko04071	Sphingolipid signaling pathway	A0A212CMX1	1	http://www.kegg.jp/kegg-bin/show_pathway?ko04071+K04354
ko04922	Glucagon signaling pathway	A0A212C9H1	1	http://www.kegg.jp/kegg-bin/show_pathway?ko04922+K00162
ko04261	Adrenergic signaling in cardiomyocytes	A0A212CMX1	1	http://www.kegg.jp/kegg-bin/show_pathway?ko04261+K04354
ko04626	Plant-pathogen interaction	A0A212DF15	1	http://www.kegg.jp/kegg-bin/show_pathway?ko04626+K04079
ko04725	Cholinergic synapse	A0A212CF73	1	http://www.kegg.jp/kegg-bin/show_pathway?ko04725+K04347
ko04664	Fc epsilon RI signaling pathway	A0A212D1I8	1	http://www.kegg.jp/kegg-bin/show_pathway?ko04664+K06856
ko00051	Fructose and mannose metabolism	A0A212CP82	1	http://www.kegg.jp/kegg-bin/show_pathway?ko00051+K00844
ko05320	Autoimmune thyroid disease	A0A212D1I8	1	http://www.kegg.jp/kegg-bin/show_pathway?ko05320+K06856
ko04930	Type II diabetes mellitus	A0A212CP82	1	http://www.kegg.jp/kegg-bin/show_pathway?ko04930+K00844
ko05412	Arrhythmogenic right ventricular cardiomyopathy (ARVC)	A0A212CNV8	1	http://www.kegg.jp/kegg-bin/show_pathway?ko05412+K21073
ko00040	Pentose and glucuronate interconversions	A0A212CX07	1	http://www.kegg.jp/kegg-bin/show_pathway?ko00040+K00963
ko03015	mRNA surveillance pathway	A0A212CMX1	1	http://www.kegg.jp/kegg-bin/show_pathway?ko03015+K04354
ko03018	RNA degradation	A0A212CA59	1	http://www.kegg.jp/kegg-bin/show_pathway?ko03018+K12622
ko04540	Gap junction	A0A212D3A3	1	http://www.kegg.jp/kegg-bin/show_pathway?ko04540+K07374
ko04672	Intestinal immune network for IgA production	A0A212D1I8	1	http://www.kegg.jp/kegg-bin/show_pathway?ko04672+K06856
ko00760	Nicotinate and nicotinamide metabolism	A0A212C8F9	1	http://www.kegg.jp/kegg-bin/show_pathway?ko00760+K00323
ko04390	Hippo signaling pathway	A0A212CMX1	1	http://www.kegg.jp/kegg-bin/show_pathway?ko04390+K04354
ko05152	Tuberculosis	A0A212D1I8	1	http://www.kegg.jp/kegg-bin/show_pathway?ko05152+K06856
ko05340	Primary immunodeficiency	A0A212D1I8	1	http://www.kegg.jp/kegg-bin/show_pathway?ko05340+K06856
ko04650	Natural killer cell mediated cytotoxicity	A0A212D1I8	1	http://www.kegg.jp/kegg-bin/show_pathway?ko04650+K06856
ko00280	Valine, leucine and isoleucine degradation	A0A212C756	1	http://www.kegg.jp/kegg-bin/show_pathway?ko00280+K07508
ko04150	mTOR signaling pathway	A0A212CD21	1	http://www.kegg.jp/kegg-bin/show_pathway?ko04150+K02150
ko00790	Folate biosynthesis	A0A212CXI6	1	http://www.kegg.jp/kegg-bin/show_pathway?ko00790+K00072
ko05140	Leishmaniasis	A0A212D1I8	1	http://www.kegg.jp/kegg-bin/show_pathway?ko05140+K06856
ko00513	Various types of N-glycan biosynthesis	A0A212CV82	1	http://www.kegg.jp/kegg-bin/show_pathway?ko00513+K12668
ko04152	AMPK signaling pathway	A0A212CMX1	1	http://www.kegg.jp/kegg-bin/show_pathway?ko04152+K04354
ko04624	Toll and Imd signaling pathway	A0A212C320	1	http://www.kegg.jp/kegg-bin/show_pathway?ko04624+K10380
ko04612	Antigen processing and presentation	A0A212DF15	1	http://www.kegg.jp/kegg-bin/show_pathway?ko04612+K04079
ko05416	Viral myocarditis	A0A212D1I8	1	http://www.kegg.jp/kegg-bin/show_pathway?ko05416+K06856
ko04910	Insulin signaling pathway	A0A212CP82	1	http://www.kegg.jp/kegg-bin/show_pathway?ko04910+K00844
ko04391	Hippo signaling pathway -fly	A0A212CMX1	1	http://www.kegg.jp/kegg-bin/show_pathway?ko04391+K04354
ko00620	Pyruvate metabolism	A0A212C9H1	1	http://www.kegg.jp/kegg-bin/show_pathway?ko00620+K00162
ko05330	Allograft rejection	A0A212D1I8	1	http://www.kegg.jp/kegg-bin/show_pathway?ko05330+K06856
ko04724	Glutamatergic synapse	A0A212CF73	1	http://www.kegg.jp/kegg-bin/show_pathway?ko04724+K04347
ko04973	Carbohydrate digestion and absorption	A0A212CP82	1	http://www.kegg.jp/kegg-bin/show_pathway?ko04973+K00844
ko04914	Progesterone-mediated oocyte maturation	A0A212DF15	1	http://www.kegg.jp/kegg-bin/show_pathway?ko04914+K04079
ko00720	Carbon fixation pathways in prokaryotes	A0A212D7P1	1	http://www.kegg.jp/kegg-bin/show_pathway?ko00720+K01648
ko05120	Epithelial cell signaling in Helicobacter pylori infection	A0A212CD21	1	http://www.kegg.jp/kegg-bin/show_pathway?ko05120+K02150
ko03420	Nucleotide excision repair	A0A212DGJ0	1	http://www.kegg.jp/kegg-bin/show_pathway?ko03420+K10610
ko00521	Streptomycin biosynthesis	A0A212CP82	1	http://www.kegg.jp/kegg-bin/show_pathway?ko00521+K00844
ko04062	Chemokine signaling pathway	A0A212CF73	1	http://www.kegg.jp/kegg-bin/show_pathway?ko04062+K04347
